# Supplementary material for: Remote selective decarboxylative difluoroarylmethylation of 8-aminoquinolines under transition metal-free conditions
Source: Royal Society of Chemistry journal article supplement (doi:10.1039/d1qo01912k), 2022-01-01

# Remote Selective Decarboxylative Difluoroarylmethylation of 8-Aminoquinolines under Transition Metal-Free Conditions

Xiaolong Guo,<sup>#</sup> Pingping Li,<sup>#</sup> Qing Wang, Qi Wang, and Luyao Wang\*

<sup>a</sup> Department of Chemistry, Capital Normal University, Beijing 100048, People's Republic of China

E-mail: xdwly@163.com

## Table of Contents

|                                                                                  |            |
|----------------------------------------------------------------------------------|------------|
| <b>1. General Information</b>                                                    | <b>S2</b>  |
| <b>2. General Procedures</b>                                                     | <b>S2</b>  |
| <b>3. Crystal data of 3a</b>                                                     | <b>S3</b>  |
| <b>4. <sup>1</sup>H, <sup>19</sup>F, <sup>13</sup>C NMR, and HRMS Data</b>       | <b>S4</b>  |
| <b>5. References</b>                                                             | <b>S18</b> |
| <b>6. Copies of <sup>1</sup>H, <sup>19</sup>F and <sup>13</sup>C NMR Spectra</b> | <b>S19</b> |

## 1. General Information

Unless otherwise noted, all reagents and solvents were used directly as obtained commercially without further purification. Column chromatography was performed using silica gel (200-300 mesh size) with indicated solvents. Thin-layer chromatography (TLC) was conducted with silica gel GF254 precoated plates (0.25 mm) and visualized with UV light. All  $^1\text{H}$  NMR spectra were recorded on 600 MHz spectrometers, and the data are reported in ppm using solvents as internal standards ( $\text{CDCl}_3$  at 7.26 ppm,  $\text{DMSO-}d_6$  at 2.50 ppm). All proton-decoupled  $^{13}\text{C}$  NMR spectra were recorded at 151 MHz, and the data are reported in ppm using solvents as internal standards ( $\text{CDCl}_3$  at 77.2 ppm,  $\text{DMSO-}d_6$  at 39.5 ppm). HRMS analyses of the compounds were conducted on a Thermo Q Exactive mass spectrometer using electrospray ionization in the positive ion mode. All the compounds were solid, and melting points were measured on a micromelting point apparatus.

## 2. General Procedures

### General Procedures for the Synthesis of 8-Aminoquinolines<sup>1</sup>

A 100 mL two-necked round-bottom flask was equipped with magnetic stirbar and charged with 8-Aminoquinoline (10 mmol), *N,N*-dimethyl-4-aminopyridine (DMAP, 0.1 equiv, 0.12 g) dissolved in 15 mL anhydrous  $\text{CH}_2\text{Cl}_2$  at 0 °C. Then acyl chloride (15.0 mmol) was added to the system dropwise under air. After the addition, the reaction was then warmed to room temperature, stirred for overnight and extracted three times using dilute hydrochloric acid (1.0 mol/L) and saturated sodium carbonate solution, the organic layer was dried over  $\text{Na}_2\text{SO}_4$ , and the target product was obtained by flash column chromatography on silica gel using petroleum ether and ethyl acetate.

### General procedure for the Synthesis $\alpha$ , $\alpha$ -difluoroarylacetic acids<sup>2</sup>

Activation of Cu powder:

Copper powder (< 424  $\mu\text{m}$ , 26 mmol) was stirred vigorously in diluted aq. HCl (1 M, 10 mL) for 10 min at room temperature and filtered. This procedure was repeated with water (10 mL), MeOH (10 mL) and acetone (10 mL), respectively. Finally, the copper powder was dried under vacuum for 15 min before use.

In a 50 mL round bottom flask under air the appropriate aryl iodide (10 mmol) and ethyl bromodifluoroacetate (1.3 mL, 10 mmol) were added to a suspension of Cu powder (1.7 g, 26 mmol) in DMSO (26 mL, 0.4 M). The reaction mixture was stirred at 60 °C for 12 h, after which time it was poured into water (50 mL), and extracted with EtOAc (2  $\times$  30 mL). Then, the combined organic layer was washed with water (3  $\times$  30 mL), dried over  $\text{Na}_2\text{SO}_4$  and concentrated in vacuum. The product was used for next step without further purification.

In a 50 mL round bottom flask, product obtained by last step was added to a mixture of MeOH (30 mL) and 1 M  $\text{K}_2\text{CO}_3$  aq. (30 mL) and stirred for 2 h at room temperature. The reaction was then poured into 3 M HCl aq. to acidify to pH 1, and the aqueous phase was extracted with EtOAc (2  $\times$  50 mL), washed with brine (2  $\times$  30 mL), dried over  $\text{Na}_2\text{SO}_4$  and concentrated in vacuo. The residue was purified by flash column chromatography with *n*-hexane/ EtOAc (5/1 to 3/1) to afford  $\alpha$ , $\alpha$ -difluoroaromatic acids.

### 3. Crystal data of 3a

X-ray structure of 3a, ellipsoid contour probability levels is 50%. (CCDC No. 2055729)

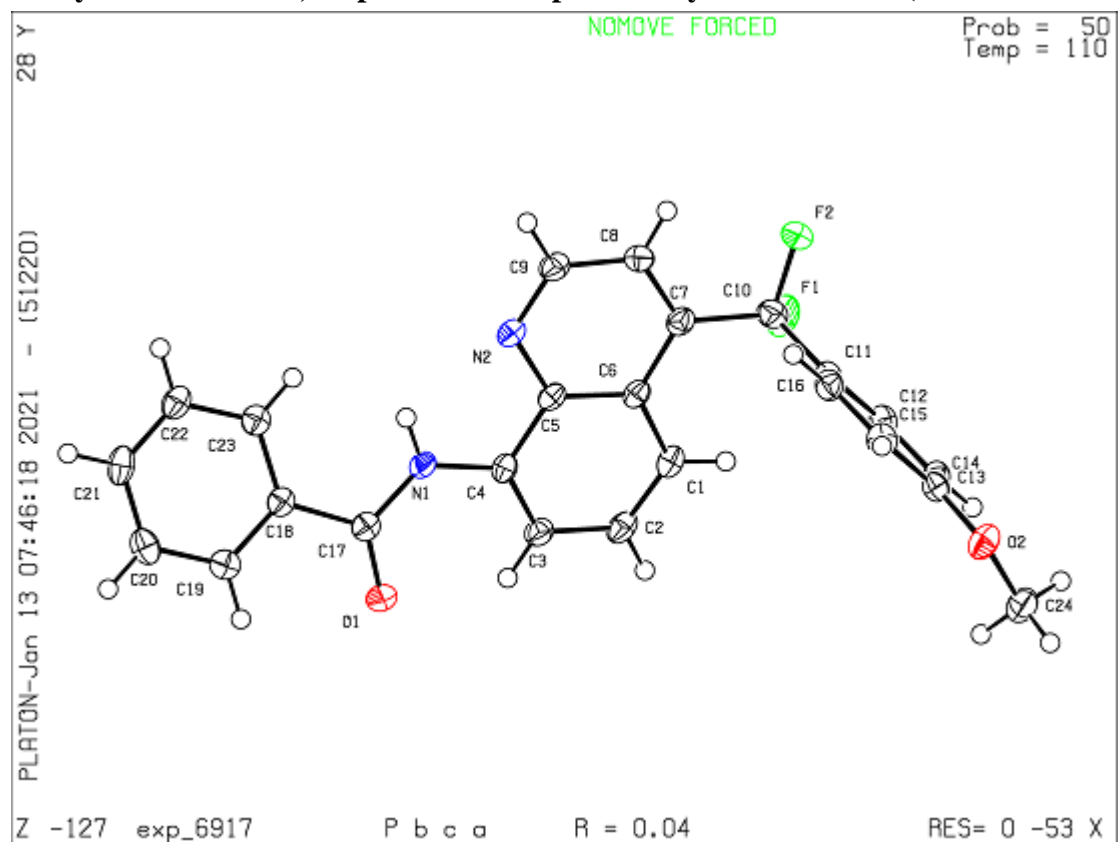

|                                         |                                                                              |
|-----------------------------------------|------------------------------------------------------------------------------|
| Compound                                | 3a                                                                           |
| Empirical formula                       | C <sub>24</sub> H <sub>18</sub> F <sub>2</sub> N <sub>2</sub> O <sub>2</sub> |
| Formula weight                          | 404.40                                                                       |
| Temperature/K                           | 109.90(10)                                                                   |
| Crystal system                          | orthorhombic                                                                 |
| Space group                             | Pbca                                                                         |
| a/Å                                     | 15.1154(4)                                                                   |
| b/Å                                     | 8.6495(3)                                                                    |
| c/Å                                     | 28.5881(9)                                                                   |
| α/°                                     | 90.00                                                                        |
| β/°                                     | 90.00                                                                        |
| γ/°                                     | 90.00                                                                        |
| Volume/Å <sup>3</sup>                   | 3737.6(2)                                                                    |
| Z                                       | 8                                                                            |
| ρ <sub>calc</sub> / mg mm <sup>-3</sup> | 1.437                                                                        |

|                                                                |                                                                       |
|----------------------------------------------------------------|-----------------------------------------------------------------------|
| $\mu/\text{mm}^{-1}$                                           | 0.106                                                                 |
| F(000)                                                         | 1680                                                                  |
| Crystal size/ $\text{mm}^3$                                    | 0.34*0.33*0.15                                                        |
| 2 $\theta$ range for data collection                           | 6.1 to 52 °                                                           |
| Index ranges                                                   | -16 $\leq$ h $\leq$ 18, -10 $\leq$ k $\leq$ 6, -33 $\leq$ l $\leq$ 35 |
| Reflections collected                                          | 10777                                                                 |
| Independent reflections                                        | 3611[R(int) = 0.0461 (inf-0.9Å)]                                      |
| Data/restraints/parameters                                     | 3611/0/272                                                            |
| Goodness-of-fit on F <sup>2</sup>                              | 1.045                                                                 |
| Final R indexes [ $I > 2\sigma(I)$ i.e. $F_o > 4\sigma(F_o)$ ] | R <sub>1</sub> = 0.0431, wR <sub>2</sub> = 0.0920                     |
| Final R indexes [all data]                                     | R <sub>1</sub> = 0.0611, wR <sub>2</sub> = 0.1028                     |
| Largest diff. peak/hole / e Å <sup>-3</sup>                    | 0.197/-0.221                                                          |
| Flack Parameters                                               | N                                                                     |
| Completeness                                                   | 0.9955                                                                |

#### 4. <sup>1</sup>H, <sup>19</sup>F NMR, <sup>13</sup>C NMR, and HRMS Data

##### *N*-(4-(difluoro(4-methoxyphenyl)methyl)quinolin-8-yl)benzamide (3a).

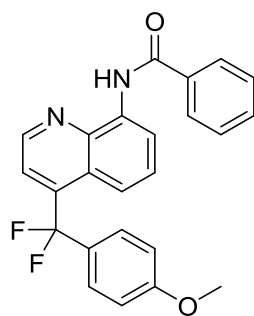

White solid, M.p.:149-150oC;

<sup>1</sup>H NMR (600 MHz, CDCl<sub>3</sub>)  $\delta$  10.84 (s, 1H), 8.98 (d, J = 4.5 Hz, 1H), 8.93 (dd, J = 7.7, 1.2 Hz, 1H), 8.12-8.08 (m, 2H), 7.82 (d, J = 4.4 Hz, 1H), 7.63 (d, J = 8.6 Hz, 1H), 7.61-7.52 (m, 4H), 7.39 (d, J = 6 Hz, 2H), 6.91 (d, J = 8.8 Hz, 2H), 3.82 (s, 3H). <sup>19</sup>F NMR (377 MHz, CDCl<sub>3</sub>)  $\delta$  -84.40. <sup>13</sup>C NMR (151 MHz, CDCl<sub>3</sub>)  $\delta$  165.55, 161.23, 147.30, 139.18, 135.00, 134.92, 131.96, 128.82, 128.38, 127.54 (t, J = 5.0 Hz), 127.36, 127.11, 124.38, 120.27, 119.62 (d, J = 2.8 Hz), 119.29 (t, J = 7.5 Hz), 117.17, 114.01, 113.65, 55.36. HRMS(ESI) calcd. for C<sub>24</sub>H<sub>18</sub>F<sub>2</sub>N<sub>2</sub>O<sub>2</sub> [M+H]<sup>+</sup> 405.1409, found 405.1409.

##### **4-chloro-N-(4-(difluoro(4-methoxyphenyl)methyl)quinolin-8-yl)benzamide (3b)**

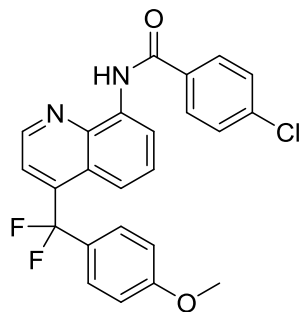

White solid, M.p.: 156-157°C;

**<sup>1</sup>H NMR** (600 MHz, CDCl<sub>3</sub>) δ 10.80 (s, 1H), 8.97 (d, *J* = 4.5 Hz, 1H), 8.90 (dd, *J* = 7.6, 1.2 Hz, 1H), 8.03 (d, *J* = 8.6 Hz, 2H), 7.81 (d, *J* = 4.5 Hz, 1H), 7.63 (d, *J* = 8.7 Hz, 1H), 7.53 (d, *J* = 8.5 Hz, 3H), 7.39 (d, *J* = 8.7 Hz, 2H), 6.91 (d, *J* = 8.8 Hz, 2H), 3.82 (s, 3H). **<sup>19</sup>F NMR** (377 MHz, CDCl<sub>3</sub>) δ -84.41. **<sup>13</sup>C NMR** (151 MHz, CDCl<sub>3</sub>) δ 164.33, 161.23, 147.51, 142.05 (d, *J* = 24.1 Hz), 139.32, 138.25, 134.77, 133.43, 129.10, 128.73, 128.43, 128.26, 127.54 (t, *J* = 5.1 Hz), 124.31, 120.28, 119.77, 119.37 (t, *J* = 7.4 Hz), 116.84, 114.00, 55.36. **HRMS(ESI)** calcd. for C<sub>24</sub>H<sub>17</sub>ClF<sub>2</sub>N<sub>2</sub>O<sub>2</sub> [M+H]<sup>+</sup> 439.1019, found 439.1015.

**Methyl 4-((4-(difluoro(4-methoxyphenyl)methyl)quinolin-8-yl)carbamoyl)benzoate (3c)**

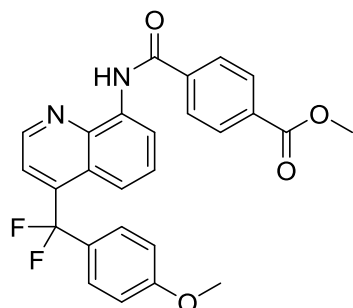

White solid, M.p.: 142-143°C;

**<sup>1</sup>H NMR** (600 MHz, CDCl<sub>3</sub>) δ 10.87 (s, 1H), 8.97 (d, *J* = 4.4 Hz, 1H), 8.92 (d, *J* = 7.7 Hz, 1H), 8.22 (d, *J* = 8.4 Hz, 2H), 8.14 (d, *J* = 8.5 Hz, 2H), 7.80 (d, *J* = 4.5 Hz, 1H), 7.64 (dd, *J* = 8.9, 1.5 Hz, 1H), 7.55-7.50 (m, 1H), 7.39 (d, *J* = 8.7 Hz, 2H), 6.91 (d, *J* = 8.9 Hz, 2H), 3.98 (s, 3H), 3.82 (s, 3H). **<sup>19</sup>F NMR** (377 MHz, CDCl<sub>3</sub>) δ -84.41. **<sup>13</sup>C NMR** (151 MHz, CDCl<sub>3</sub>) δ 166.27, 164.44, 161.22, 147.63, 141.87, 139.41, 138.87, 134.73, 133.07, 130.08, 128.43, 128.21, 127.54 (t, *J* = 5.1 Hz), 127.32, 124.29, 120.29, 119.91, 119.41 (t, *J* = 7.4 Hz), 116.81, 114.00, 55.36, 52.44. **HRMS(ESI)** calcd. for C<sub>26</sub>H<sub>20</sub>F<sub>2</sub>N<sub>2</sub>O<sub>4</sub> [M+H]<sup>+</sup> 463.1464, found 463.1463.

**N-(4-(difluoro(4-methoxyphenyl)methyl)quinolin-8-yl)-4-ethylbenzamide (3d).**

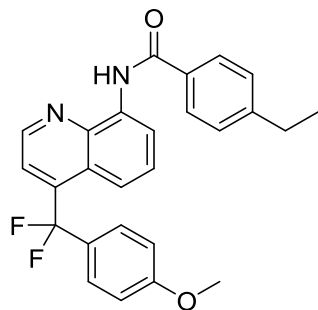

White solid, M.p.: 161-162°C;

**<sup>1</sup>H NMR** (600 MHz, CDCl<sub>3</sub>) δ 10.81 (s, 1H), 8.98 (d, *J* = 4.4 Hz, 1H), 8.92 (d, *J* = 7.6 Hz, 1H), 8.03 (d, *J* = 7.8 Hz, 2H), 7.83 (d, *J* = 4.2 Hz, 1H), 7.63 (d, *J* = 8.7 Hz, 1H), 7.54 (t, *J* = 8.1 Hz, 1H), 7.39 (dd, *J* = 8.4, 3.9 Hz, 4H), 6.91 (d, *J* = 8.5 Hz, 2H), 3.82 (s, 3H), 2.76 (q, *J* = 7.6 Hz, 2H), 1.30 (t, *J* = 7.6 Hz, 3H). **<sup>19</sup>F NMR** (377 MHz, CDCl<sub>3</sub>) δ -84.40. **<sup>13</sup>C NMR** (151 MHz, cdcl<sub>3</sub>) δ 165.54 (s), 161.20 (s), 148.68 (s), 147.25 (s), 135.04 (s), 132.43 (s), 128.37 (s), 128.29 (s), 127.53 (t, *J* = 5.0 Hz), 127.46 (s), 124.36 (s), 119.55 – 119.37 (m), 119.23 (t, *J* = 7.7 Hz), 116.99 (s), 113.99 (s), 55.36 (s), 28.87 (s), 15.32 (s). **HRMS(ESI)** calcd. for C<sub>26</sub>H<sub>22</sub>F<sub>2</sub>N<sub>2</sub>O<sub>2</sub> [M+H]<sup>+</sup> 433.1722, found 433.1719.

***N*-(4-(difluoro(4-methoxyphenyl)methyl)quinolin-8-yl)-2-methylbenzamide (3e).**

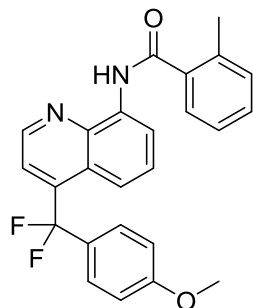

White solid, M.p.: 115-116°C;

**<sup>1</sup>H NMR** (600 MHz, CDCl<sub>3</sub>) δ 10.29 (s, 1H), 8.93 (d, *J* = 7.7 Hz, 1H), 8.88 (d, *J* = 4.4 Hz, 1H), 7.77 (d, *J* = 4.4 Hz, 1H), 7.68 (dd, *J* = 7.5, 1.4 Hz, 1H), 7.61 (dd, *J* = 8.7, 1.5 Hz, 1H), 7.54-7.50 (m, 1H), 7.42 (td, *J* = 7.5, 1.4 Hz, 1H), 7.39 (d, *J* = 8.6 Hz, 2H), 7.36-7.31 (m, 2H), 6.91 (d, *J* = 8.9 Hz, 2H), 3.82 (s, 3H), 2.60 (s, 3H). **<sup>19</sup>F NMR** (377 MHz, CDCl<sub>3</sub>) δ -84.42. **<sup>13</sup>C NMR** (151 MHz, CDCl<sub>3</sub>) δ 168.15, 161.20, 147.45, 141.75, 139.26, 136.71, 136.56, 135.18, 131.41, 130.40, 128.50, 128.21, 127.54 (t, *J* = 5.1 Hz), 127.24, 126.04, 124.28, 120.29, 119.72 – 119.50 (m), 119.26 (t, *J* = 7.5 Hz), 116.65, 113.98, 55.36, 20.19. **HRMS(ESI)** calcd. for C<sub>25</sub>H<sub>20</sub>F<sub>2</sub>N<sub>2</sub>O<sub>2</sub> [M+H]<sup>+</sup> 435.1515, found 435.1502.

***N*-(4-(difluoro(4-methoxyphenyl)methyl)quinolin-8-yl)-3-methylbenzamide (3f)**

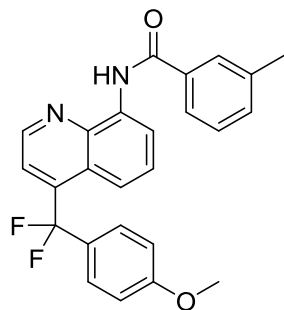

White solid, M.p.: 148-149°C;

**<sup>1</sup>H NMR** (600 MHz, CDCl<sub>3</sub>) δ 10.79 (s, 1H), 8.98 (d, *J* = 4.4 Hz, 1H), 8.93 (d, *J* = 7.6 Hz, 1H), 7.91-7.86 (m, 2H), 7.81 (d, *J* = 4.4 Hz, 1H), 7.62 (d, *J* = 8.6 Hz, 1H), 7.53 (t, *J* = 8.2 Hz, 1H), 7.45 (t, *J* = 7.5 Hz, 1H), 7.42-7.38 (m, 3H), 6.91 (d, *J* = 8.6 Hz, 2H), 3.82 (s, 3H), 2.49 (s, 3H). **<sup>19</sup>F NMR** (377 MHz, CDCl<sub>3</sub>) δ -84.39. **<sup>13</sup>C NMR** (151 MHz, CDCl<sub>3</sub>) δ 165.72, 161.20, 147.36, 141.94, 139.30, 138.70, 135.04, 132.69, 128.65, 128.45, 128.31, 128.10, 127.54 (t, *J* = 5.0 Hz), 124.32, 124.27 (d, *J* = 14.3 Hz), 120.29, 120.29, 119.50, 119.26 (t, *J* = 7.4 Hz), 119.26 (t, *J* = 7.4 Hz), 116.92, 113.99, 55.35, 21.48. **HRMS(ESI)** calcd. for C<sub>25</sub>H<sub>20</sub>F<sub>2</sub>N<sub>2</sub>O<sub>2</sub> [M+H]<sup>+</sup> 419.1566, found 419.1564.

***N*-(4-(difluoro(4-methoxyphenyl)methyl)quinolin-8-yl)-4-methylbenzamide (3g).**

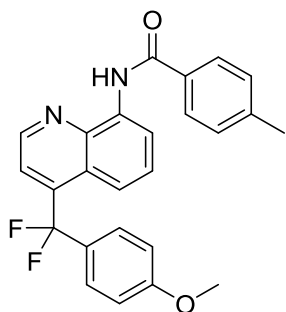

White solid, M.p.: 169-170°C;

**<sup>1</sup>H NMR** (600 MHz, CDCl<sub>3</sub>) δ 10.80 (s, 1H), 8.96 (d, *J* = 4.5 Hz, 1H), 8.93 (dd, *J* = 7.7, 1.2 Hz, 1H), 8.00-7.97 (m, 2H), 7.79 (d, *J* = 4.4 Hz, 1H), 7.60 (dd, *J* = 8.7, 1.6 Hz, 1H), 7.51 (dd, *J* = 8.7, 7.7 Hz, 1H), 7.39 (d, *J* = 8.7 Hz, 2H), 7.38-7.34 (m, 2H), 6.91 (d, *J* = 8.9 Hz, 2H), 3.82 (s, 3H), 2.46 (s, 3H). **<sup>19</sup>F NMR** (377 MHz, CDCl<sub>3</sub>) δ -84.39. **<sup>13</sup>C NMR** (151 MHz, CDCl<sub>3</sub>) δ 165.45, 161.20, 147.41, 142.45, 141.78, 139.43, 135.15, 132.26, 129.49, 128.50, 128.29, 127.55 (t, *J* = 5.1 Hz), 127.31, 124.29, 120.32, 119.37, 119.26 (t, *J* = 7.5 Hz), 116.64, 113.98, 55.35, 21.54. **HRMS(ESI)** calcd. for C<sub>25</sub>H<sub>20</sub>F<sub>2</sub>N<sub>2</sub>O<sub>2</sub> [M+H]<sup>+</sup> 419.1566, found 419.1562.

***N*-(4-(difluoro(4-methoxyphenyl)methyl)quinolin-8-yl)-2-methoxybenzamide (3h).**

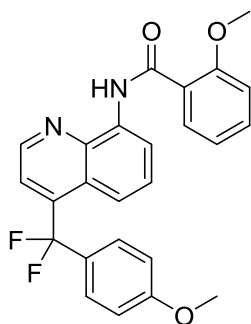

White solid, M.p.: 181-182°C;

**<sup>1</sup>H NMR** (600 MHz, CDCl<sub>3</sub>) δ 12.39 (s, 1H), 9.03 (dd, *J* = 7.8, 1.2 Hz, 1H), 8.99 (d, *J* = 4.4 Hz, 1H), 8.34 (dd, *J* = 7.8, 1.8 Hz, 1H), 7.79 (d, *J* = 4.4 Hz, 1H), 7.57 (dd, *J* = 8.6, 1.5 Hz, 1H), 7.54-7.48 (m, 2H), 7.39 (d, *J* = 8.6 Hz, 2H), 7.17-7.13 (m, 1H), 7.10 (dd, *J* = 8.3, 1.0 Hz, 1H), 6.92-6.88 (m, 2H), 4.22 (s, 3H), 3.81 (s, 3H). **<sup>19</sup>F NMR** (377 MHz, CDCl<sub>3</sub>) δ -84.32. **<sup>13</sup>C NMR** (151 MHz, CDCl<sub>3</sub>) δ 163.63, 161.17, 157.72, 147.35, 141.52, 139.92, 136.21, 133.21, 132.41, 128.62, 128.40, 127.56 (t, *J* = 5.0 Hz),

124.35, 122.33, 121.35, 120.37, 119.24, 119.03 (t,  $J = 7.6$  Hz), 117.46, 113.96, 111.62, 56.14, 55.35. **HRMS(ESI)** calcd. for  $C_{25}H_{20}F_2N_2O_3$   $[M+H]^+$  435.1515, found 435.1508.

***N*-4-(difluoro(4-methoxyphenyl)methyl)quinolin-8-yl)-3-methoxybenzamide (3i).**

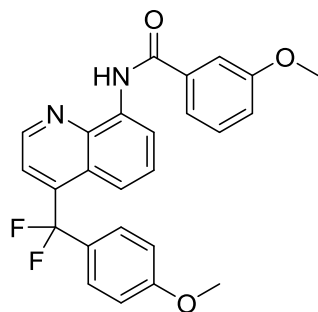

White solid, M.p.: 150-151°C;

**$^1H$  NMR** (600 MHz,  $CDCl_3$ )  $\delta$  10.80 (s, 1H), 8.98 (d,  $J = 4.5$  Hz, 1H), 8.93 (d,  $J = 7.7$  Hz, 1H), 7.92-7.86 (m, 2H), 7.82 (d,  $J = 4.4$  Hz, 1H), 7.63 (d,  $J = 8.7$  Hz, 1H), 7.54 (t,  $J = 8.2$  Hz, 1H), 7.44 (t,  $J = 7.5$  Hz, 1H), 7.42-7.38 (m, 3H), 6.91 (d,  $J = 8.5$  Hz, 2H), 3.82 (s, 3H), 2.49 (s, 3H).  **$^{19}F$  NMR** (377 MHz,  $CDCl_3$ )  $\delta$  -84.39.  **$^{13}C$  NMR** (151 MHz,  $CDCl_3$ )  $\delta$  165.74, 161.22, 147.36, 141.98, 139.29, 138.71, 135.04, 132.70, 128.66, 128.46, 128.33, 128.11, 127.55 (t,  $J = 5.1$  Hz), 124.24, 121.90, 120.30, 119.51, 119.27 (t,  $J = 7.4$  Hz), 118.70, 116.97, 114.00, 55.36, 21.48. **HRMS(ESI)** calcd for  $C_{25}H_{20}F_2N_2O_3$   $[M+H]^+$  435.1515, found 435.1503.

***N*-4-(difluoro(4-methoxyphenyl)methyl)quinolin-8-yl)-4-methoxybenzamide (3j).**

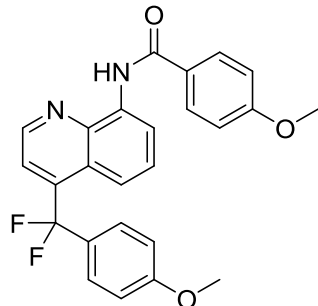

White solid, M.p.: 179-180°C;

**$^1H$  NMR** (600 MHz,  $CDCl_3$ )  $\delta$  10.75 (s, 1H), 8.96 (d,  $J = 4.4$  Hz, 1H), 8.91 (dd,  $J = 7.6, 1.2$  Hz, 1H), 8.08- 8.04 (m, 2H), 7.78 (d,  $J = 4.4$  Hz, 1H), 7.59 (dd,  $J = 8.6, 1.5$  Hz, 1H), 7.52-7.48 (m, 1H), 7.39 (d,  $J = 8.9$  Hz, 2H), 7.07-7.03 (m, 2H), 6.92-6.89 (m, 2H), 3.90 (s, 3H), 3.81 (s, 3H).  **$^{19}F$  NMR** (377 MHz,  $CDCl_3$ )  $\delta$  -84.40.  **$^{13}C$  NMR** (151 MHz,  $CDCl_3$ )  $\delta$  164.99, 162.59, 161.20, 147.37, 141.95, 141.77, 139.42, 135.23, 129.18, 128.69, 128.51, 128.31, 127.55 (t,  $J = 5.1$  Hz), 127.36, 124.29, 120.32, 119.30, 116.53, 114.00 (d,  $J = 5.8$  Hz), 55.48, 55.35. **HRMS(ESI)** calcd. For  $C_{25}H_{20}F_2N_2O_3$   $[M+H]^+$  435.1515, found 435.1561.

***N*-4-(difluoro(4-methoxyphenyl)methyl)quinolin-8-yl)furan-2-carboxamide (3k)**



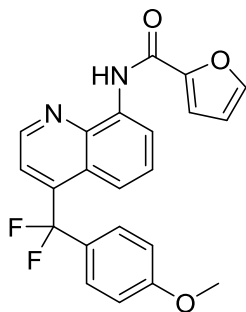

White solid, M.p.: 150-151°C;

**<sup>1</sup>H NMR** (600 MHz, CDCl<sub>3</sub>) δ 10.68 (s, 1H), 8.97 (d, *J* = 4.4 Hz, 1H), 8.84 (dd, *J* = 7.7, 1.2 Hz, 1H), 7.86 (dd, *J* = 3.7, 1.1 Hz, 1H), 7.80 (d, *J* = 4.4 Hz, 1H), 7.62-7.59 (m, 2H), 7.52-7.48 (m, 1H), 7.39 (d, *J* = 8.8 Hz, 2H), 7.20 (dd, *J* = 5.0, 3.7 Hz, 1H), 6.91 (d, *J* = 8.8 Hz, 2H), 3.82 (s, 3H). **<sup>19</sup>F NMR** (377 MHz, CDCl<sub>3</sub>) δ -84.41. **<sup>13</sup>C NMR** (151 MHz, CDCl<sub>3</sub>) δ 161.21, 159.98, 147.49, 141.85, 139.96, 139.13, 134.76, 131.03, 128.49 (d, *J* = 10.1 Hz), 128.27, 127.89, 127.54 (t, *J* = 5.1 Hz), 124.28, 121.89, 120.29, 119.63- 119.45 (m), 119.33 (t, *J* = 7.5 Hz), 116.70, 114.00, 55.36. **HRMS(ESI)** calcd. For C<sub>22</sub>H<sub>16</sub>F<sub>2</sub>N<sub>2</sub>O<sub>3</sub> [M+H]<sup>+</sup> 395.1163, found 395.1161.

***N*-(4-(difluoro(4-methoxyphenyl)methyl)quinolin-8-yl)thiophene-2-carboxamide (3l).**

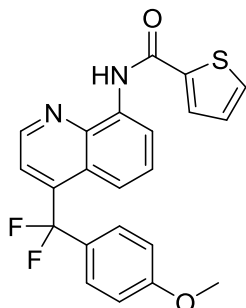

White solid, M.p.: 168-169°C;

**<sup>1</sup>H NMR** (600 MHz, CDCl<sub>3</sub>) δ 10.86 (s, 1H), 9.00 (d, *J* = 4.4 Hz, 1H), 8.87 (dd, *J* = 7.7, 1.2 Hz, 1H), 7.79 (d, *J* = 4.5 Hz, 1H), 7.64 (d, *J* = 0.9 Hz, 1H), 7.61 (dd, *J* = 8.7, 1.6 Hz, 1H), 7.50 (t, *J* = 8.2 Hz, 1H), 7.39 (d, *J* = 8.5 Hz, 2H), 7.32 (d, *J* = 3.4 Hz, 1H), 6.91 (d, *J* = 8.8 Hz, 2H), 6.60 (dd, *J* = 3.4, 1.7 Hz, 1H), 3.82 (s, 3H). **<sup>19</sup>F NMR** (377 MHz, CDCl<sub>3</sub>) δ -84.40. **<sup>13</sup>C NMR** (151 MHz, CDCl<sub>3</sub>) δ 161.20, 156.35, 148.29, 147.57, 144.57, 141.75, 139.28, 134.66, 128.48, 128.19, 127.55 (t, *J* = 5.0 Hz), 124.29, 120.32, 119.63 (d, *J* = 2.9 Hz), 119.33 (t, *J* = 7.4 Hz), 116.82, 115.25, 113.99, 112.48, 55.35. **HRMS(ESI)** calcd for C<sub>22</sub>H<sub>16</sub>F<sub>2</sub>N<sub>2</sub>O<sub>2</sub>S [M+H]<sup>+</sup> 411.0973, found 411.0964.

***N*-(4-(difluoro(4-methoxyphenyl)methyl)quinolin-8-yl)isonicotinamide (3m).**

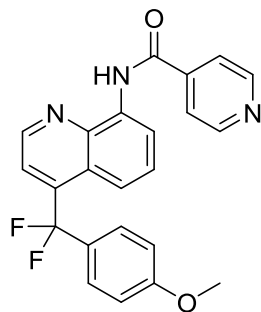

White solid, M.p.: 173-174°C;

**<sup>1</sup>H NMR** (600 MHz, CDCl<sub>3</sub>) δ 10.92 (s, 1H), 8.97 (d, *J* = 4.4 Hz, 1H), 8.90 (t, *J* = 5.7 Hz, 3H), 7.97 (d, *J* = 6.2 Hz, 2H), 7.81 (d, *J* = 4.5 Hz, 1H), 7.68 (dd, *J* = 8.6, 1.6 Hz, 1H), 7.53 (t, *J* = 8.2 Hz, 1H), 7.39 (d, *J* = 8.6 Hz, 2H), 6.91 (d, *J* = 8.6 Hz, 2H), 3.82 (s, 3H). **<sup>19</sup>F NMR** (377 MHz, CDCl<sub>3</sub>) δ -84.43. **<sup>13</sup>C NMR** (151 MHz, CDCl<sub>3</sub>) δ 163.18, 161.23, 150.66, 147.75, 142.1, 141.98, 139.32, 134.27, 128.35, 128.15, 127.51 (t, *J* = 5.1 Hz), 124.28, 121.07, 120.33, 120.24, 119.51 (t, *J* = 7.3 Hz), 117.01, 114.01, 55.36. **HRMS(ESI)** calcd. for C<sub>23</sub>H<sub>17</sub>F<sub>2</sub>N<sub>3</sub>O<sub>2</sub> [M+H]<sup>+</sup> 406.1362, found 406.1360.

***N*-(4-(difluoro(4-methoxyphenyl)methyl)quinolin-8-yl)pivalamide (3n).**

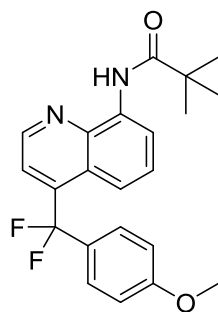

White solid, M.p.: 155-156°C;

**<sup>1</sup>H NMR** (600 MHz, CDCl<sub>3</sub>) δ 10.34 (s, 1H), 8.93 (d, *J* = 4.4 Hz, 1H), 8.78 (dd, *J* = 7.8, 1.2 Hz, 1H), 7.76 (d, *J* = 4.4 Hz, 1H), 7.54 (dd, *J* = 8.6, 1.6 Hz, 1H), 7.44 (t, *J* = 8.2 Hz, 1H), 7.37 (d, *J* = 8.5 Hz, 2H), 6.89 (d, *J* = 8.8 Hz, 2H), 3.81 (s, 3H), 1.43 (s, 9H). **<sup>19</sup>F NMR** (377 MHz, CDCl<sub>3</sub>) δ -84.43. **<sup>13</sup>C NMR** (151 MHz, CDCl<sub>3</sub>) δ 177.22, 161.17, 147.38, 141.64, 139.45, 135.16, 128.54, 128.23, 127.53 (t, *J* = 5.1 Hz), 124.20 (d, *J* = 2.3 Hz), 121.90, 120.30, 119.25 – 118.97 (m), 116.33, 113.95, 55.34, 40.38, 27.71. **HRMS(ESI)** calcd. for C<sub>22</sub>H<sub>22</sub>F<sub>2</sub>N<sub>2</sub>O<sub>2</sub> [M+H]<sup>+</sup> 385.1722, found 385.1721.

***N*-(4-(difluoro(4-methoxyphenyl)methyl)quinolin-8-yl)cyclohexanecarboxamide (3o)**

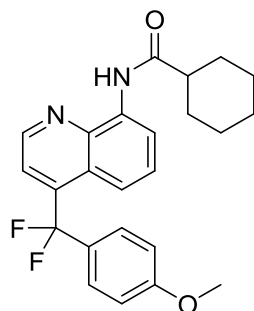

White solid, M.p.: 166-167°C;

**<sup>1</sup>H NMR** (600 MHz, CDCl<sub>3</sub>) δ 10.00 (s, 1H), 8.92 (d, *J* = 4.5 Hz, 1H), 8.79 (dd, *J* = 7.8, 1.3 Hz, 1H), 7.77 (d, *J* = 4.5 Hz, 1H), 7.57-7.53 (m, 1H), 7.45 (t, *J* = 8.2 Hz, 1H), 7.37 (d, *J* = 8.7 Hz, 2H), 6.89 (d, *J* = 8.8 Hz, 2H), 3.81 (s, 3H), 2.50 (tt, *J* = 11.8, 3.5 Hz, 1H), 2.08 (dd, *J* = 13.7, 2.9 Hz, 2H), 1.88 (dt, *J* = 13.0, 3.5 Hz, 2H), 1.77 – 1.72 (m, 1H), 1.63 (qd, *J* = 12.4, 3.5 Hz, 2H), 1.40 (qt, *J* = 12.7, 3.4 Hz, 2H), 1.32 (tt, *J* = 12.5, 3.3 Hz, 1H). **<sup>19</sup>F NMR** (377 MHz, CDCl<sub>3</sub>) δ -84.42. **<sup>13</sup>C NMR** (151 MHz, CDCl<sub>3</sub>) δ 174.87, 161.19, 147.19, 139.06, 135.07, 128.49, 128.27, 127.52 (t, *J* = 5.1 Hz), 124.23, 120.28, 119.18, 119.13, 119.08, 116.65, 113.97, 55.35, 46.90, 29.74, 25.77, 25.74. **HRMS(ESI)** calcd. for C<sub>24</sub>H<sub>24</sub>F<sub>2</sub>N<sub>2</sub>O<sub>2</sub> [M+H]<sup>+</sup> 411.1879, found 411.1877.

***N*-(4-(difluoro(4-methoxyphenyl)methyl)-2-methylquinolin-8-yl)benzamide (3p).**

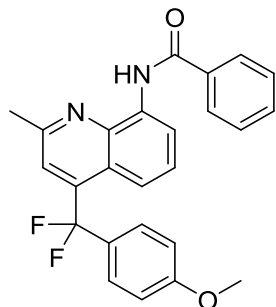

White solid, M.p.: 151-152°C;

**<sup>1</sup>H NMR** (600 MHz, CDCl<sub>3</sub>) δ 10.92 (s, 1H), 8.87 (dd, *J* = 7.7, 1.2 Hz, 1H), 8.11-8.08 (m, 2H), 7.68 (s, 1H), 7.62-7.53 (m, 4H), 7.44 (t, *J* = 8.2 Hz, 1H), 7.39 (d, *J* = 8.6 Hz, 2H), 6.91 (d, *J* = 8.8 Hz, 2H), 3.82 (s, 3H), 2.87 (s, 3H). **<sup>19</sup>F NMR** (377 MHz, CDCl<sub>3</sub>) δ -84.37. **<sup>13</sup>C NMR** (151 MHz, CDCl<sub>3</sub>) δ 165.36, 161.17, 156.58, 138.82, 135.20, 134.27, 131.84, 128.82, 128.52, 127.54 (t, *J* = 5.1 Hz), 127.28, 127.18, 122.53, 120.28, 120.10 (t, *J* = 7.5 Hz), 119.50, 117.03, 117.00, 113.96, 55.35, 25.47. **HRMS(ESI)** calcd. for C<sub>25</sub>H<sub>20</sub>F<sub>2</sub>N<sub>2</sub>O<sub>2</sub> [M+H]<sup>+</sup> 419.1566, found 419.1564.

***N*-(4-(difluoro(4-methoxyphenyl)methyl)-6-methoxyquinolin-8-yl)benzamide (3q)**

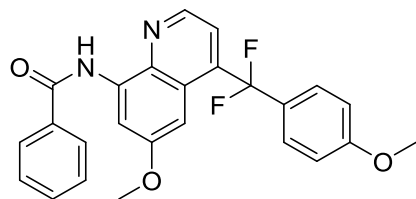

White solid, M.p.: 122-123°C;

**<sup>1</sup>H NMR** (600 MHz, CDCl<sub>3</sub>) δ 10.80 (s, 1H), 8.78 (d, *J* = 4.5 Hz, 1H), 8.67 (d, *J* = 2.6 Hz, 1H), 8.11 – 8.06 (m, 2H), 7.75 (d, *J* = 4.5 Hz, 1H), 7.62-7.53 (m, 3H), 7.41 (d, *J* = 8.8 Hz, 2H), 6.91 (d, *J* = 8.9 Hz, 2H), 6.89 (d, *J* = 2.2 Hz, 1H), 3.82 (s, 3H), 3.77 (s, 3H). **<sup>13</sup>C NMR** (151 MHz, CDCl<sub>3</sub>) δ 160.66, 156.38, 154.01, 139.90, 135.35, 131.33, 131.13, 130.16, 127.22, 124.07, 122.74 (t, *J* = 5.1 Hz), 122.53, 120.64, 114.96 (t, *J* = 7.6 Hz), 109.20, 104.08, 94.00, 72.47, 72.25, 72.04, 50.68. **<sup>19</sup>F NMR** (565 MHz, CDCl<sub>3</sub>) δ -85.95. **HRMS(ESI)** calcd. for C<sub>25</sub>H<sub>20</sub>F<sub>2</sub>N<sub>2</sub>O<sub>3</sub> [M+H]<sup>+</sup> 435.1515, found 435.1517.

***N*-(4-(difluoro(4-methoxyphenyl)methyl)-5-iodoquinolin-8-yl)benzamide (3r)**

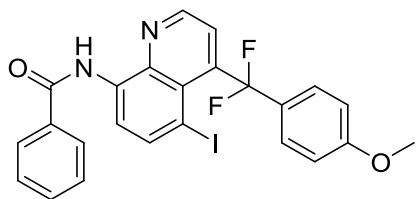

White solid, M.p.: 132-133°C;

**<sup>1</sup>H NMR** (600 MHz, CDCl<sub>3</sub>) δ 10.31 (s, 1H), 8.74 (d, J = 8.3 Hz, 1H), 8.56 (d, J = 8.7 Hz, 1H), 8.17 (d, J = 8.3 Hz, 1H), 8.03 (d, J = 8.7 Hz, 1H), 7.76 (d, J = 7.4 Hz, 2H), 7.59 (dd, J = 14.5, 8.0 Hz, 3H), 7.51 (t, J = 7.7 Hz, 2H), 6.99 (d, J = 8.7 Hz, 2H), 3.83 (s, 3H). **<sup>13</sup>C NMR** (151 MHz, CDCl<sub>3</sub>) δ 164.99, 160.89, 154.30, 142.56, 139.55, 137.79, 135.69, 134.25, 132.10, 129.68, 128.80, 128.08, 127.67 (t, J = 5.9 Hz), 127.10, 119.75, 118.47, 113.74, 88.84, 55.33. **<sup>19</sup>F NMR** (565 MHz, CDCl<sub>3</sub>) δ -90.50. **HRMS(ESI)** calcd. for C<sub>24</sub>H<sub>17</sub>F<sub>2</sub>IN<sub>2</sub>O<sub>2</sub> [M+Na]<sup>+</sup> 553.0195, found 553.0200.

### 8-benzamido-4-(difluoro(2-methoxyphenyl)methyl)quinolin-5-yl acetate (3s)

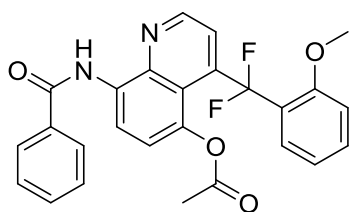

White solid, M.p.: 154-155°C;

**<sup>1</sup>H NMR** (600 MHz, CDCl<sub>3</sub>) δ 10.87 (s, 1H), 9.05 (d, J = 8.6 Hz, 1H), 8.98 (d, J = 4.5 Hz, 1H), 8.09 (d, J = 6.9 Hz, 1H), 7.89 (d, J = 4.6 Hz, 1H), 7.63-7.55 (m, 3H), 7.29 (dd, J = 8.7, 4.5 Hz, 3H), 6.90 (d, J = 8.8 Hz, 2H), 3.83 (s, 3H), 1.94 (s, 3H). **<sup>13</sup>C NMR** (151 MHz, CDCl<sub>3</sub>) δ 169.71, 165.36, 161.14, 147.57, 140.00, 139.06, 134.98, 133.56, 131.98, 129.42, 128.84, 127.60 (t, J = 4.1 Hz), 127.28, 123.90, 121.74 (t, J = 10.2 Hz), 120.64, 116.84, 113.70, 55.36, 20.93. **<sup>19</sup>F NMR** (565 MHz, CDCl<sub>3</sub>) δ -76.59. -90.45. **HRMS(ESI)** calcd. for C<sub>26</sub>H<sub>20</sub>F<sub>2</sub>IN<sub>2</sub>O<sub>4</sub> [M+H]<sup>+</sup> 463.1464, found 463.1469.

### 8-benzamido-4-(difluoro(2-methoxyphenyl)methyl)-6-methoxyquinolin-5-yl acetate (3t)

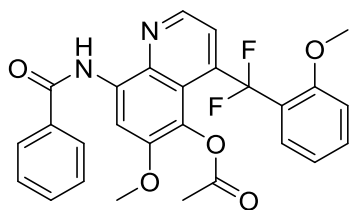

Yellow solid, M.p.: 186-187°C;

**<sup>1</sup>H NMR** (600 MHz, CDCl<sub>3</sub>) δ 10.99 (s, 1H), 9.09 (s, 1H), 8.77 (d, J = 4.5 Hz, 1H), 8.09 (d, J = 8.2 Hz, 2H), 7.77 (d, J = 4.5 Hz, 1H), 7.62-7.55 (m, 3H), 7.45 (t, J = 7.9 Hz, 1H), 7.21 (d, J = 2.6 Hz, 1H), 6.99 (d, J = 8.3 Hz, 1H), 6.94 (d, J = 11.2 Hz, 1H), 4.00 (s, 3H), 3.67 (s, 3H), 1.97 (s, 3H). **<sup>13</sup>C NMR** (151 MHz, CDCl<sub>3</sub>) δ 169.72, 165.36, 161.15, 147.59, 140.03, 139.06, 134.99, 133.58, 132.32, 131.99, 128.85, 128.77, 127.61 (t, J = 4.2 Hz), 127.28, 127.08, 123.89, 121.74 (t, J = 8.8 Hz), 120.74, 119.28, 116.80,

116.58, 113.70, 55.37, 29.68, 20.93.  $^{19}\text{F}$  NMR (565 MHz,  $\text{CDCl}_3$ )  $\delta$  -93.54. HRMS(ESI) calcd. for  $\text{C}_{27}\text{H}_{22}\text{F}_2\text{N}_2\text{O}_5$   $[\text{M}+\text{H}]^+$  493.1570, found 493.1575.

***N*-4-(difluoro(2-methoxyphenyl)methyl)quinolin-8-yl)benzamide (3u).**

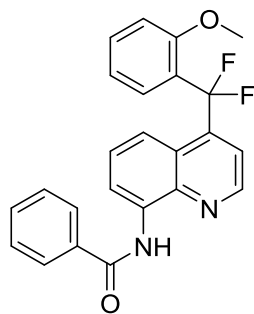

White solid, M.p.: 159-160°C;

$^1\text{H}$  NMR (600 MHz,  $\text{CDCl}_3$ )  $\delta$  10.85 (s, 1H), 8.93 (d,  $J = 4.5$  Hz, 1H), 8.90 (dd,  $J = 7.7, 1.1$  Hz, 1H), 8.10-8.07 (m, 2H), 7.83 (dd,  $J = 7.6, 1.5$  Hz, 1H), 7.81 (d,  $J = 4.5$  Hz, 1H), 7.72 (dd,  $J = 8.7, 1.5$  Hz, 1H), 7.61-7.54 (m, 3H), 7.52-7.48 (m, 1H), 7.46 (td,  $J = 7.9, 1.7$  Hz, 1H), 7.12 (t,  $J = 7.6$  Hz, 1H), 6.88 (d,  $J = 8.3$  Hz, 1H), 3.52 (s, 3H).  $^{19}\text{F}$  NMR (377 MHz,  $\text{CDCl}_3$ )  $\delta$  -88.73.  $^{13}\text{C}$  NMR (151 MHz,  $\text{CDCl}_3$ )  $\delta$  165.43, 157.08, 147.23, 142.46, 139.36, 135.15, 134.94, 132.37 (d,  $J = 1.9$  Hz), 131.87, 128.80, 127.88, 127.29, 127.15 (t,  $J = 7.4$  Hz), 124.39, 124.14, 120.60, 119.84 (t,  $J = 7.6$  Hz), 119.23, 118.99 (d,  $J = 2.6$  Hz), 116.40, 112.25, 55.37. HRMS(ESI) calcd. for  $\text{C}_{24}\text{H}_{18}\text{F}_2\text{N}_2\text{O}_2$   $[\text{M}+\text{H}]^+$  405.1409, found 405.1406.

***N*-4-(difluoro(3-methoxyphenyl)methyl)quinolin-8-yl)benzamide (3v).**

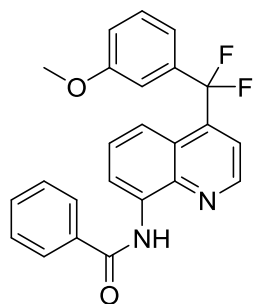

White solid, M.p.: 181-182°C;

$^1\text{H}$  NMR (600 MHz,  $\text{CDCl}_3$ )  $\delta$  10.83 (s, 1H), 8.97 (d,  $J = 4.5$  Hz, 1H), 8.94 (d,  $J = 7.7$  Hz, 1H), 8.09 (d,  $J = 7.0$  Hz, 2H), 7.79 (d,  $J = 4.4$  Hz, 1H), 7.65 (d,  $J = 8.7$  Hz, 1H), 7.56 (ddd,  $J = 22.0, 15.6, 7.7$  Hz, 4H), 7.32 (t,  $J = 8.0$  Hz, 1H), 7.08 (s, 1H), 7.00 (t,  $J = 7.8$  Hz, 2H), 3.81 (s, 3H).  $^{19}\text{F}$  NMR (377 MHz,  $\text{CDCl}_3$ )  $\delta$  -86.51.  $^{13}\text{C}$  NMR (151 MHz,  $\text{CDCl}_3$ )  $\delta$  165.46, 159.75, 147.43, 141.56, 139.41, 137.59, 135.07, 131.93, 129.90, 128.83, 128.37, 127.30, 124.20, 120.03, 119.37, 119.32, 119.27, 118.26 (t,  $J = 5.4$  Hz), 116.79, 116.02, 111.71 (t,  $J = 5.4$  Hz), 55.39. HRMS(ESI) calcd. for  $\text{C}_{24}\text{H}_{18}\text{F}_2\text{N}_2\text{O}_2$   $[\text{M}+\text{H}]^+$  405.1409, found 405.1409.

***N*-4-((2-(benzyloxy)phenyl)difluoromethyl)quinolin-8-yl)benzamide (3w).**

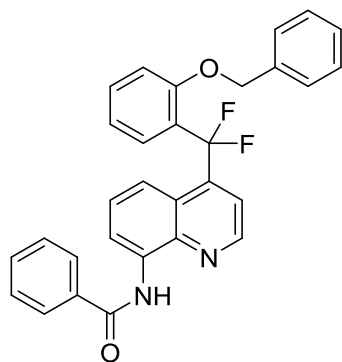

White solid, M.p.: 162-163°C;

**<sup>1</sup>H NMR** (600 MHz, CDCl<sub>3</sub>) δ 10.83 (s, 1H), 8.88 (d, *J* = 7.7 Hz, 1H), 8.57 (d, *J* = 4.6 Hz, 1H), 8.10 (d, *J* = 7.4 Hz, 2H), 7.96 – 7.94 (m, 1H), 7.66 (d, *J* = 8.7 Hz, 1H), 7.63 (d, *J* = 4.6 Hz, 1H), 7.61-7.55 (m, 3H), 7.46 (dt, *J* = 19.6, 7.9 Hz, 2H), 7.30 (d, *J* = 7.2 Hz, 1H), 7.27 (d, *J* = 1.8 Hz, 1H), 7.26-7.24 (m, 1H), 7.16 (t, *J* = 7.6 Hz, 1H), 6.93 – 6.90 (m, 3H), 4.75 (s, 2H). **<sup>19</sup>F NMR** (377 MHz, CDCl<sub>3</sub>) δ -88.92. **<sup>13</sup>C NMR** (151 MHz, CDCl<sub>3</sub>) δ 165.42, 155.99, 147.22, 142.24, 139.07, 135.47, 135.14, 134.88, 132.31, 131.88, 128.81, 128.39, 128.12, 127.78, 127.68, 127.31 (d, *J* = 1.6 Hz), 127.09 (t, *J* = 7.4 Hz), 124.58, 124.05, 120.75, 120.43, 120.04 (t, *J* = 7.8 Hz), 118.78, 116.36, 112.92, 70.25. **HRMS(ESI)** calcd. for C<sub>30</sub>H<sub>22</sub>F<sub>2</sub>N<sub>2</sub>O<sub>2</sub> [M+H]<sup>+</sup> 481.1722, found 481.1716.

***N*-(4-((3-(benzyloxy)phenyl)difluoromethyl)quinolin-8-yl)benzamide (3x).**

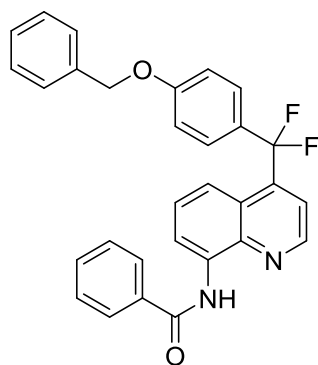

White solid, M.p.: 152-153°C;

**<sup>1</sup>H NMR** (600 MHz, CDCl<sub>3</sub>) δ 10.83 (s, 1H), 8.97 (d, *J* = 4.5 Hz, 1H), 8.94 (dd, *J* = 7.6, 1.2 Hz, 1H), 8.09 (dd, *J* = 6.9, 1.6 Hz, 2H), 7.80 (d, *J* = 4.5 Hz, 1H), 7.64-7.50 (m, 5H), 7.43-7.36 (m, 6H), 7.35-7.32 (m, 1H), 7.00-6.97 (m, 2H), 5.07 (s, 2H). **<sup>19</sup>F NMR** (377 MHz, CDCl<sub>3</sub>) δ -84.45. **<sup>13</sup>C NMR** (151 MHz, CDCl<sub>3</sub>) δ 165.45, 160.41, 147.49, 141.73, 139.47, 136.29, 135.09 (d, *J* = 3.8 Hz), 131.93, 128.84, 128.74, 128.66, 128.56, 128.28, 128.20, 127.59 (t, *J* = 4.9 Hz), 127.48, 127.29, 124.28, 120.29, 119.51 (d, *J* = 2.9 Hz), 119.31 (t, *J* = 7.4 Hz), 116.66, 114.86, 70.13. **HRMS(ESI)** calcd. for C<sub>30</sub>H<sub>22</sub>F<sub>2</sub>N<sub>2</sub>O<sub>2</sub> [M+H]<sup>+</sup> 481.1722, found 481.1718.

***N*-(4-(difluoro(4-(methylthio)phenyl)methyl)quinolin-8-yl)benzamide (3y).**

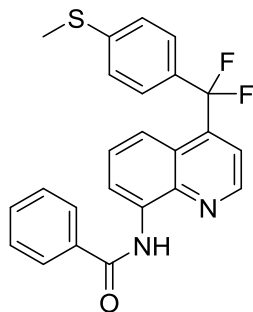

White solid, M.p.: 99-100°C;

**<sup>1</sup>H NMR** (600 MHz, CDCl<sub>3</sub>) δ 10.82 (s, 1H), 8.97 (d, *J* = 4.4 Hz, 1H), 8.94 (d, *J* = 7.7 Hz, 1H), 8.09 (d, *J* = 7.1 Hz, 2H), 7.79 (d, *J* = 4.5 Hz, 1H), 7.62-7.58 (m, 2H), 7.56 (t, *J* = 7.2 Hz, 2H), 7.53 (t, *J* = 8.2 Hz, 1H), 7.38 (d, *J* = 8.3 Hz, 2H), 7.25 (d, *J* = 8.3 Hz, 2H), 2.48 (s, 3H). **<sup>19</sup>F NMR** (377 MHz, CDCl<sub>3</sub>) δ -85.78. **<sup>13</sup>C NMR** (151 MHz, CDCl<sub>3</sub>) δ 165.45, 147.48, 142.44, 141.44, 139.46, 135.09 (d, *J* = 5.8 Hz), 134.16, 132.55, 131.94, 128.84, 128.38, 127.29, 126.32 (t, *J* = 5.2 Hz), 125.73, 124.17, 120.16, 119.37, 119.29 (d, *J* = 7.5 Hz), 116.72, 15.05. **HRMS(ESI)** calcd. for C<sub>24</sub>H<sub>18</sub>F<sub>2</sub>N<sub>2</sub>OS [M+H]<sup>+</sup> 421.1181, found 421.1177.

***N*-(4-(difluoro(mesityl)methyl)quinolin-8-yl)benzamide (3ab).**

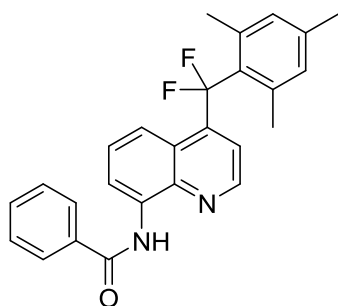

White solid, M.p.: 199-200°C;

**<sup>1</sup>H NMR** (600 MHz, CDCl<sub>3</sub>) δ 10.83 (s, 1H), 9.02 (dd, *J* = 7.6, 1.1 Hz, 1H), 8.77 (d, *J* = 4.5 Hz, 1H), 8.26 (d, *J* = 8.7 Hz, 1H), 8.12 – 8.08 (m, 2H), 7.73 (t, *J* = 8.3 Hz, 1H), 7.62 – 7.54 (m, 3H), 7.09 (d, *J* = 4.4 Hz, 1H), 6.98 (s, 2H), 2.36 (s, 3H), 2.25 (t, *J* = 4.3 Hz, 6H). **<sup>19</sup>F NMR** (377 MHz, CDCl<sub>3</sub>) δ -77.18. **<sup>13</sup>C NMR** (151 MHz, CDCl<sub>3</sub>) δ 165.44, 147.38, 141.83, 141.64, 139.83 (d, *J* = 9.3 Hz), 137.71 (t, *J* = 3.1 Hz), 135.12, 135.03, 131.89, 131.20, 129.12, 128.97, 128.81, 128.51, 127.31, 124.55 (d, *J* = 9.3 Hz), 120.42 (t, *J* = 5.5 Hz), 119.97 (t, *J* = 4.2 Hz), 117.07, 22.51 (t, *J* = 5.9 Hz), 20.84. **HRMS(ESI)** calcd. for C<sub>26</sub>H<sub>22</sub>F<sub>2</sub>N<sub>2</sub>O [M+H]<sup>+</sup> 417.1733, found 417.1774.

***N*-(4-(thiophene-2-carbonyl)quinolin-8-yl)benzamide (3ac).**

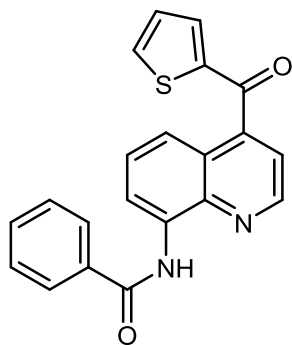

Yellow solid, M.p.: 172-173°C;

$^1\text{H NMR}$  (600 MHz,  $\text{CDCl}_3$ )  $\delta$  10.80 (s, 1H), 9.00 (dd,  $J = 7.7, 1.4$  Hz, 1H), 8.98 (d,  $J = 4.3$  Hz, 1H), 8.12 (d,  $J = 7.0$  Hz, 2H), 7.85 (d,  $J = 4.9$  Hz, 1H), 7.69 (dd,  $J = 8.6, 1.4$  Hz, 1H), 7.65 (d,  $J = 7.8$  Hz, 1H), 7.62 (q,  $J = 3.2$  Hz, 2H), 7.58 (q,  $J = 7.2, 6.8$  Hz, 2H), 7.44 (d,  $J = 3.9$  Hz, 1H), 7.15 (t,  $J = 4.4$  Hz, 1H).  $^{13}\text{C NMR}$  (151 MHz,  $\text{CDCl}_3$ )  $\delta$  187.45, 177.29, 165.50, 147.33 (d,  $J = 2.4$  Hz), 144.48, 143.77, 139.19, 136.42 (d,  $J = 4.1$  Hz), 135.06, 134.93, 131.96, 128.85, 128.73, 128.57, 127.31, 124.53, 119.86, 119.16, 117.17. **HRMS(ESI)** calcd. for  $\text{C}_{21}\text{H}_{14}\text{N}_2\text{O}_2\text{S}$   $[\text{M}+\text{H}]^+$  359.0810, found 359.0852.

***N*-(2-(difluoro(4-methoxyphenyl)methyl)quinolin-4-yl)pivalamide (5a)**

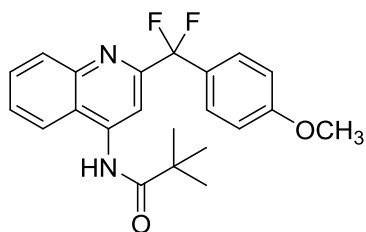

White solid, M.p.: 195-196°C;

$^1\text{H NMR}$  (600 MHz,  $\text{CDCl}_3$ )  $\delta$  8.71 (s, 1H), 8.26 (s, 1H), 8.22 (d,  $J = 8.4$  Hz, 1H), 7.75 (ddd,  $J = 8.4, 6.8, 1.3$  Hz, 1H), 7.72 (dd,  $J = 8.5, 1.3$  Hz, 1H), 7.62 (dd,  $J = 8.0, 6.2$  Hz, 3H), 6.90 (d,  $J = 8.8$  Hz, 2H), 3.80 (s, 3H), 1.44 (s, 9H).  $^{19}\text{F NMR}$  (377 MHz,  $\text{CDCl}_3$ )  $\delta$  -94.11.  $^{13}\text{C NMR}$  (151 MHz,  $\text{CDCl}_3$ )  $\delta$  176.93, 160.73, 156.68, 147.94, 141.49, 131.42, 129.84, 128.94, 127.46, 120.38, 119.60, 118.76, 118.27, 113.69, 107.21 (t,  $J = 4.3$  Hz), 55.28, 40.60, 27.62. **HRMS(ESI)** calcd. for  $\text{C}_{22}\text{H}_{22}\text{F}_2\text{N}_2\text{O}_2$   $[\text{M}+\text{H}]^+$  385.1722, found 385.1717.

***N*-(2-(difluoro(*p*-tolyl)methyl)quinolin-4-yl)pivalamide (5b)**

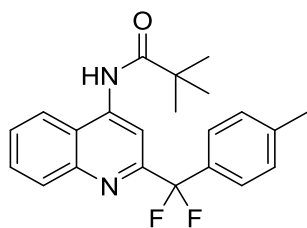

White solid, M.p.: 136-137°C;

$^1\text{H NMR}$  (600 MHz,  $\text{CDCl}_3$ )  $\delta$  8.72 (s, 1H), 8.32 (s, 1H), 8.24 (d,  $J = 8.4$  Hz, 1H), 7.76-7.72 (m, 2H), 7.62 (ddd,  $J = 8.3, 6.7, 1.3$  Hz, 1H), 7.59 (d,  $J = 8.2$  Hz, 2H), 7.20 (d,  $J = 8.0$  Hz, 2H), 2.34 (s, 3H), 1.45



(s, 9H). **<sup>19</sup>F NMR** (377 MHz, CDCl<sub>3</sub>) δ -95.50. **<sup>13</sup>C NMR** (151 MHz, CDCl<sub>3</sub>) δ 176.96, 147.64, 140.00, 131.15, 130.00, 129.04, 127.53, 125.85, 125.81, 125.77, 119.58, 118.68, 118.37, 117.06, 107.17 (d, *J* = 4.4 Hz), 40.63, 27.61, 21.27. **HRMS(ESI)** calcd. for C<sub>22</sub>H<sub>22</sub>F<sub>2</sub>N<sub>2</sub>O [M+H]<sup>+</sup> 369.1773, found 369.1769.

***N*-(2-((4-(benzyloxy)phenyl)difluoromethyl)quinolin-4-yl)pivalamide (5c)**

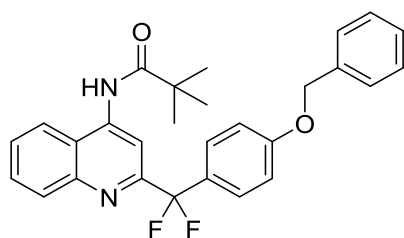

White solid, M.p.: 136-137°C;

**<sup>1</sup>H NMR** (600 MHz, CDCl<sub>3</sub>) δ 8.71 (s, 1H), 8.27 (s, 1H), 8.22 (d, *J* = 8.5 Hz, 1H), 7.76 (ddd, *J* = 8.4, 6.8, 1.3 Hz, 1H), 7.73 (d, *J* = 8.2 Hz, 1H), 7.65-7.61 (m, 3H), 7.42 – 7.39 (m, 2H), 7.37 (td, *J* = 6.6, 6.1, 1.7 Hz, 2H), 7.33-7.30 (m, 1H), 6.99 – 6.96 (m, 2H), 5.06 (s, 2H), 1.44 (s, 9H). **<sup>19</sup>F NMR** (377 MHz, CDCl<sub>3</sub>) δ -94.18. **<sup>13</sup>C NMR** (151 MHz, CDCl<sub>3</sub>) δ 176.93, 159.96, 147.86, 141.58, 136.58, 131.36, 129.90, 129.15, 128.60, 128.04, 127.54, 127.49 (d, *J* = 2.2 Hz), 127.45 (d, *J* = 4.8 Hz), 119.59, 118.70, 118.29, 114.59, 107.19, 70.01, 40.61, 27.62, 1.01. **HRMS(ESI)** calcd. for C<sub>28</sub>H<sub>26</sub>F<sub>2</sub>N<sub>2</sub>O<sub>2</sub> [M+H]<sup>+</sup> 461.2035, found 461.2033

***N*-(2-([1,1'-biphenyl]-4-yl)difluoromethyl)quinolin-4-yl)pivalamide (5d)**

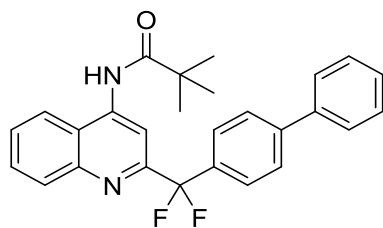

White solid, M.p.: 157-158°C;

**<sup>1</sup>H NMR** (600 MHz, CDCl<sub>3</sub>) δ 8.79 (d, *J* = 5.0 Hz, 1H), 8.39 – 8.19 (m, 2H), 7.79 (d, *J* = 8.5 Hz, 2H), 7.74 (dt, *J* = 21.4, 7.5 Hz, 2H), 7.67-7.60 (m, 3H), 7.58 – 7.55 (m, 2H), 7.45-7.40 (m, 2H), 7.38-7.33 (m, 1H), 1.46 (s, 9H). **<sup>19</sup>F NMR** (377 MHz, CDCl<sub>3</sub>) δ -95.52. **<sup>13</sup>C NMR** (151 MHz, CDCl<sub>3</sub>) δ 176.99, 147.92, 142.82, 141.69, 140.32, 131.38, 129.95, 128.78 (d, *J* = 6.5 Hz), 127.68, 127.57 (d, *J* = 1.9 Hz), 127.19 (d, *J* = 4.3 Hz), 127.13, 126.67, 126.38, 125.54, 119.63, 118.33, 111.42, 107.10 (d, *J* = 4.1 Hz), 40.64, 27.63. **HRMS(ESI)** calcd. for C<sub>27</sub>H<sub>24</sub>F<sub>2</sub>N<sub>2</sub>O [M+H]<sup>+</sup> 431.1929, found 431.1926.

***N*-(2-((2,6-dimethylphenyl)difluoromethyl)quinolin-4-yl)pivalamide (5e)**

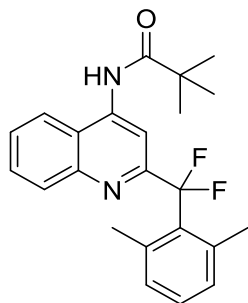

White solid, M.p.: 116-117°C;

**<sup>1</sup>H NMR** (600 MHz, CDCl<sub>3</sub>) δ 8.69 (s, 1H), 8.34 (s, 1H), 8.21 (d, *J* = 8.4 Hz, 1H), 7.78-7.72 (m, 2H), 7.64 (ddd, *J* = 8.2, 6.8, 1.2 Hz, 1H), 7.55 (d, *J* = 8.0 Hz, 1H), 7.07 (d, *J* = 7.4 Hz, 1H), 7.01 (s, 1H), 2.32 (d, *J* = 8.1 Hz, 6H), 1.45 (s, 9H). **<sup>19</sup>F NMR** (377 MHz, CDCl<sub>3</sub>) δ -92.09. **<sup>13</sup>C NMR** (151 MHz, CDCl<sub>3</sub>) δ 176.86, 147.61, 141.59, 139.94, 136.48 (t, *J* = 2.9 Hz), 132.52, 131.38, 129.83, 127.55, 126.76 (t, *J* = 8.3 Hz), 126.22, 119.73, 118.39, 107.76 (t, *J* = 3.7 Hz), 40.60, 27.63, 21.10, 20.34 (t, *J* = 2.6 Hz). **HRMS(ESI)** calcd. for C<sub>23</sub>H<sub>24</sub>F<sub>2</sub>N<sub>2</sub>O [M+H]<sup>+</sup> 383.193, found 383.1928.

***N*-(7-chloro-2-(difluoro(4-methoxyphenyl)methyl)quinolin-4-yl)pivalamide (5f)**

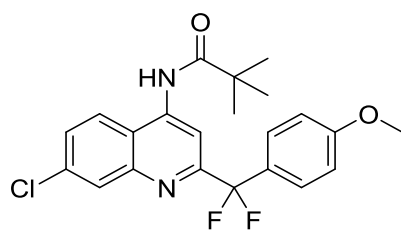

White solid, M.p.: 172-173°C;

**<sup>1</sup>H NMR** (600 MHz, CDCl<sub>3</sub>) δ 8.68 (s, 1H), 8.26 (s, 1H), 8.22 (d, *J* = 2.1 Hz, 1H), 7.67 (d, *J* = 9.0 Hz, 1H), 7.63-7.59 (m, 2H), 7.55 (dd, *J* = 8.9, 2.1 Hz, 1H), 6.93-6.89 (m, 2H), 3.80 (s, 3H), 1.45 (s, 9H). **<sup>19</sup>F NMR** (377 MHz, CDCl<sub>3</sub>) δ -94.82. **<sup>13</sup>C NMR** (151 MHz, CDCl<sub>3</sub>) δ 176.97, 160.81, 157.80, 148.29, 141.95, 136.07, 130.04, 128.55, 128.32, 127.41 (t, *J* = 5.7 Hz), 120.03, 118.55, 118.14, 113.74, 107.54 (t, *J* = 4.1 Hz), 55.29, 40.61, 27.59. **HRMS(ESI)** calcd. for C<sub>22</sub>H<sub>21</sub>ClF<sub>2</sub>N<sub>2</sub>O<sub>2</sub> [M+H]<sup>+</sup> 419.1332, found 419.1328.

---

## 5. References

- [1] J. Li, Y. Wang, Y. Yu, R. -B. Wu, J. Weng, G. Lu, ACS Catal. **2017**, 7, 2661-2667.
- [2] S. Mizuta, I. S. R Stenhagen, M. L. O'Duill, J. R. Wolstenhulme, A. Kirjavainen, S. S. Forsback, M. Tredwell, G. Sandford, P. Moore, M. Huiban, S. Luthra, J. Passchier, O. Solin, V. Gouverneur, Organic letters. **2013**, 15 11, 2648-51.

## 6. Copies of $^1\text{H}$ , $^{19}\text{F}$ and $^{13}\text{C}$ NMR Spectra

3a-H  
STANDARD 1H OBSERVE - profile

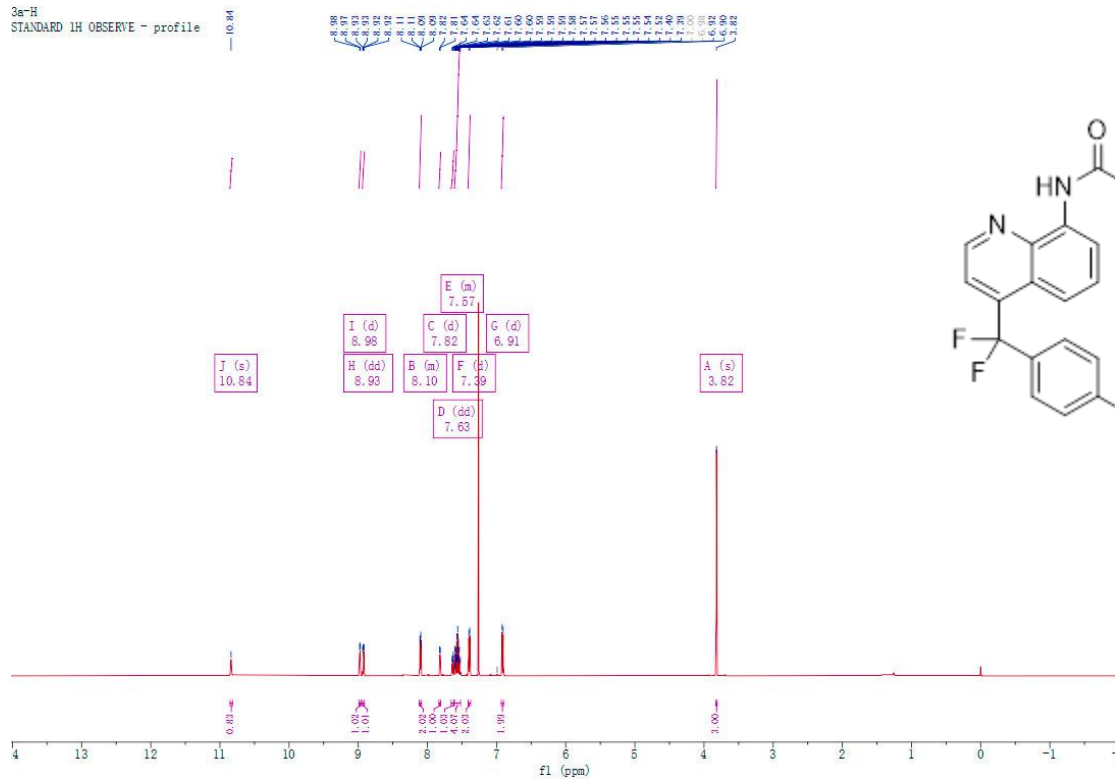

wangluyao-20210113.1.fid  
3a in CDCl3, 19F

84.40

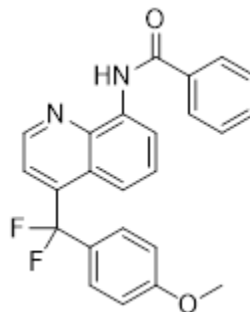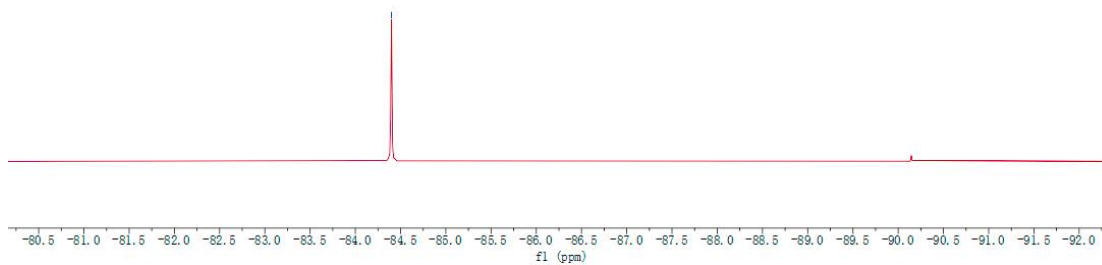

3a-C  
STANDARD 1H OBSERVE - profile

165.55  
161.23  
141.20  
139.18  
135.00  
131.96  
128.82  
127.57  
127.36  
127.11  
121.87  
120.27  
119.61  
119.24  
119.24  
118.67  
114.01  
112.65  
55.36

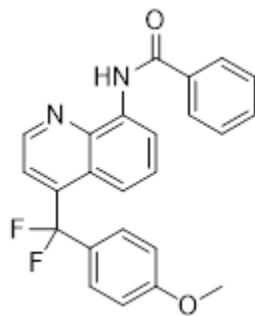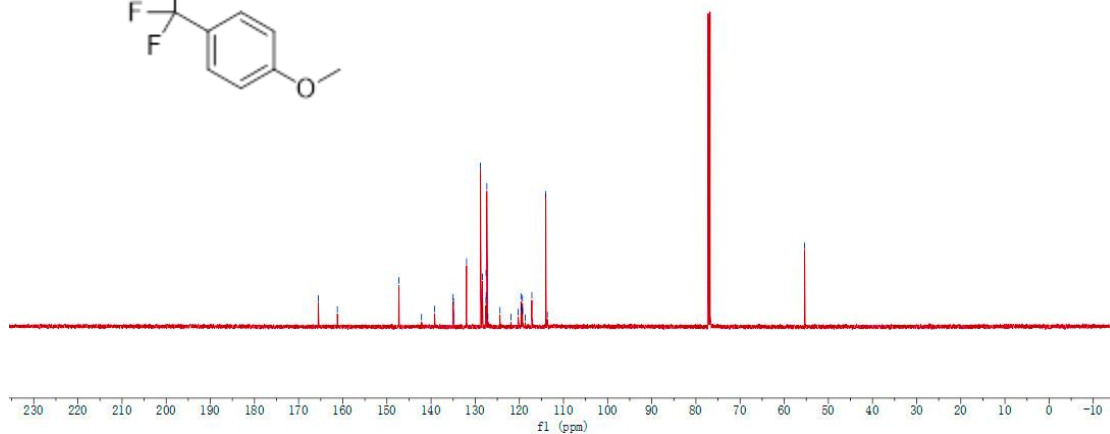

3i-H  
CNU VNMR5600

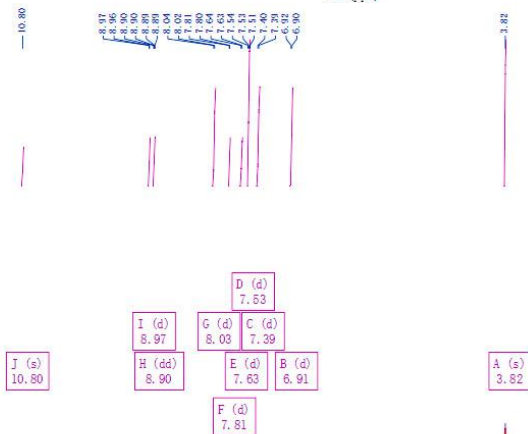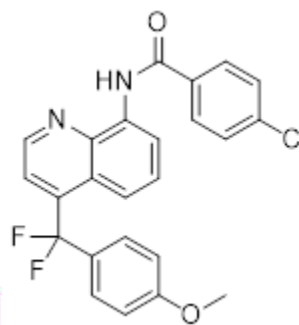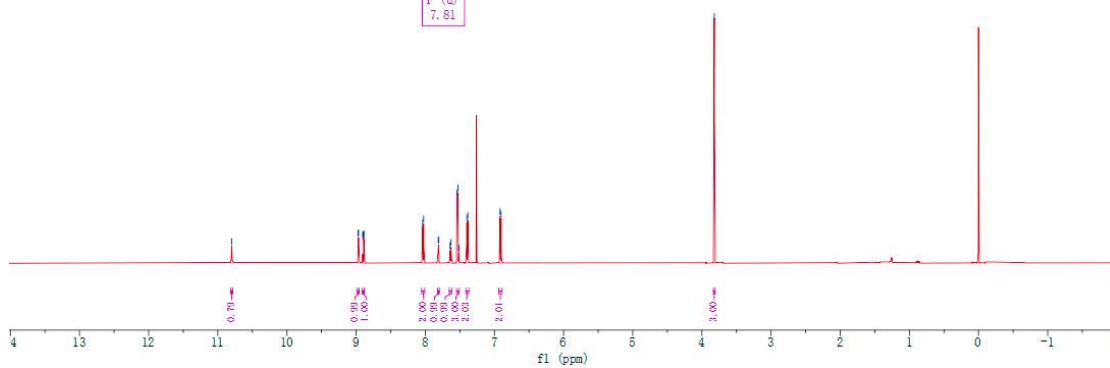

shiyanshiju. 5.fid  
3i in CDCl3, 19F

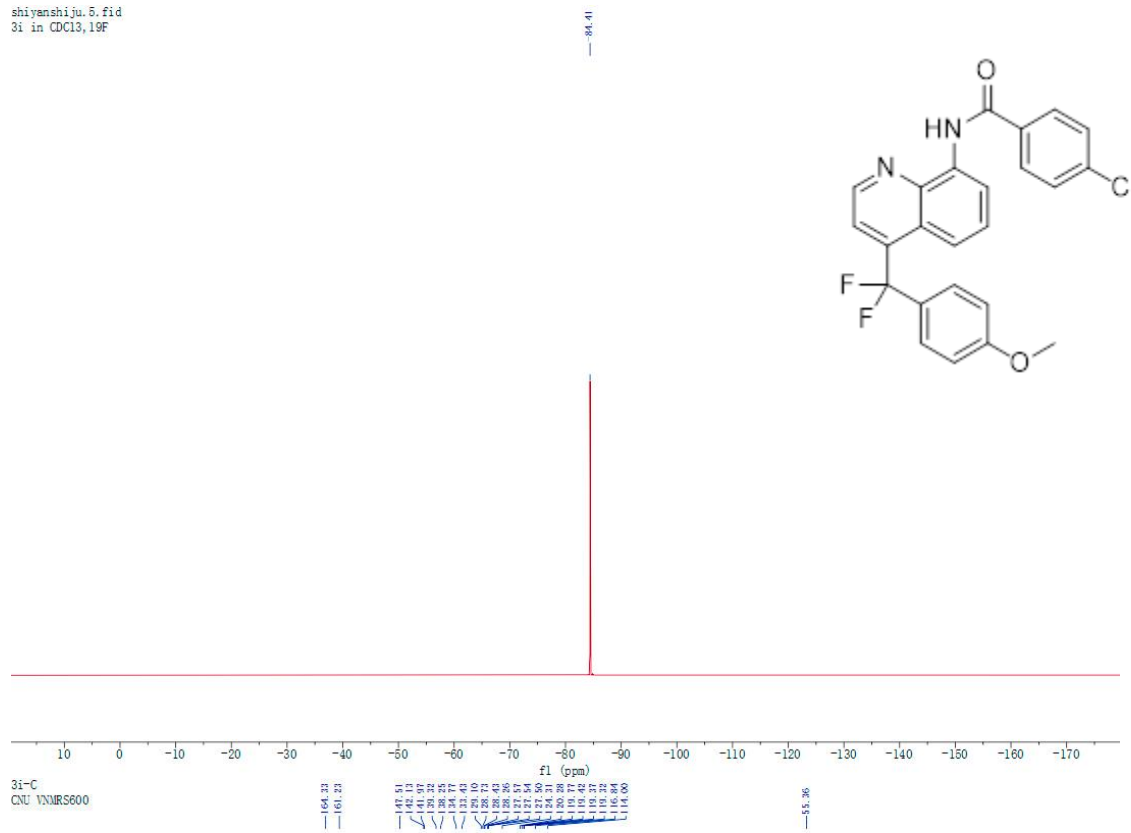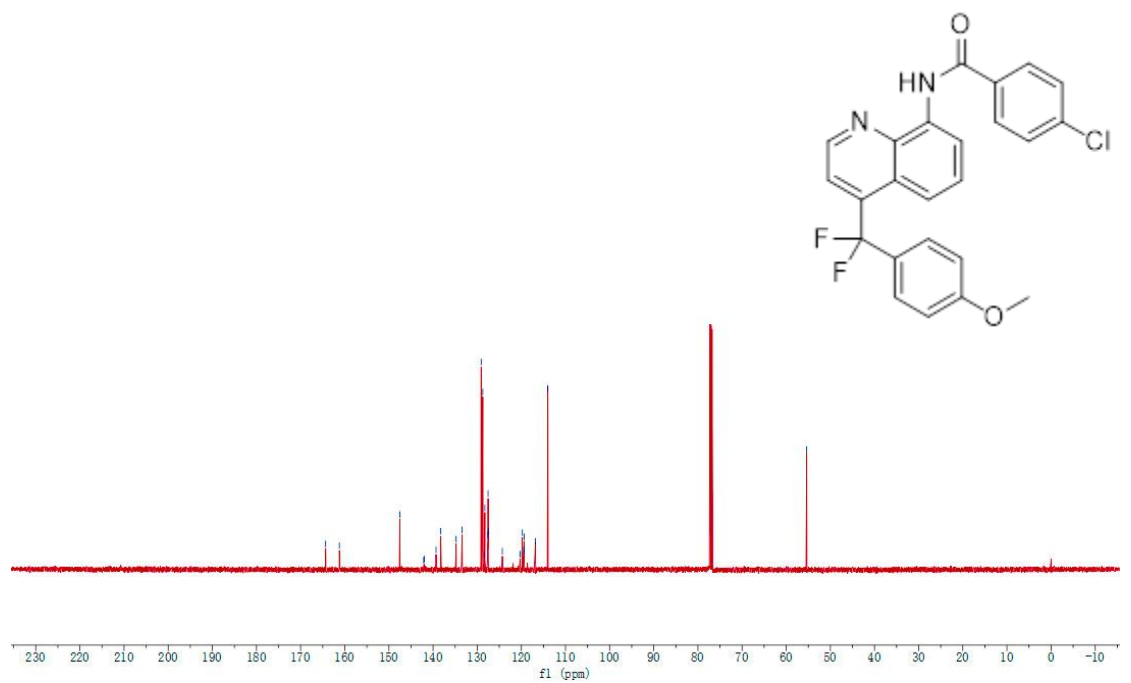

3m-H  
STANDARD 1H OBSERVE - profile

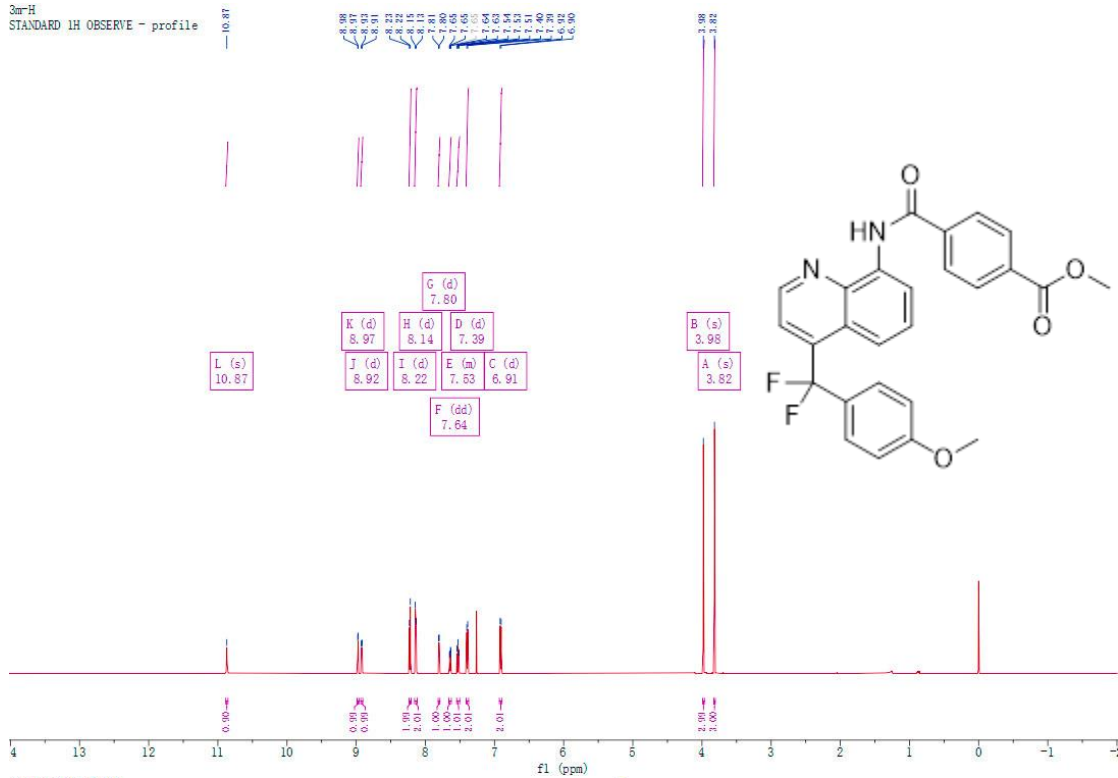

shiyanshiju.7.fid  
3m

-84.41

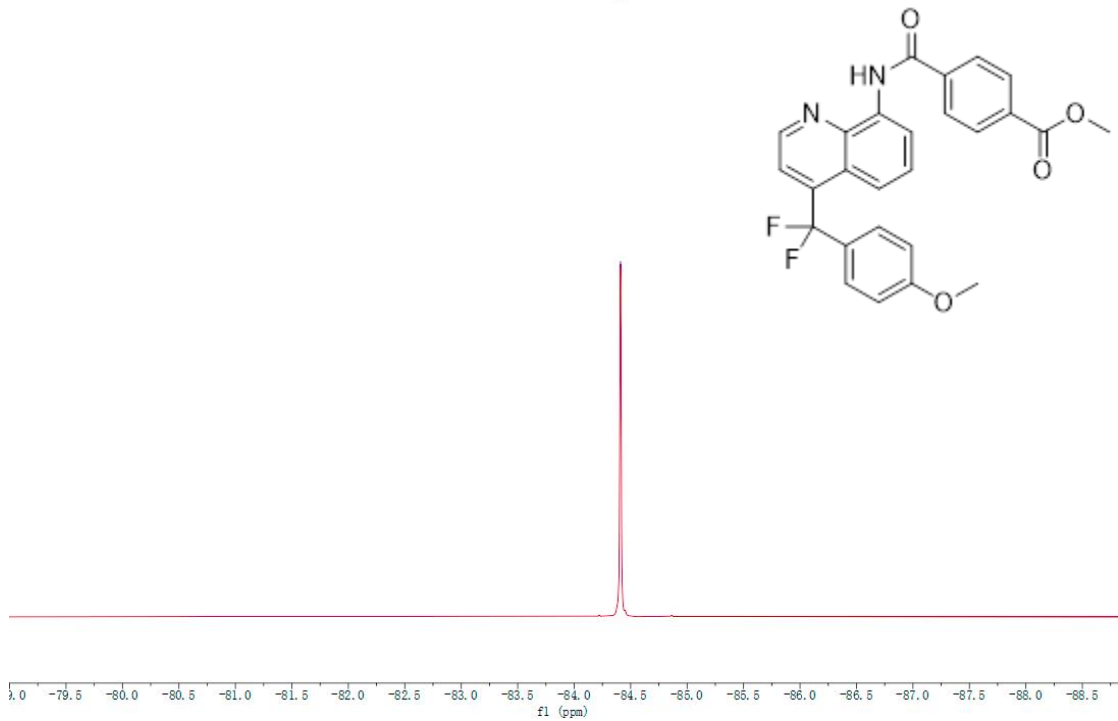

3m-C  
STANDARD 1H OBSERVE - profile

165.32  
163.44  
161.32  
141.63  
139.41  
138.87  
138.81  
133.07  
130.04  
129.21  
127.54  
127.50  
127.22  
126.29  
119.91  
118.41  
118.26  
118.00

55.26  
52.44

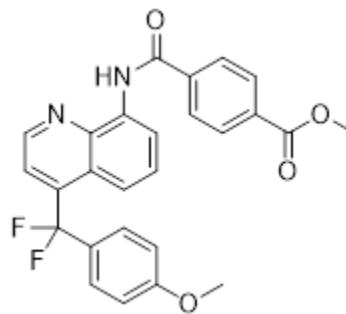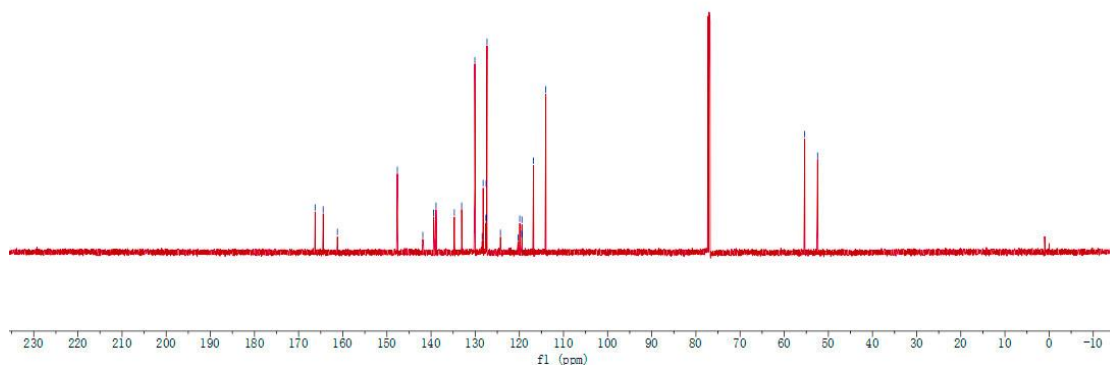

3m-H  
STANDARD 1H OBSERVE - profile

10.81  
8.98  
8.92  
8.91  
8.82  
8.63  
8.54  
8.40  
8.39  
8.38  
8.30  
3.82  
2.76  
1.30

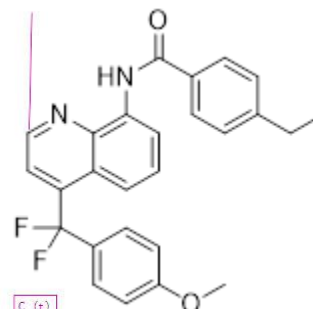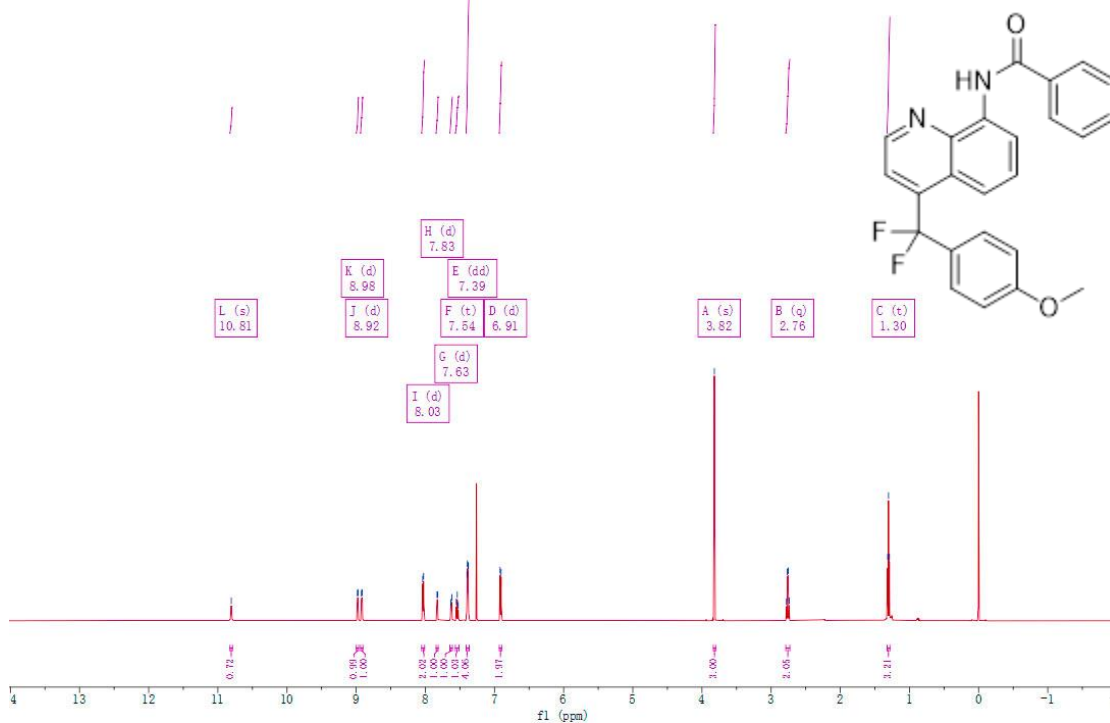



-81.40

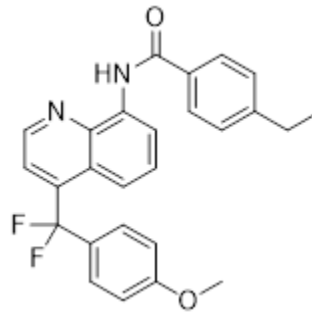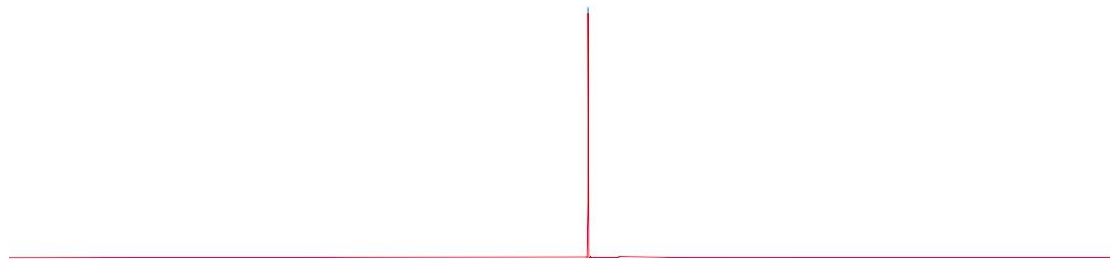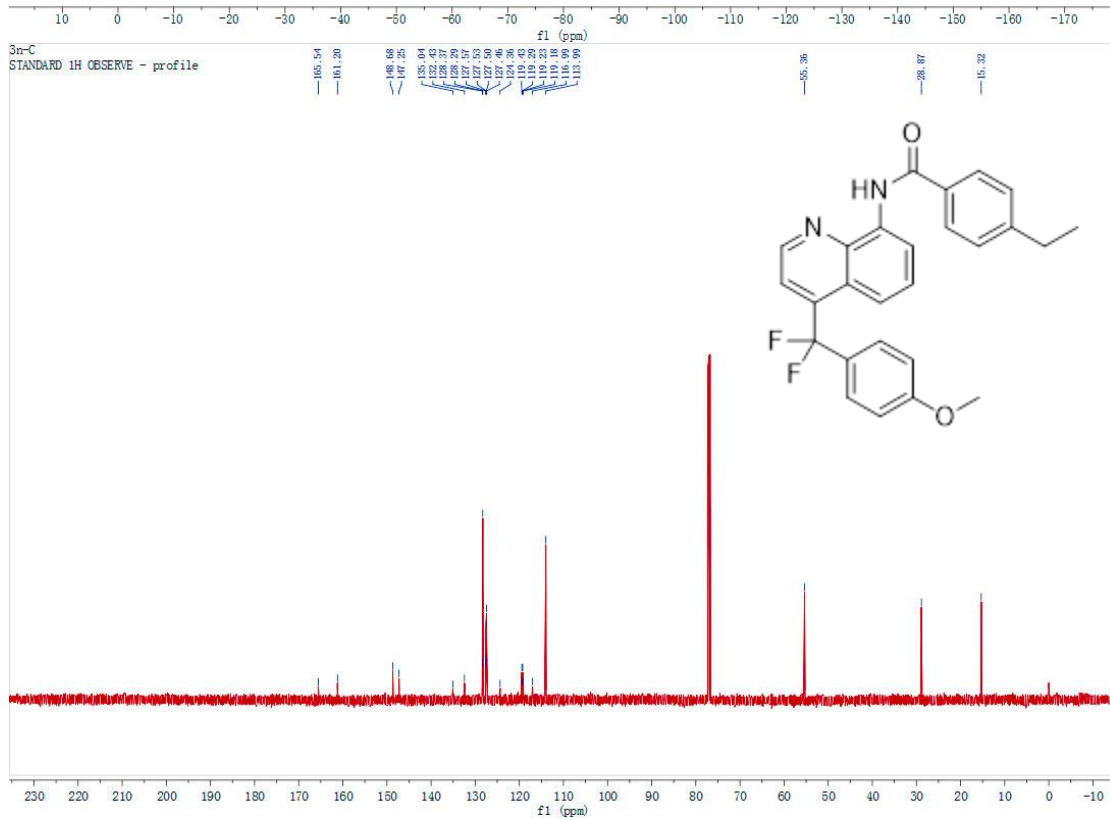

3b-H  
STANDARD 1H OBSERVE - profile

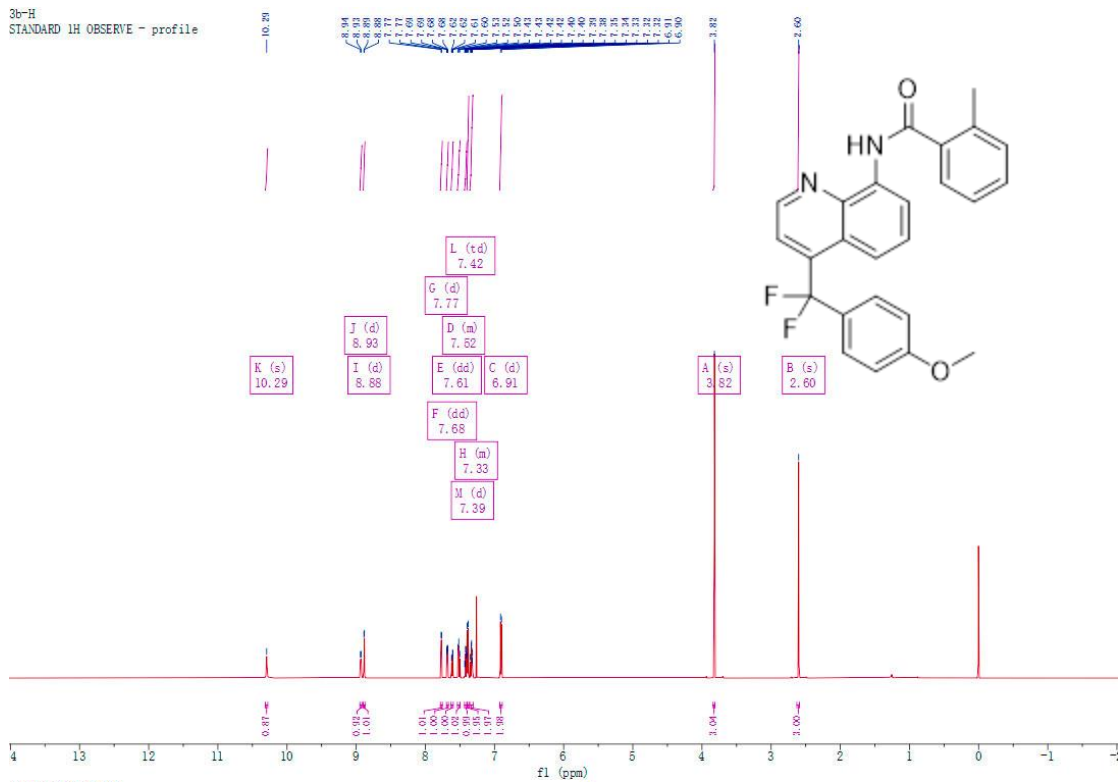

shiyanshiju.3.fid  
3e

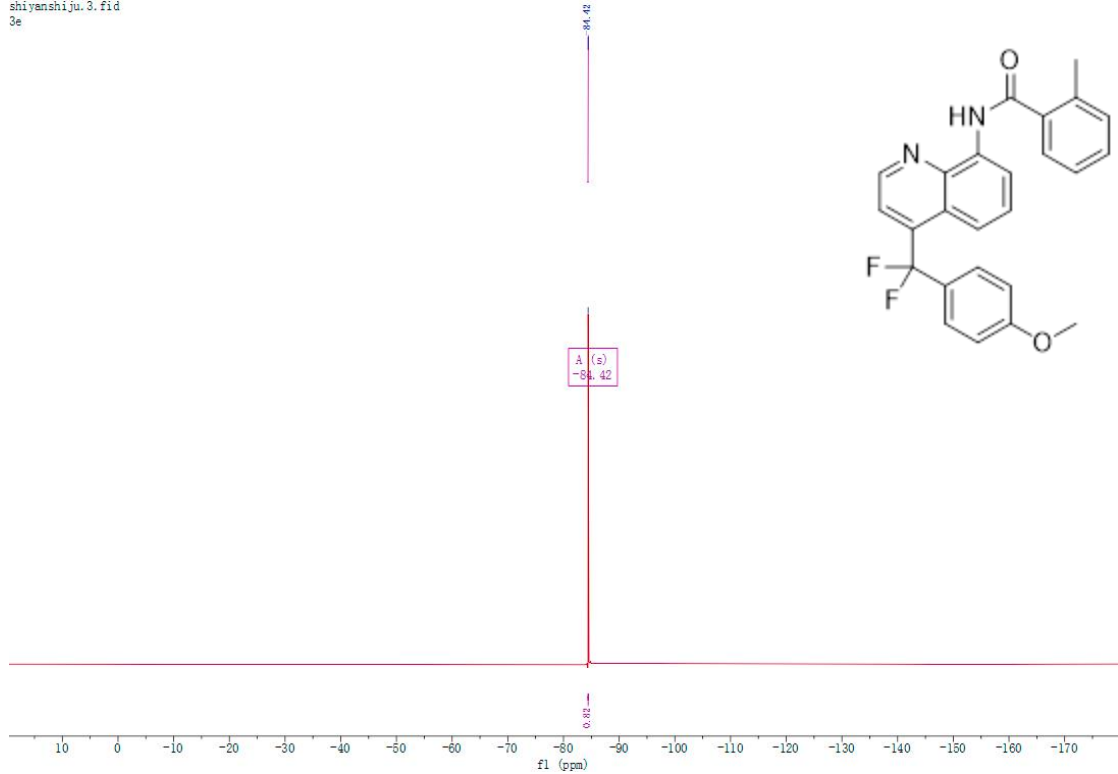

3b-C  
STANDARD 1H OBSERVE - profile

168.15  
161.20  
147.45  
141.57  
139.29  
136.56  
135.18  
130.40  
128.68  
128.21  
127.58  
127.24  
124.28  
120.29  
119.59  
119.21  
116.65  
113.98  
55.26  
20.19

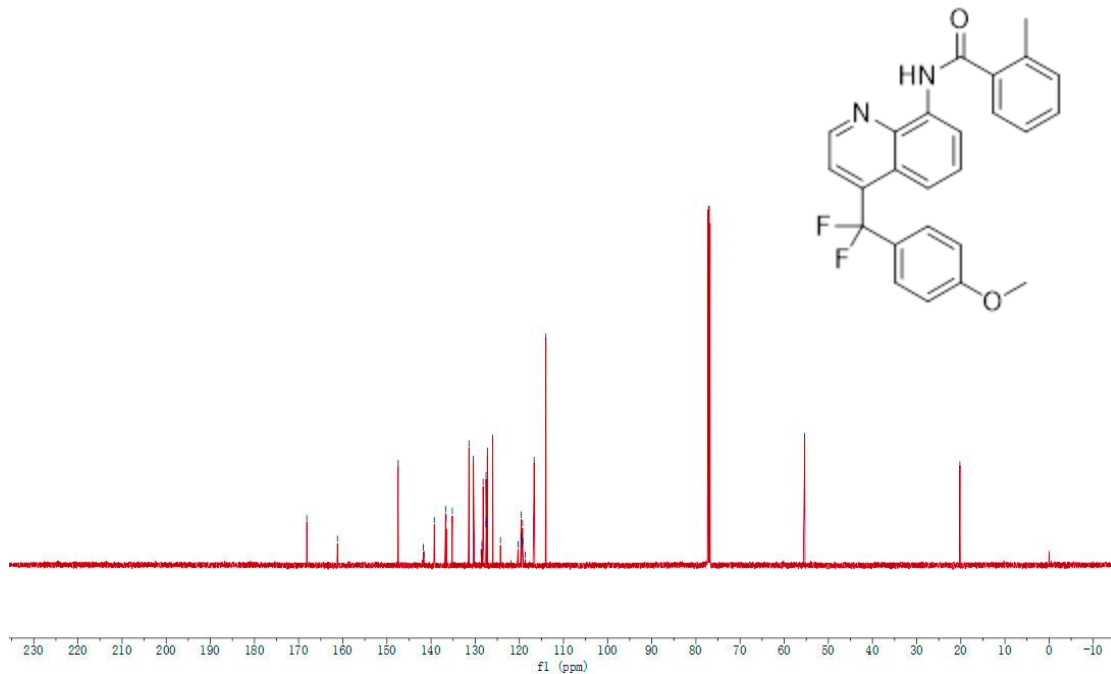

3b-H  
STANDARD 1H OBSERVE - profile

10.79  
8.98  
8.97  
8.93  
8.90  
8.88  
8.81  
8.80  
8.63  
8.54  
8.51  
8.46  
8.41  
8.39  
8.30  
8.20  
3.82  
2.49

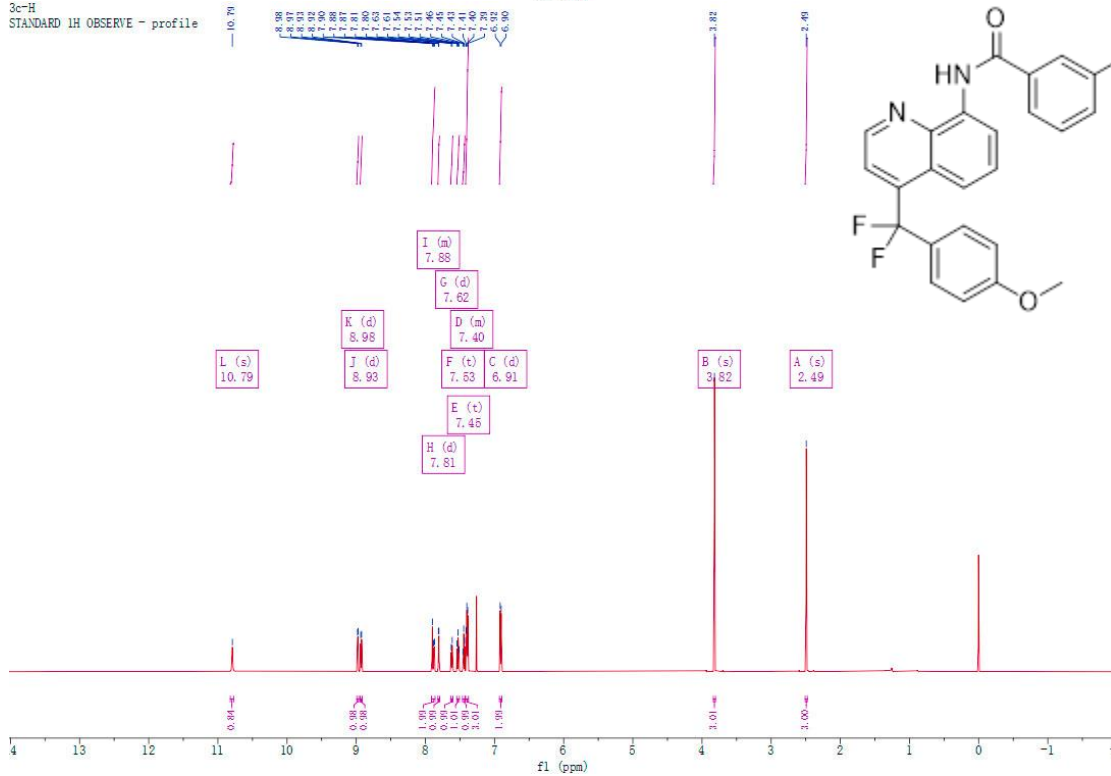

-81.29

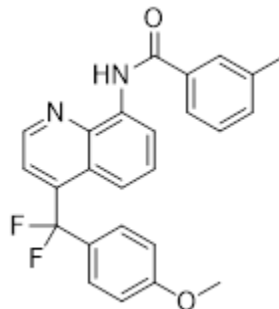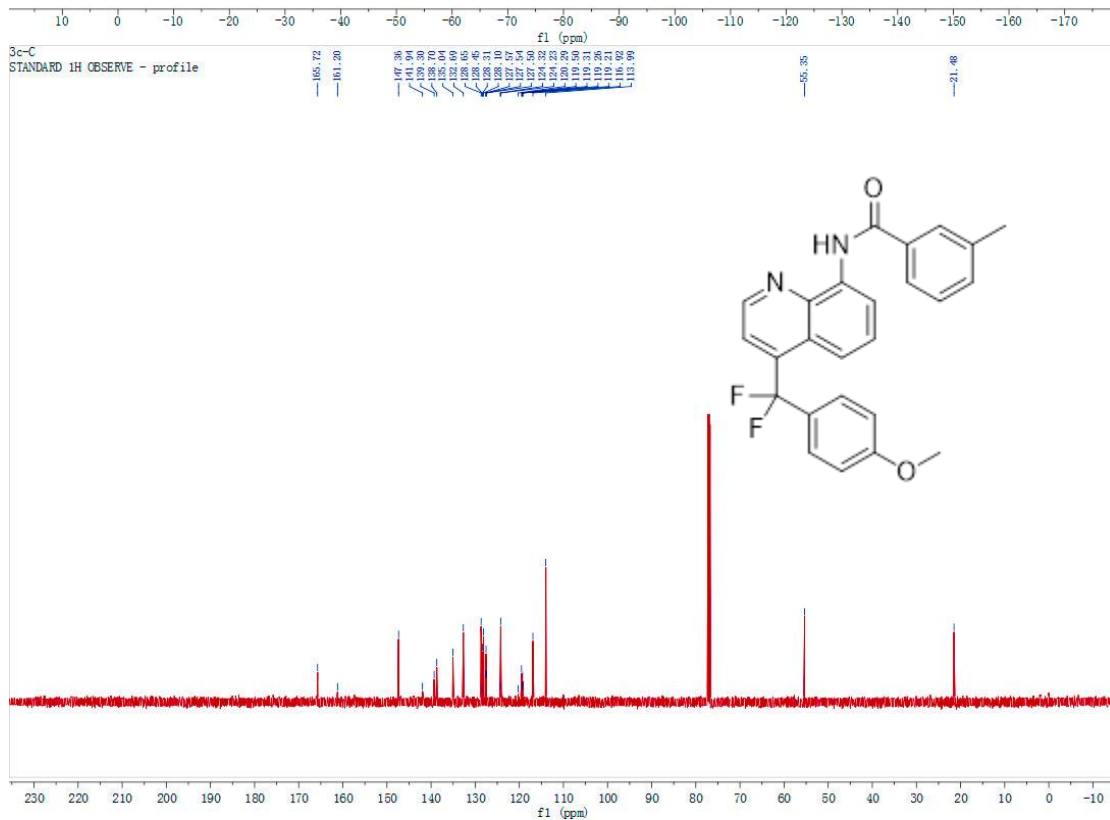

3d-H  
STANDARD 1H OBSERVE - profile

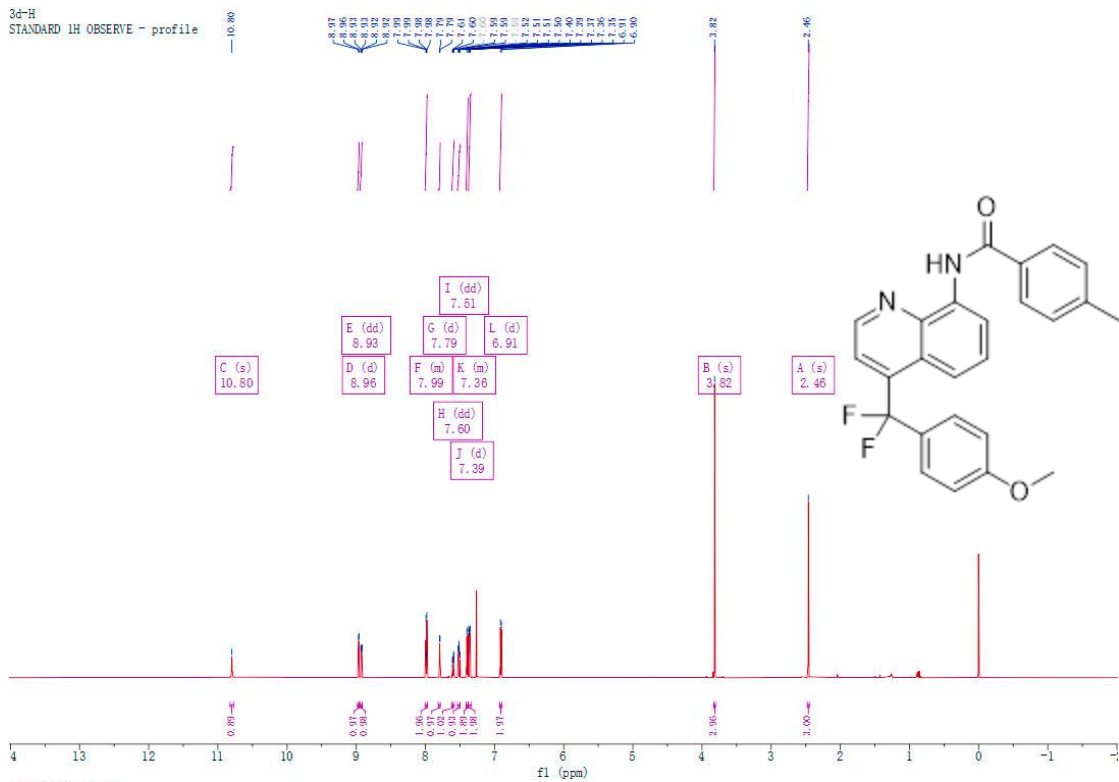

shiyanshiju.2.fid  
3d in CDCl<sub>3</sub>, 19F

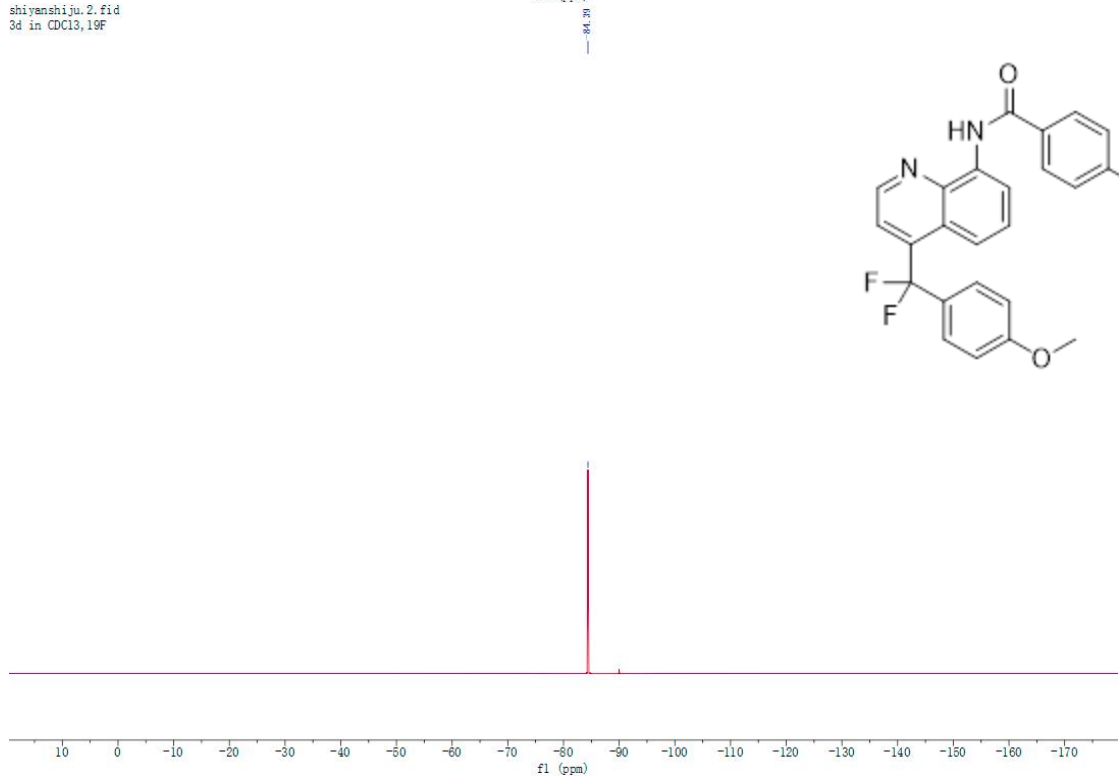

3d-C  
STANDARD 1H OBSERVE - profile

16.95  
165.45  
161.30  
147.41  
144.78  
139.43  
132.95  
129.49  
128.93  
127.58  
127.51  
127.21  
120.32  
119.37  
119.26  
119.21  
112.98

55.35

21.54

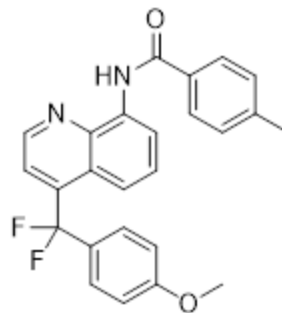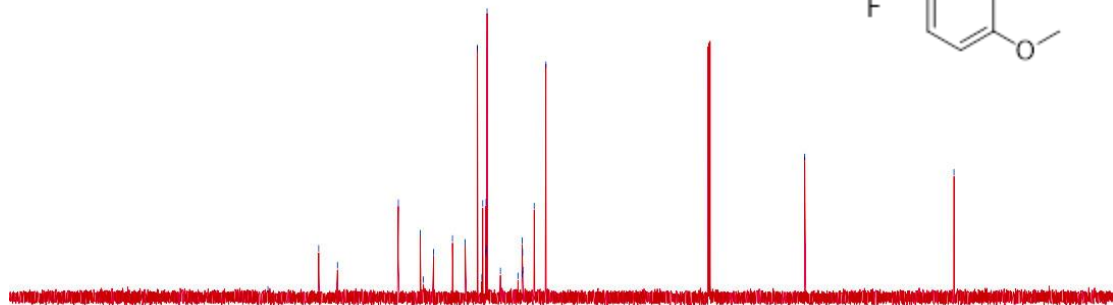

3d-H  
STANDARD 1H OBSERVE - profile

8.99  
8.97  
8.95  
8.93  
8.91  
8.89  
8.87  
8.85  
8.83  
8.81  
8.79  
8.77  
8.75  
8.73  
8.71  
8.69  
8.67  
8.65  
8.63  
8.61  
8.59  
8.57  
8.55  
8.53  
8.51  
8.49  
8.47  
8.45  
8.43  
8.41  
8.39  
8.37  
8.35  
8.33  
8.31  
8.29  
8.27  
8.25  
8.23  
8.21  
8.19  
8.17  
8.15  
8.13  
8.11  
8.09  
8.07  
8.05  
8.03  
8.01  
7.99  
7.97  
7.95  
7.93  
7.91  
7.89  
7.87  
7.85  
7.83  
7.81  
7.79  
7.77  
7.75  
7.73  
7.71  
7.69  
7.67  
7.65  
7.63  
7.61  
7.59  
7.57  
7.55  
7.53  
7.51  
7.49  
7.47  
7.45  
7.43  
7.41  
7.39  
7.37  
7.35  
7.33  
7.31  
7.29  
7.27  
7.25  
7.23  
7.21  
7.19  
7.17  
7.15  
7.13  
7.11  
7.09  
7.07  
7.05  
7.03  
7.01  
6.99  
6.97  
6.95  
6.93  
6.91  
6.89  
6.87  
6.85  
6.83  
6.81  
6.79  
6.77  
6.75  
6.73  
6.71  
6.69  
6.67  
6.65  
6.63  
6.61  
6.59  
6.57  
6.55  
6.53  
6.51  
6.49  
6.47  
6.45  
6.43  
6.41  
6.39  
6.37  
6.35  
6.33  
6.31  
6.29  
6.27  
6.25  
6.23  
6.21  
6.19  
6.17  
6.15  
6.13  
6.11  
6.09  
6.07  
6.05  
6.03  
6.01  
5.99  
5.97  
5.95  
5.93  
5.91  
5.89  
5.87  
5.85  
5.83  
5.81  
5.79  
5.77  
5.75  
5.73  
5.71  
5.69  
5.67  
5.65  
5.63  
5.61  
5.59  
5.57  
5.55  
5.53  
5.51  
5.49  
5.47  
5.45  
5.43  
5.41  
5.39  
5.37  
5.35  
5.33  
5.31  
5.29  
5.27  
5.25  
5.23  
5.21  
5.19  
5.17  
5.15  
5.13  
5.11  
5.09  
5.07  
5.05  
5.03  
5.01  
4.99  
4.97  
4.95  
4.93  
4.91  
4.89  
4.87  
4.85  
4.83  
4.81  
4.79  
4.77  
4.75  
4.73  
4.71  
4.69  
4.67  
4.65  
4.63  
4.61  
4.59  
4.57  
4.55  
4.53  
4.51  
4.49  
4.47  
4.45  
4.43  
4.41  
4.39  
4.37  
4.35  
4.33  
4.31  
4.29  
4.27  
4.25  
4.23  
4.21  
4.19  
4.17  
4.15  
4.13  
4.11  
4.09  
4.07  
4.05  
4.03  
4.01  
3.99  
3.97  
3.95  
3.93  
3.91  
3.89  
3.87  
3.85  
3.83  
3.81  
3.79  
3.77  
3.75  
3.73  
3.71  
3.69  
3.67  
3.65  
3.63  
3.61  
3.59  
3.57  
3.55  
3.53  
3.51  
3.49  
3.47  
3.45  
3.43  
3.41  
3.39  
3.37  
3.35  
3.33  
3.31  
3.29  
3.27  
3.25  
3.23  
3.21  
3.19  
3.17  
3.15  
3.13  
3.11  
3.09  
3.07  
3.05  
3.03  
3.01  
2.99  
2.97  
2.95  
2.93  
2.91  
2.89  
2.87  
2.85  
2.83  
2.81  
2.79  
2.77  
2.75  
2.73  
2.71  
2.69  
2.67  
2.65  
2.63  
2.61  
2.59  
2.57  
2.55  
2.53  
2.51  
2.49  
2.47  
2.45  
2.43  
2.41  
2.39  
2.37  
2.35  
2.33  
2.31  
2.29  
2.27  
2.25  
2.23  
2.21  
2.19  
2.17  
2.15  
2.13  
2.11  
2.09  
2.07  
2.05  
2.03  
2.01  
1.99  
1.97  
1.95  
1.93  
1.91  
1.89  
1.87  
1.85  
1.83  
1.81  
1.79  
1.77  
1.75  
1.73  
1.71  
1.69  
1.67  
1.65  
1.63  
1.61  
1.59  
1.57  
1.55  
1.53  
1.51  
1.49  
1.47  
1.45  
1.43  
1.41  
1.39  
1.37  
1.35  
1.33  
1.31  
1.29  
1.27  
1.25  
1.23  
1.21  
1.19  
1.17  
1.15  
1.13  
1.11  
1.09  
1.07  
1.05  
1.03  
1.01  
0.99  
0.97  
0.95  
0.93  
0.91  
0.89  
0.87  
0.85  
0.83  
0.81  
0.79  
0.77  
0.75  
0.73  
0.71  
0.69  
0.67  
0.65  
0.63  
0.61  
0.59  
0.57  
0.55  
0.53  
0.51  
0.49  
0.47  
0.45  
0.43  
0.41  
0.39  
0.37  
0.35  
0.33  
0.31  
0.29  
0.27  
0.25  
0.23  
0.21  
0.19  
0.17  
0.15  
0.13  
0.11  
0.09  
0.07  
0.05  
0.03  
0.01

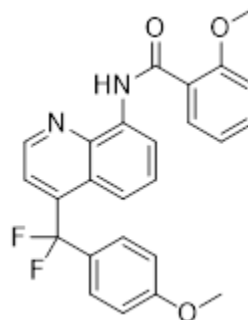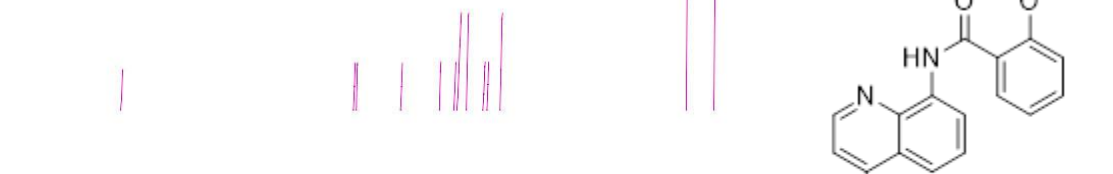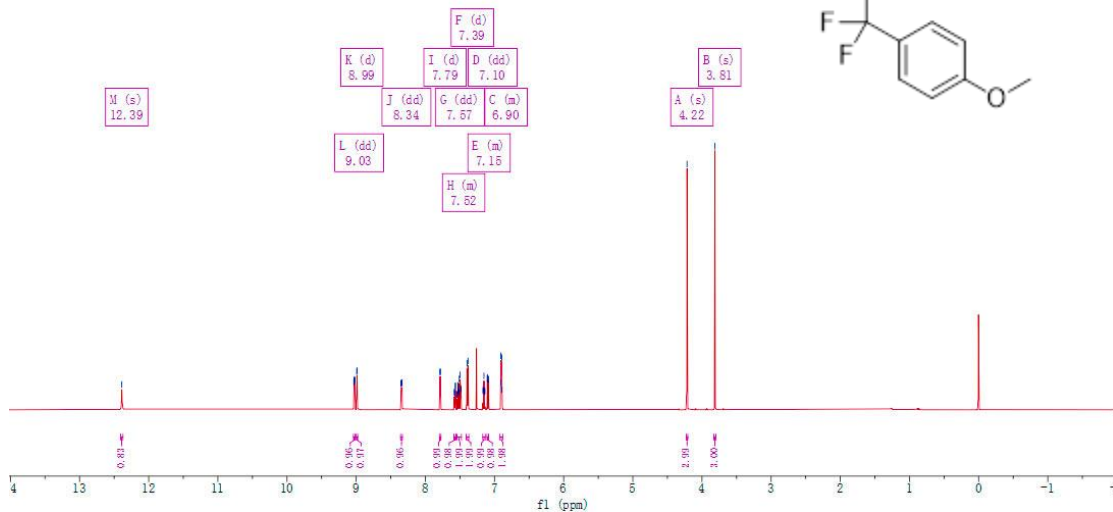

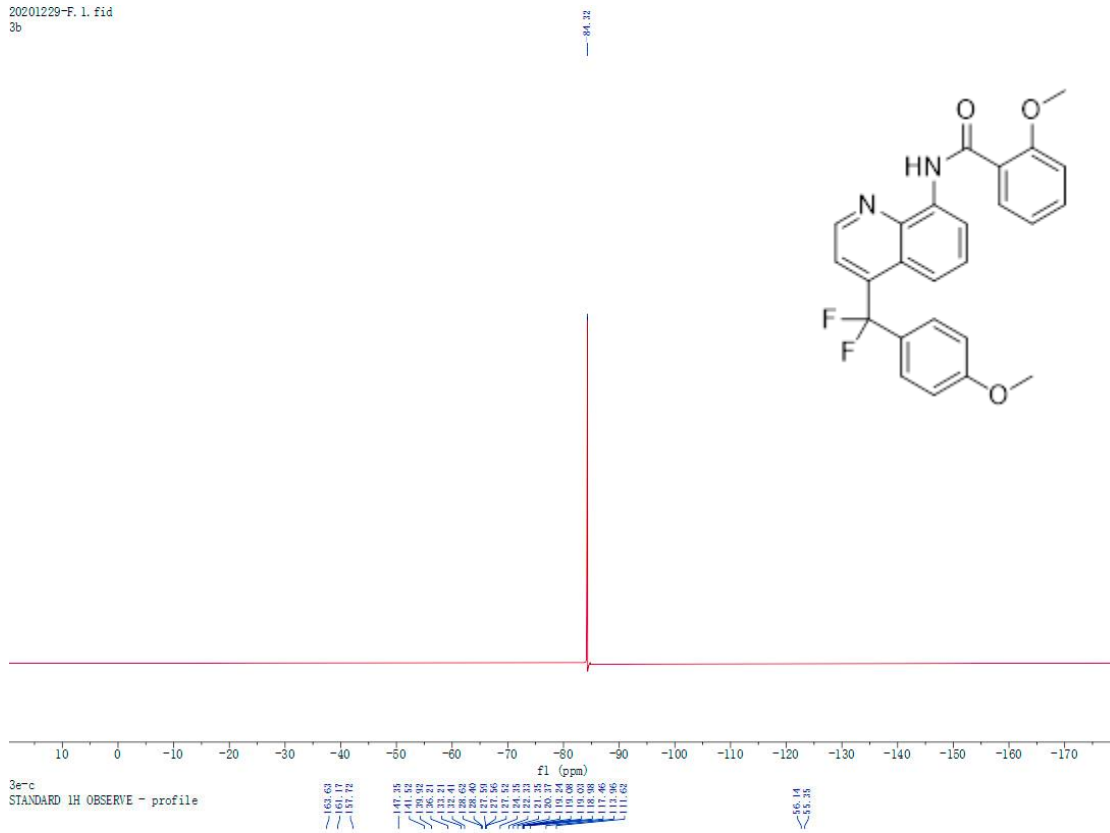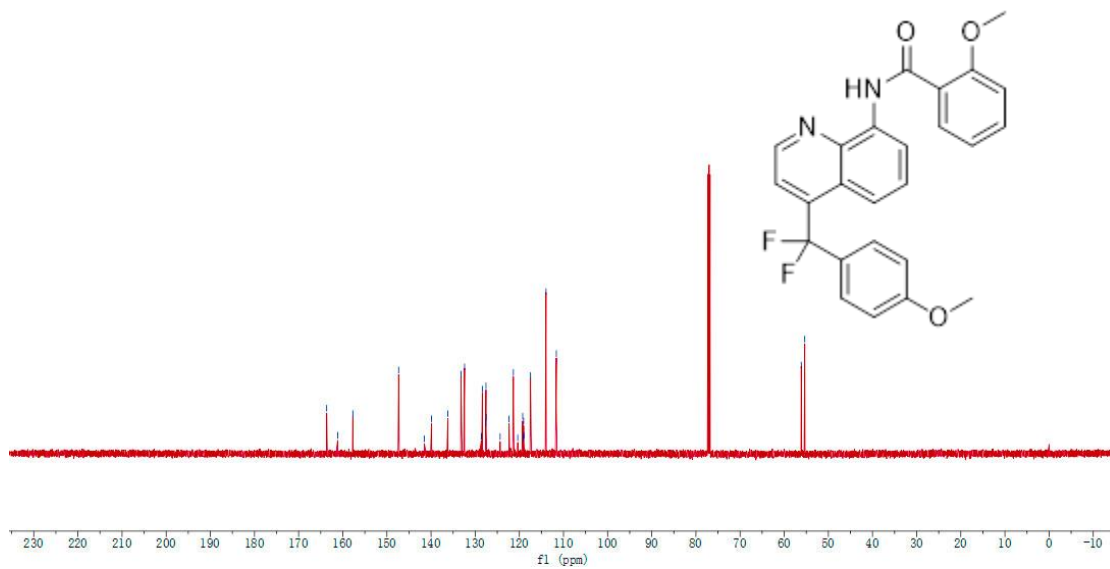

3F-H  
STANDARD 1H OBSERVE - profile

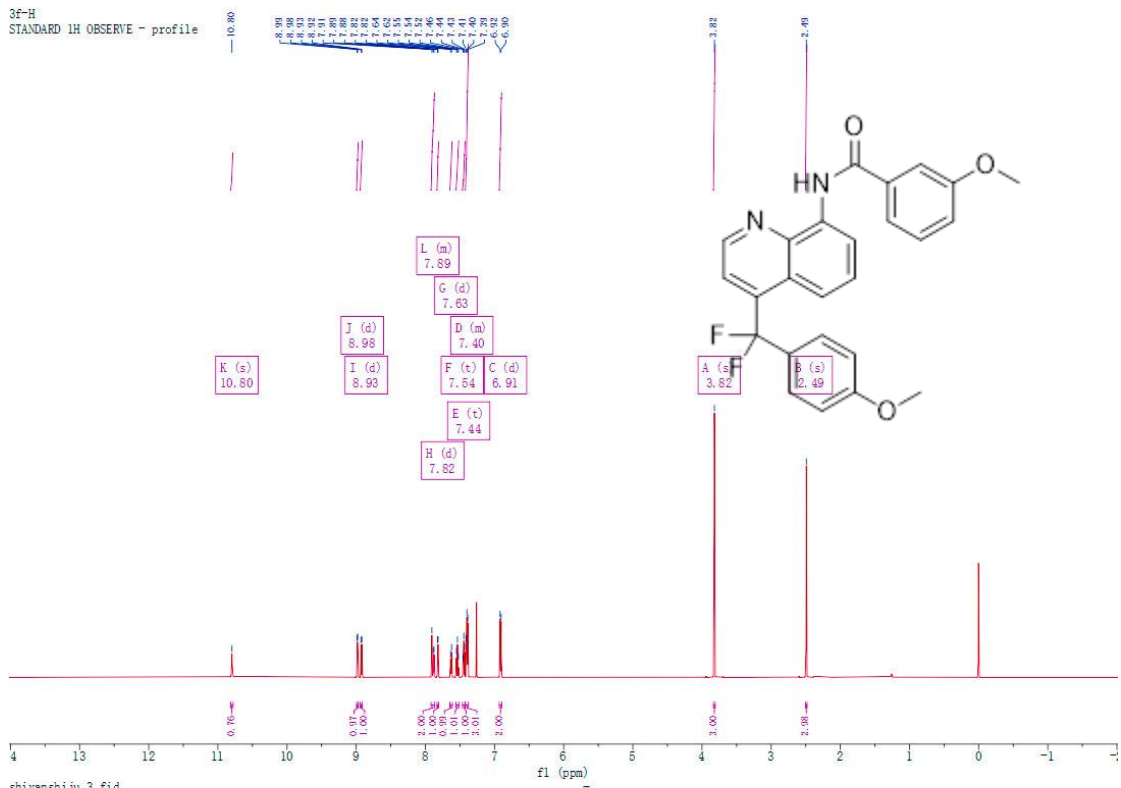

shiyanshiju.3.fid  
3f in CDCl3, 19F

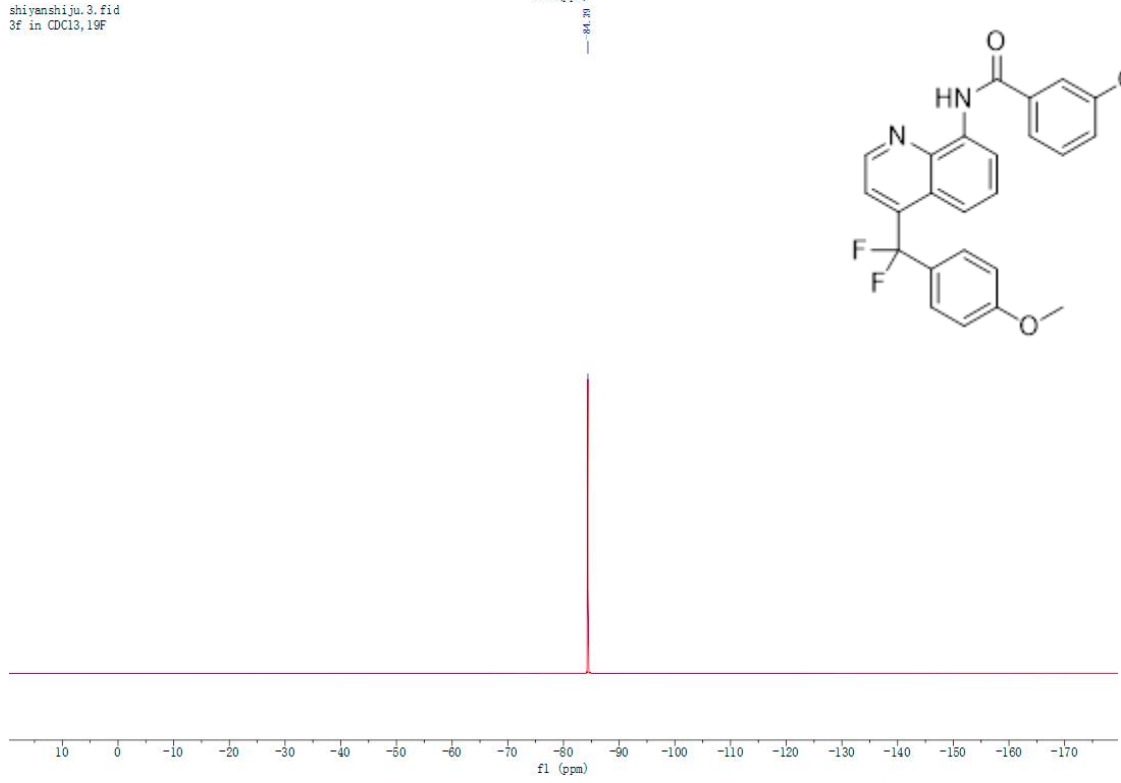



3F-C  
STANDARD 1H OBSERVE - profile

165.74  
161.22  
147.26  
139.89  
138.71  
137.89  
132.70  
128.66  
128.33  
128.11  
127.51  
127.35  
121.90  
120.29  
119.27  
118.70  
116.97  
114.00

55.26

31.88

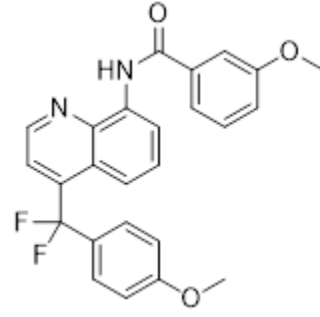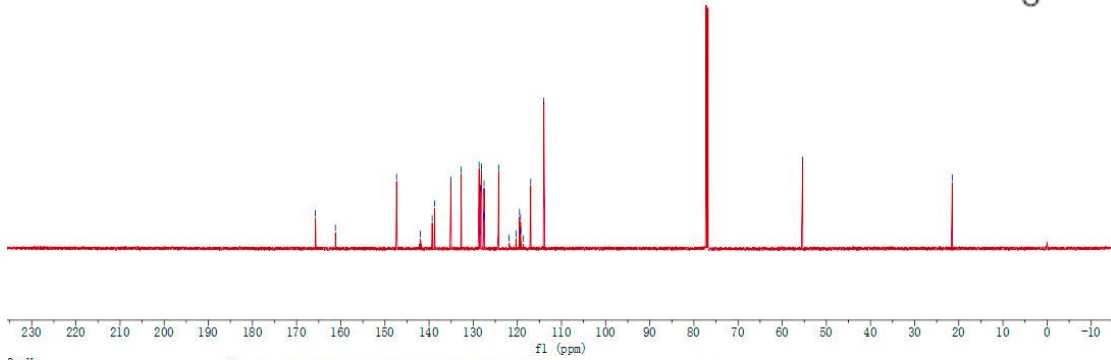

3g-H  
STANDARD 1H OBSERVE - profile

10.75  
8.96  
8.95  
8.91  
8.90  
8.88  
8.86  
8.85  
8.84  
8.83  
8.82  
8.81  
8.80  
8.79  
8.78  
8.77  
8.76  
8.75  
8.74  
8.73  
8.72  
8.71  
8.70  
8.69  
8.68  
8.67  
8.66  
8.65  
8.64  
8.63  
8.62  
8.61  
8.60  
8.59  
8.58  
8.57  
8.56  
8.55  
8.54  
8.53  
8.52  
8.51  
8.50  
8.49  
8.48  
8.47  
8.46  
8.45  
8.44  
8.43  
8.42  
8.41  
8.40  
8.39  
8.38  
8.37  
8.36  
8.35  
8.34  
8.33  
8.32  
8.31  
8.30  
8.29  
8.28  
8.27  
8.26  
8.25  
8.24  
8.23  
8.22  
8.21  
8.20  
8.19  
8.18  
8.17  
8.16  
8.15  
8.14  
8.13  
8.12  
8.11  
8.10  
8.09  
8.08  
8.07  
8.06  
8.05  
8.04  
8.03  
8.02  
8.01  
8.00  
7.99  
7.98  
7.97  
7.96  
7.95  
7.94  
7.93  
7.92  
7.91  
7.90  
7.89  
7.88  
7.87  
7.86  
7.85  
7.84  
7.83  
7.82  
7.81  
7.80  
7.79  
7.78  
7.77  
7.76  
7.75  
7.74  
7.73  
7.72  
7.71  
7.70  
7.69  
7.68  
7.67  
7.66  
7.65  
7.64  
7.63  
7.62  
7.61  
7.60  
7.59  
7.58  
7.57  
7.56  
7.55  
7.54  
7.53  
7.52  
7.51  
7.50  
7.49  
7.48  
7.47  
7.46  
7.45  
7.44  
7.43  
7.42  
7.41  
7.40  
7.39  
7.38  
7.37  
7.36  
7.35  
7.34  
7.33  
7.32  
7.31  
7.30  
7.29  
7.28  
7.27  
7.26  
7.25  
7.24  
7.23  
7.22  
7.21  
7.20  
7.19  
7.18  
7.17  
7.16  
7.15  
7.14  
7.13  
7.12  
7.11  
7.10  
7.09  
7.08  
7.07  
7.06  
7.05  
7.04  
7.03  
7.02  
7.01  
7.00  
6.99  
6.98  
6.97  
6.96  
6.95  
6.94  
6.93  
6.92  
6.91  
6.90  
6.89  
6.88  
6.87  
6.86  
6.85  
6.84  
6.83  
6.82  
6.81  
6.80  
6.79  
6.78  
6.77  
6.76  
6.75  
6.74  
6.73  
6.72  
6.71  
6.70  
6.69  
6.68  
6.67  
6.66  
6.65  
6.64  
6.63  
6.62  
6.61  
6.60  
6.59  
6.58  
6.57  
6.56  
6.55  
6.54  
6.53  
6.52  
6.51  
6.50  
6.49  
6.48  
6.47  
6.46  
6.45  
6.44  
6.43  
6.42  
6.41  
6.40  
6.39  
6.38  
6.37  
6.36  
6.35  
6.34  
6.33  
6.32  
6.31  
6.30  
6.29  
6.28  
6.27  
6.26  
6.25  
6.24  
6.23  
6.22  
6.21  
6.20  
6.19  
6.18  
6.17  
6.16  
6.15  
6.14  
6.13  
6.12  
6.11  
6.10  
6.09  
6.08  
6.07  
6.06  
6.05  
6.04  
6.03  
6.02  
6.01  
6.00  
5.99  
5.98  
5.97  
5.96  
5.95  
5.94  
5.93  
5.92  
5.91  
5.90  
5.89  
5.88  
5.87  
5.86  
5.85  
5.84  
5.83  
5.82  
5.81  
5.80  
5.79  
5.78  
5.77  
5.76  
5.75  
5.74  
5.73  
5.72  
5.71  
5.70  
5.69  
5.68  
5.67  
5.66  
5.65  
5.64  
5.63  
5.62  
5.61  
5.60  
5.59  
5.58  
5.57  
5.56  
5.55  
5.54  
5.53  
5.52  
5.51  
5.50  
5.49  
5.48  
5.47  
5.46  
5.45  
5.44  
5.43  
5.42  
5.41  
5.40  
5.39  
5.38  
5.37  
5.36  
5.35  
5.34  
5.33  
5.32  
5.31  
5.30  
5.29  
5.28  
5.27  
5.26  
5.25  
5.24  
5.23  
5.22  
5.21  
5.20  
5.19  
5.18  
5.17  
5.16  
5.15  
5.14  
5.13  
5.12  
5.11  
5.10  
5.09  
5.08  
5.07  
5.06  
5.05  
5.04  
5.03  
5.02  
5.01  
5.00  
4.99  
4.98  
4.97  
4.96  
4.95  
4.94  
4.93  
4.92  
4.91  
4.90  
4.89  
4.88  
4.87  
4.86  
4.85  
4.84  
4.83  
4.82  
4.81  
4.80  
4.79  
4.78  
4.77  
4.76  
4.75  
4.74  
4.73  
4.72  
4.71  
4.70  
4.69  
4.68  
4.67  
4.66  
4.65  
4.64  
4.63  
4.62  
4.61  
4.60  
4.59  
4.58  
4.57  
4.56  
4.55  
4.54  
4.53  
4.52  
4.51  
4.50  
4.49  
4.48  
4.47  
4.46  
4.45  
4.44  
4.43  
4.42  
4.41  
4.40  
4.39  
4.38  
4.37  
4.36  
4.35  
4.34  
4.33  
4.32  
4.31  
4.30  
4.29  
4.28  
4.27  
4.26  
4.25  
4.24  
4.23  
4.22  
4.21  
4.20  
4.19  
4.18  
4.17  
4.16  
4.15  
4.14  
4.13  
4.12  
4.11  
4.10  
4.09  
4.08  
4.07  
4.06  
4.05  
4.04  
4.03  
4.02  
4.01  
4.00  
3.99  
3.98  
3.97  
3.96  
3.95  
3.94  
3.93  
3.92  
3.91  
3.90  
3.89  
3.88  
3.87  
3.86  
3.85  
3.84  
3.83  
3.82  
3.81  
3.80  
3.79  
3.78  
3.77  
3.76  
3.75  
3.74  
3.73  
3.72  
3.71  
3.70  
3.69  
3.68  
3.67  
3.66  
3.65  
3.64  
3.63  
3.62  
3.61  
3.60  
3.59  
3.58  
3.57  
3.56  
3.55  
3.54  
3.53  
3.52  
3.51  
3.50  
3.49  
3.48  
3.47  
3.46  
3.45  
3.44  
3.43  
3.42  
3.41  
3.40  
3.39  
3.38  
3.37  
3.36  
3.35  
3.34  
3.33  
3.32  
3.31  
3.30  
3.29  
3.28  
3.27  
3.26  
3.25  
3.24  
3.23  
3.22  
3.21  
3.20  
3.19  
3.18  
3.17  
3.16  
3.15  
3.14  
3.13  
3.12  
3.11  
3.10  
3.09  
3.08  
3.07  
3.06  
3.05  
3.04  
3.03  
3.02  
3.01  
3.00  
2.99  
2.98  
2.97  
2.96  
2.95  
2.94  
2.93  
2.92  
2.91  
2.90  
2.89  
2.88  
2.87  
2.86  
2.85  
2.84  
2.83  
2.82  
2.81  
2.80  
2.79  
2.78  
2.77  
2.76  
2.75  
2.74  
2.73  
2.72  
2.71  
2.70  
2.69  
2.68  
2.67  
2.66  
2.65  
2.64  
2.63  
2.62  
2.61  
2.60  
2.59  
2.58  
2.57  
2.56  
2.55  
2.54  
2.53  
2.52  
2.51  
2.50  
2.49  
2.48  
2.47  
2.46  
2.45  
2.44  
2.43  
2.42  
2.41  
2.40  
2.39  
2.38  
2.37  
2.36  
2.35  
2.34  
2.33  
2.32  
2.31  
2.30  
2.29  
2.28  
2.27  
2.26  
2.25  
2.24  
2.23  
2.22  
2.21  
2.20  
2.19  
2.18  
2.17  
2.16  
2.15  
2.14  
2.13  
2.12  
2.11  
2.10  
2.09  
2.08  
2.07  
2.06  
2.05  
2.04  
2.03  
2.02  
2.01  
2.00  
1.99  
1.98  
1.97  
1.96  
1.95  
1.94  
1.93  
1.92  
1.91  
1.90  
1.89  
1.88  
1.87  
1.86  
1.85  
1.84  
1.83  
1.82  
1.81  
1.80  
1.79  
1.78  
1.77  
1.76  
1.75  
1.74  
1.73  
1.72  
1.71  
1.70  
1.69  
1.68  
1.67  
1.66  
1.65  
1.64  
1.63  
1.62  
1.61  
1.60  
1.59  
1.58  
1.57  
1.56  
1.55  
1.54  
1.53  
1.52  
1.51  
1.50  
1.49  
1.48  
1.47  
1.46  
1.45  
1.44  
1.43  
1.42  
1.41  
1.40  
1.39  
1.38  
1.37  
1.36  
1.35  
1.34  
1.33  
1.32  
1.31  
1.30  
1.29  
1.28  
1.27  
1.26  
1.25  
1.24  
1.23  
1.22  
1.21  
1.20  
1.19  
1.18  
1.17  
1.16  
1.15  
1.14  
1.13  
1.12  
1.11  
1.10  
1.09  
1.08  
1.07  
1.06  
1.05  
1.04  
1.03  
1.02  
1.01  
1.00  
0.99  
0.98  
0.97  
0.96  
0.95  
0.94  
0.93  
0.92  
0.91  
0.90  
0.89  
0.88  
0.87  
0.86  
0.85  
0.84  
0.83  
0.82  
0.81  
0.80  
0.79  
0.78  
0.77  
0.76  
0.75  
0.74  
0.73  
0.72  
0.71  
0.70  
0.69  
0.68  
0.67  
0.66  
0.65  
0.64  
0.63  
0.62  
0.61  
0.60  
0.59  
0.58  
0.57  
0.56  
0.55  
0.54  
0.53  
0.52  
0.51  
0.50  
0.49  
0.48  
0.47  
0.46  
0.45  
0.44  
0.43  
0.42  
0.41  
0.40  
0.39  
0.38  
0.37  
0.36  
0.35  
0.34  
0.33  
0.32  
0.31  
0.30  
0.29  
0.28  
0.27  
0.26  
0.25  
0.24  
0.23  
0.22  
0.21  
0.20  
0.19  
0.18  
0.17  
0.16  
0.15  
0.14  
0.13  
0.12  
0.11  
0.10  
0.09  
0.08  
0.07  
0.06  
0.05  
0.04  
0.03  
0.02  
0.01  
0.00

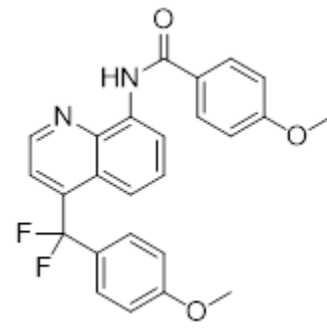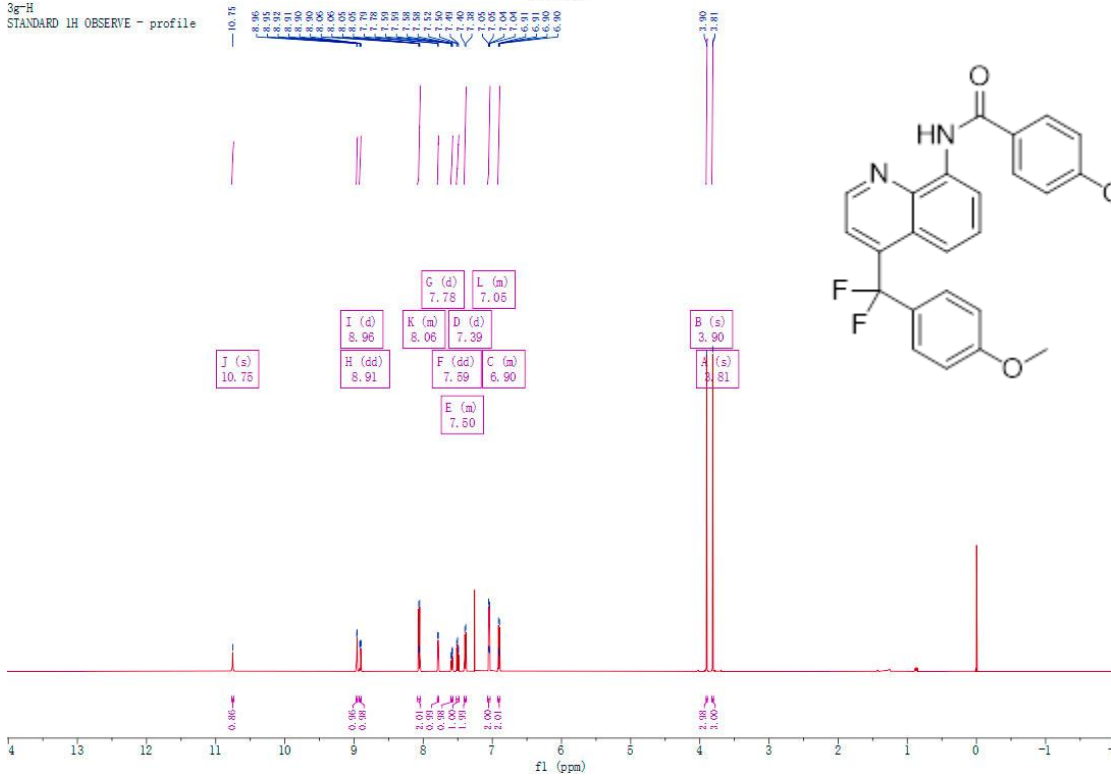

shiyanshiju.4.fid  
3g

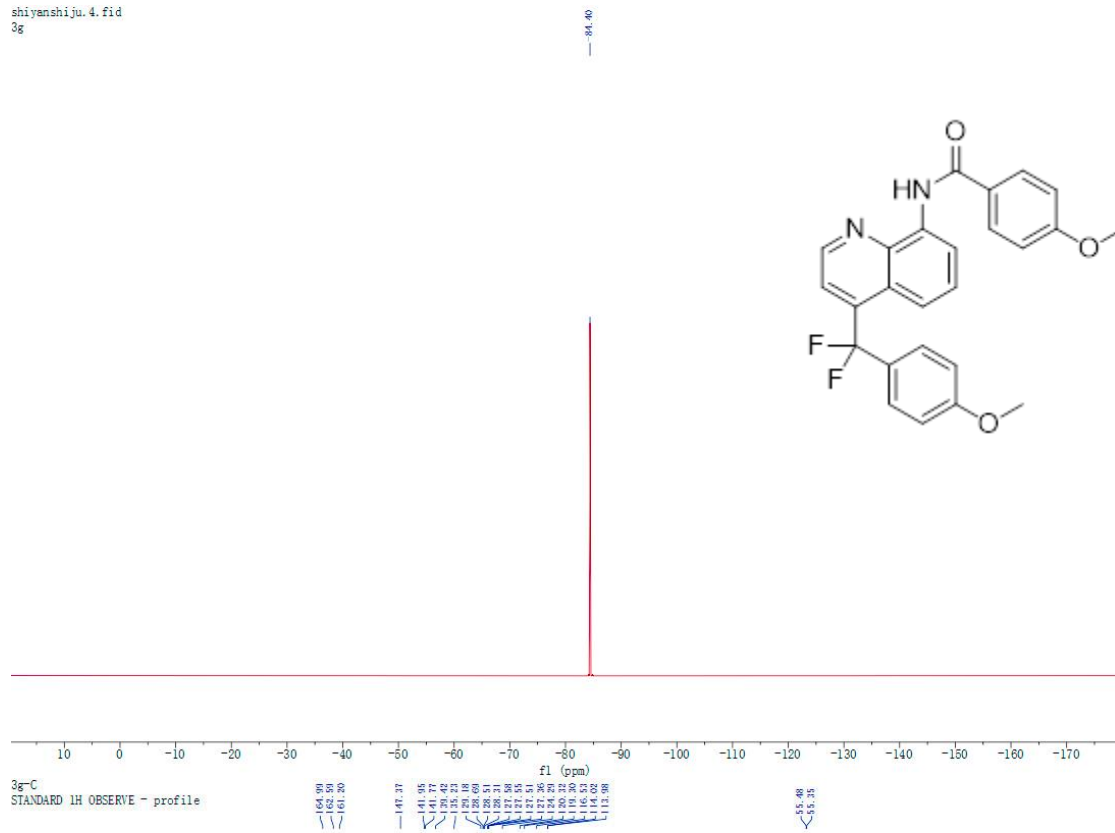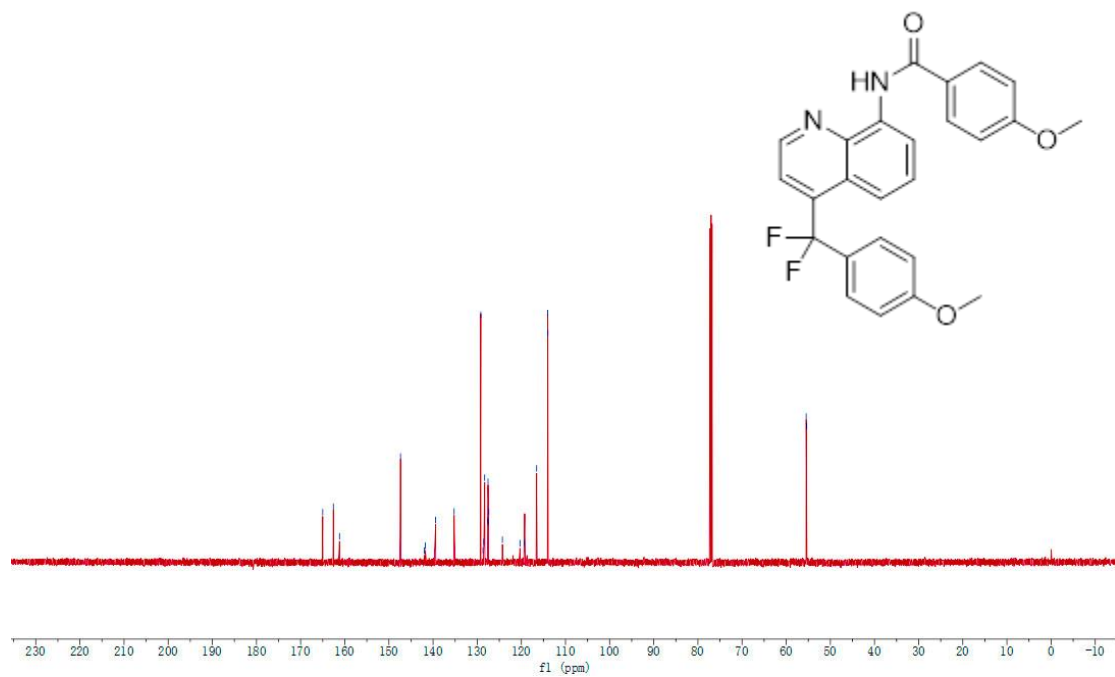

3k-H  
STANDARD 1H OBSERVE - profile

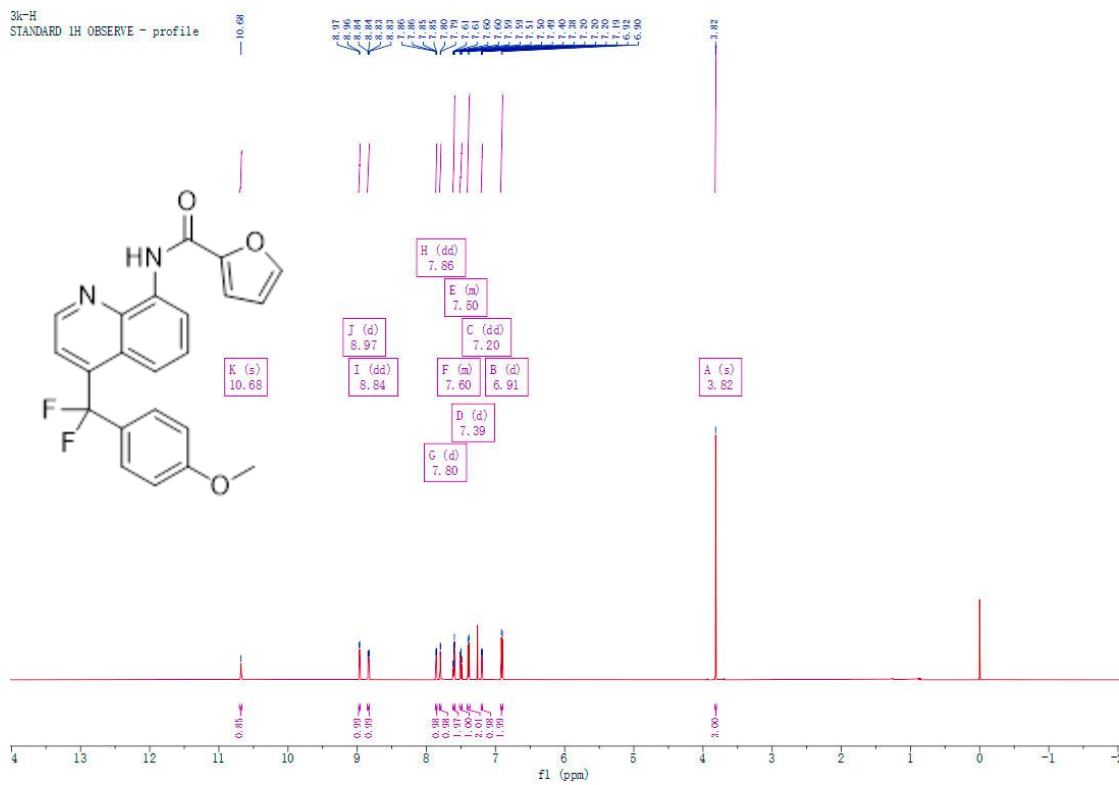

shiyanshiju.5.fid  
3k

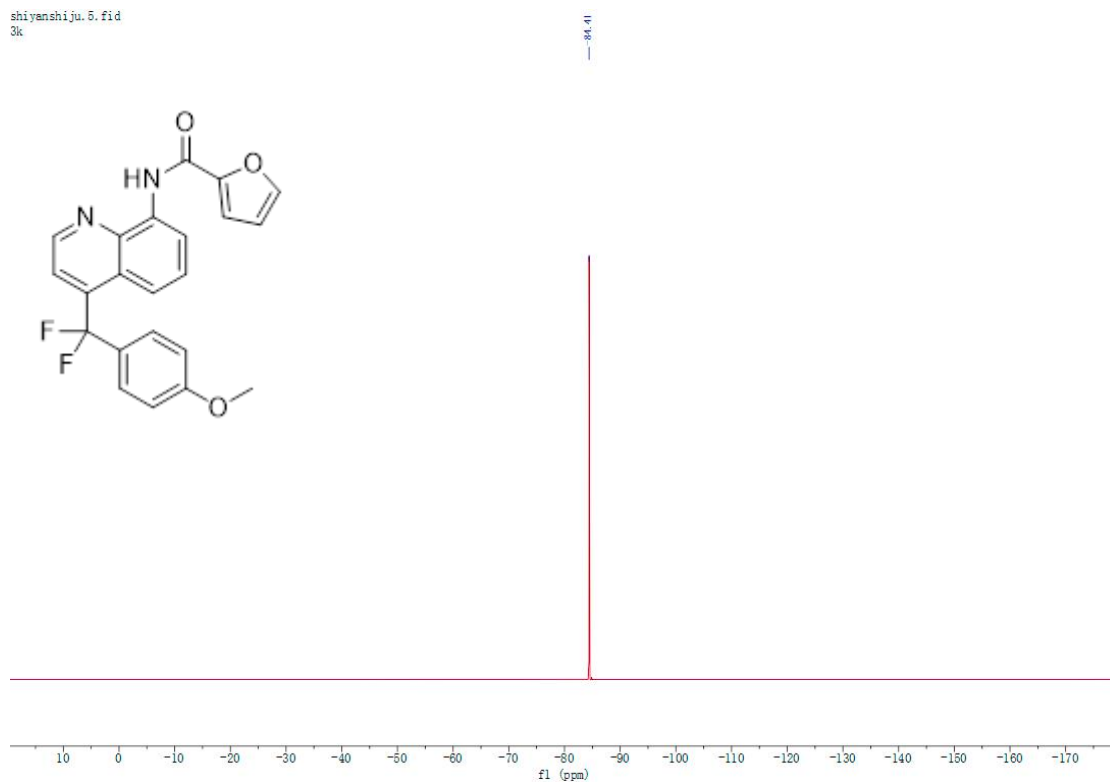

3k-C  
STANDARD 1H OBSERVE - profile

151.78  
142.80  
141.85  
139.82  
134.76  
133.82  
128.45  
127.28  
127.17  
127.05  
124.28  
121.89  
119.54  
119.25  
119.38  
119.23  
116.70  
114.00

55.36

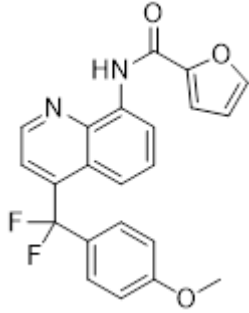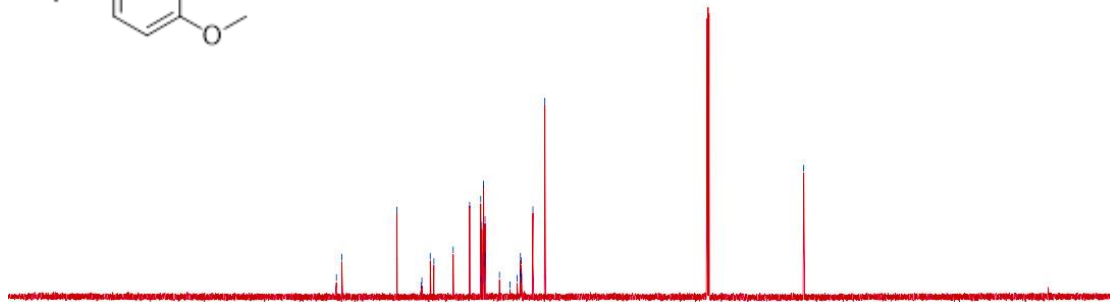

3j-H  
GNU VNMR560

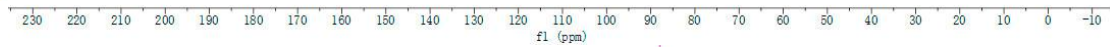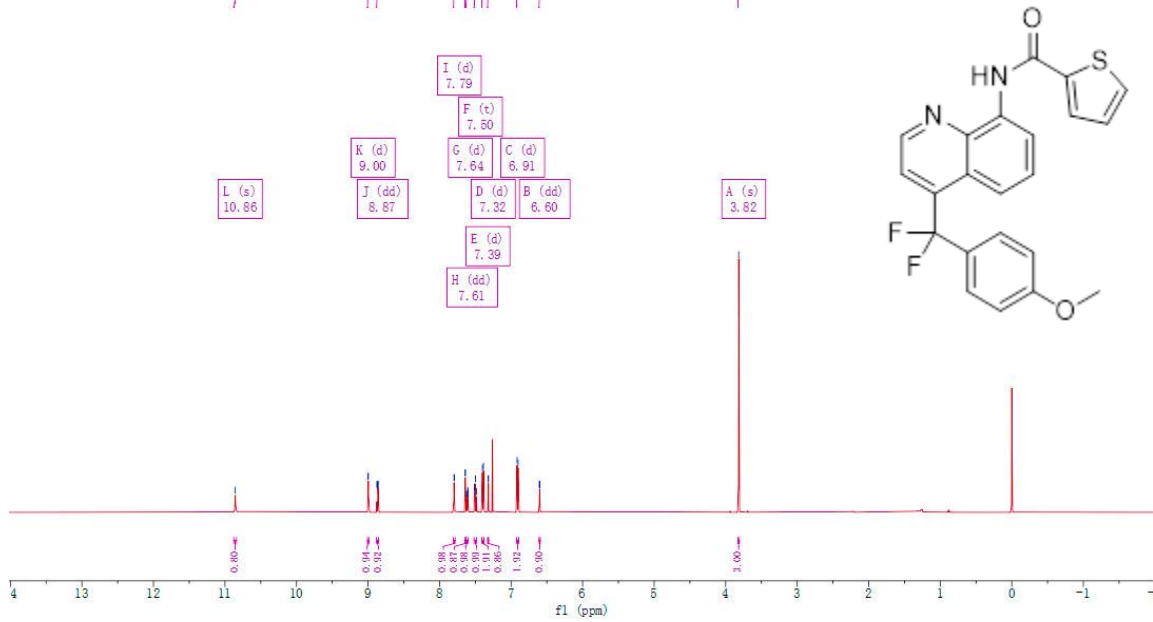

shiyanshiju.6.fid  
3j in CDCl3,19F

— 84.40

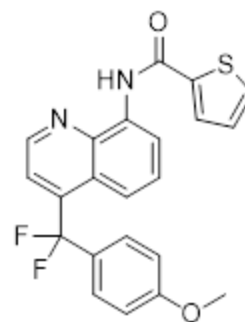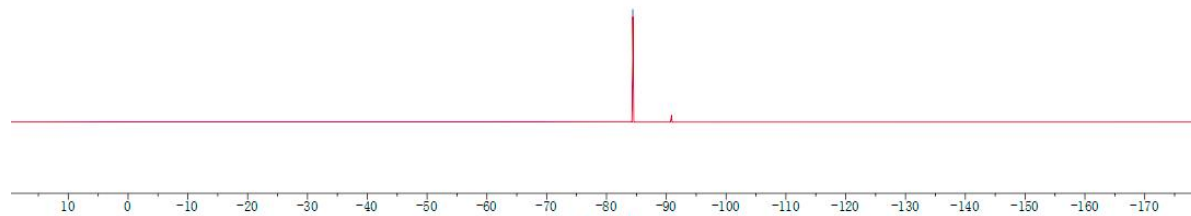

3J-c  
GNU VNMR600

161.20  
156.35  
148.29  
147.57  
147.57  
141.57  
139.28  
138.66  
138.19  
138.19  
137.51  
137.51  
124.29  
120.32  
119.37  
119.37  
116.82  
115.28  
115.28  
112.48

55.35

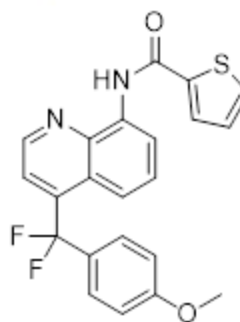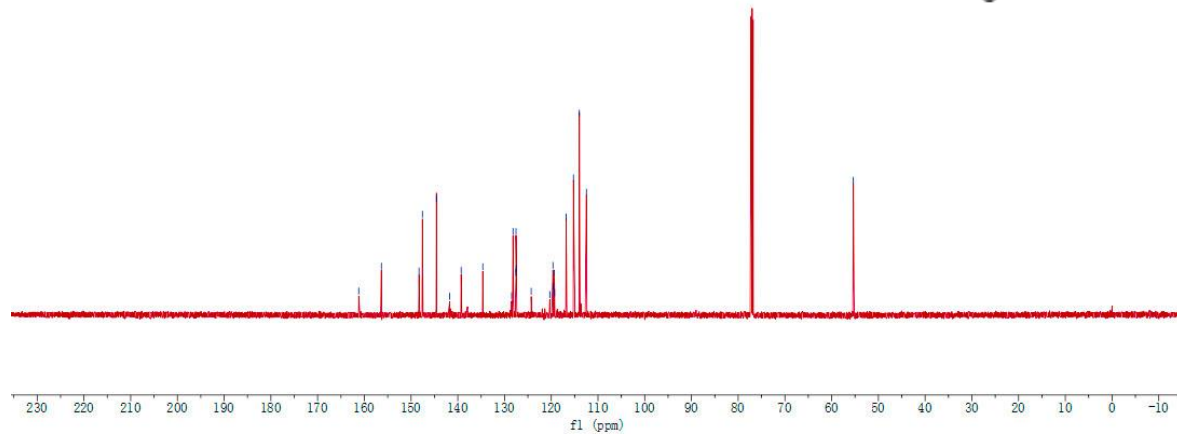

31-H  
STANDARD 1H OBSERVE - profile

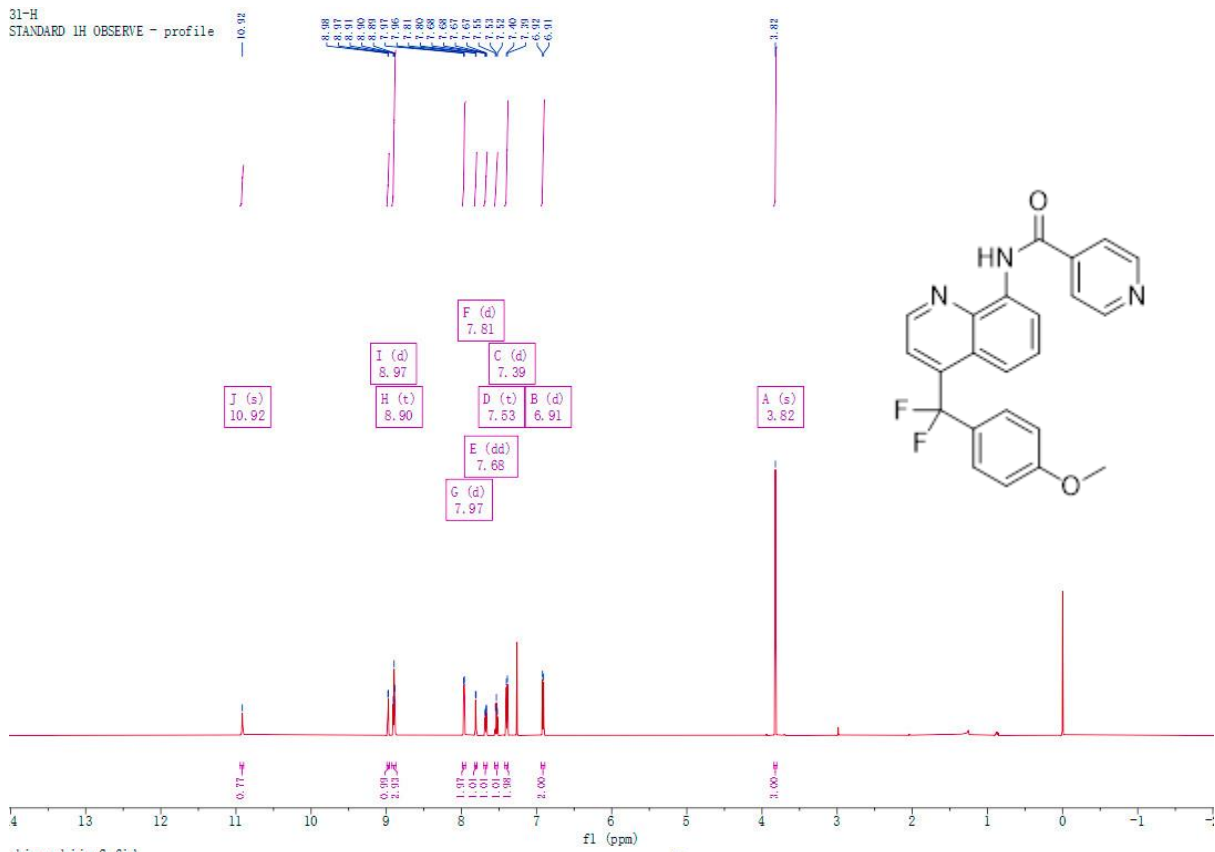

shiyanshiju.6.fid  
31

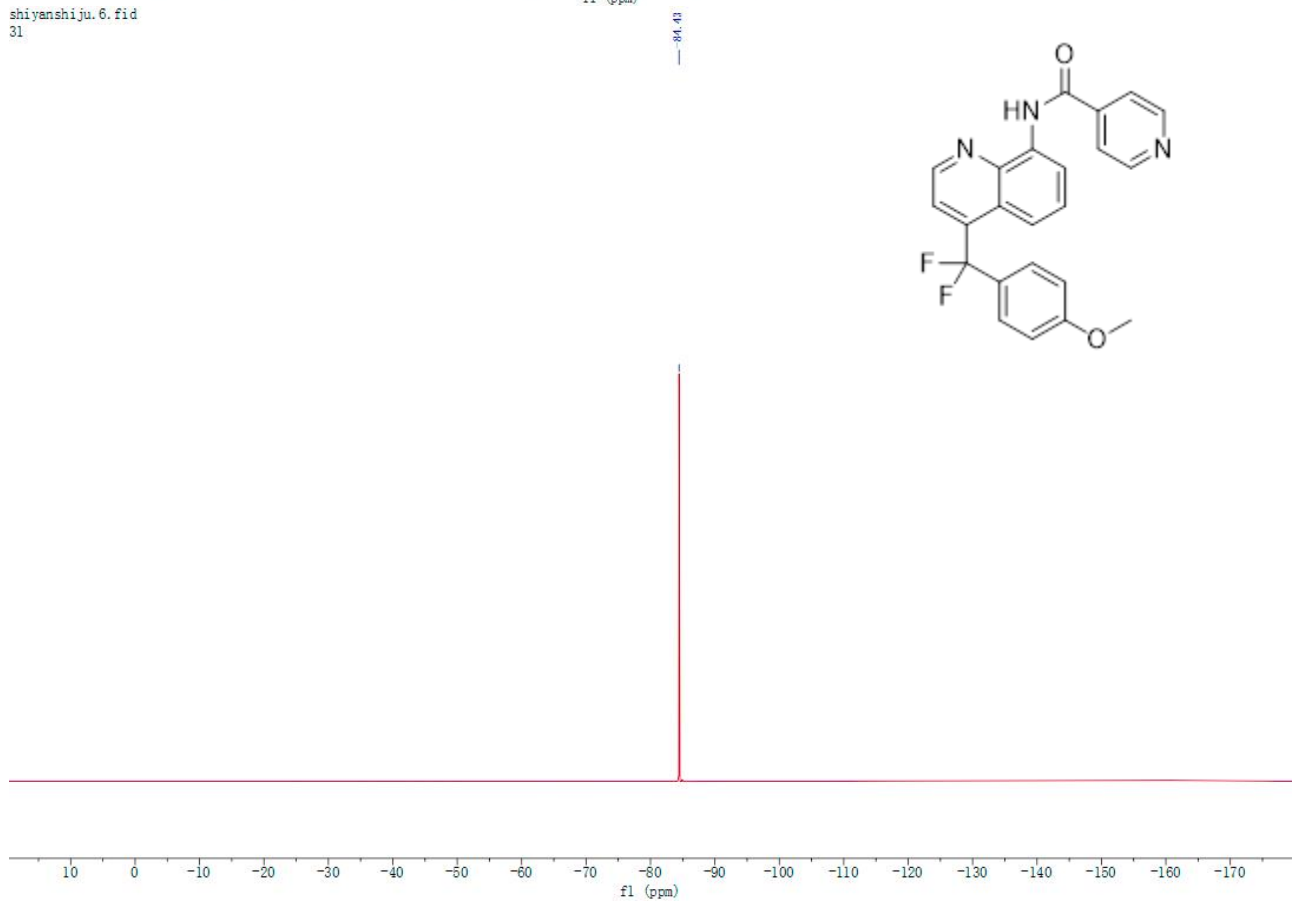

3L-C  
STANDARD 1H OBSERVE - profile

162.18  
161.23  
150.66  
147.75  
142.18  
139.92  
134.77  
128.35  
128.15  
127.51  
127.41  
127.38  
121.09  
119.56  
119.51  
117.90  
114.01

55.36

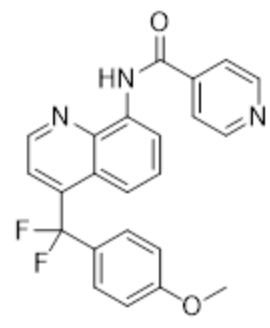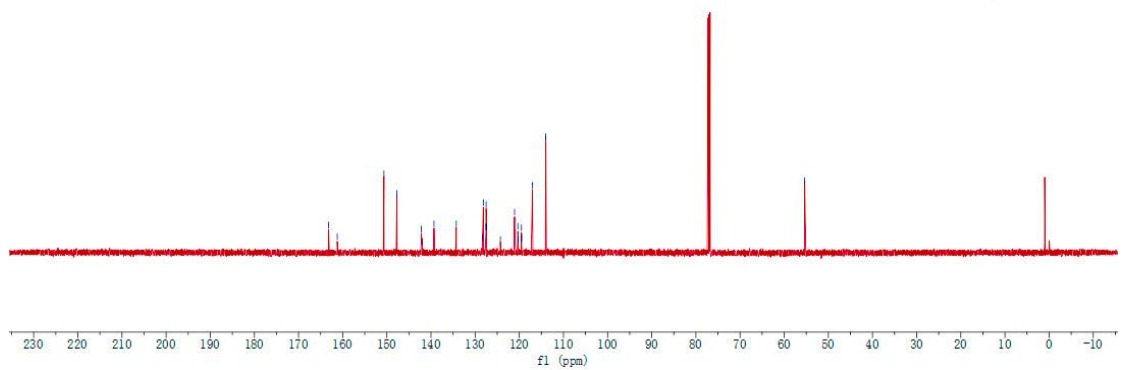

3s  
GNU VNMR5600

10.34  
8.93  
8.92  
8.79  
8.78  
8.77  
8.76  
7.55  
7.54  
7.53  
7.46  
7.44  
7.43  
7.38  
7.36  
7.35  
6.89  
6.88

3.81

1.43

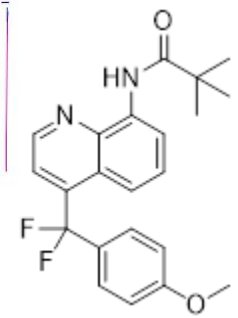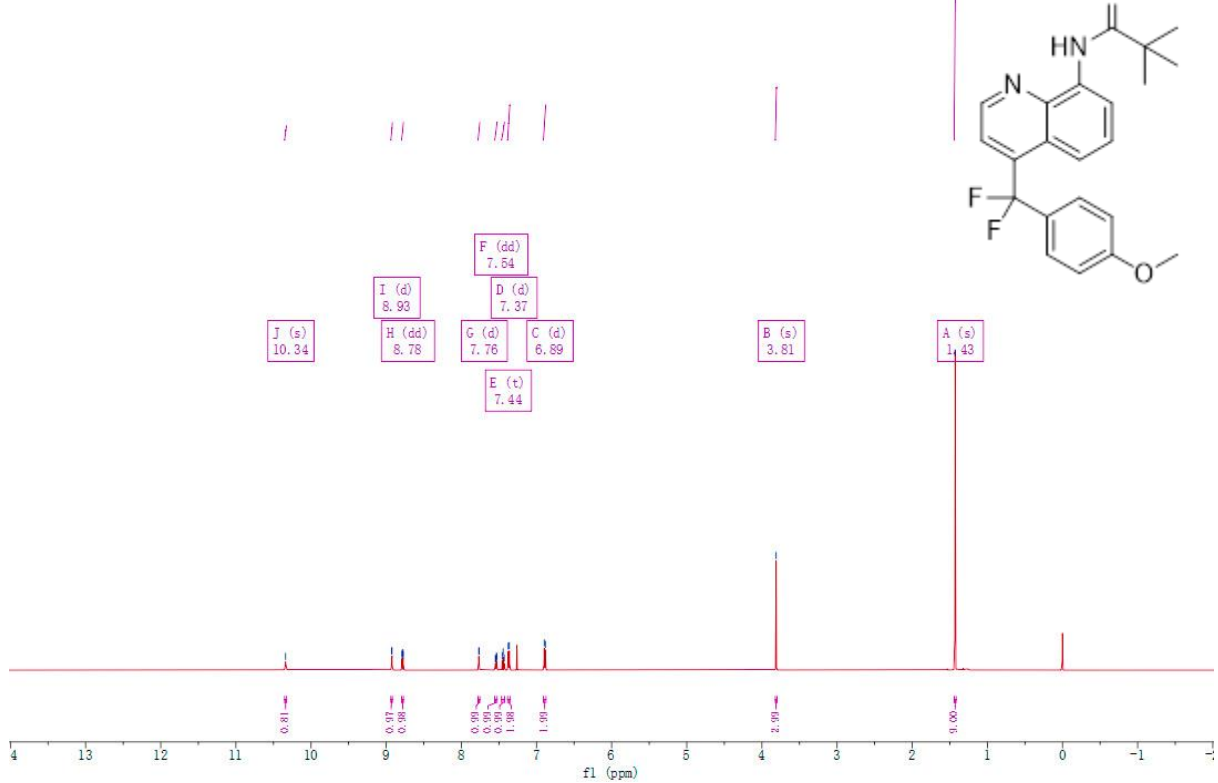

-96.43

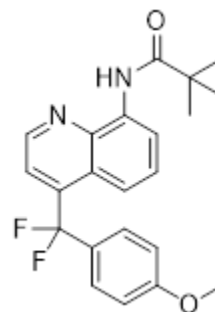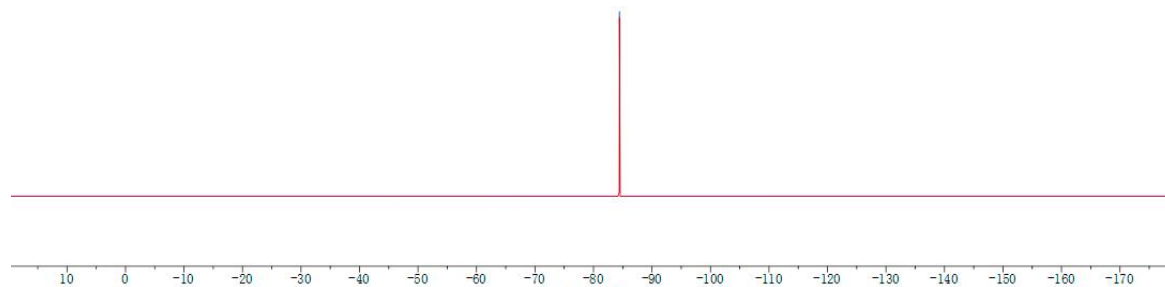

3s-C  
CNU YNMRS600

177.22, 161.17, 147.28, 141.64, 139.45, 135.16, 132.51, 128.51, 127.56, 127.53, 127.49, 124.10, 121.90, 120.30, 119.17, 119.12, 119.07, 119.05, 119.03, 113.95, 55.34, 40.28, 27.71

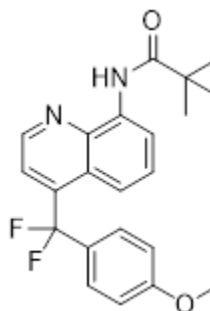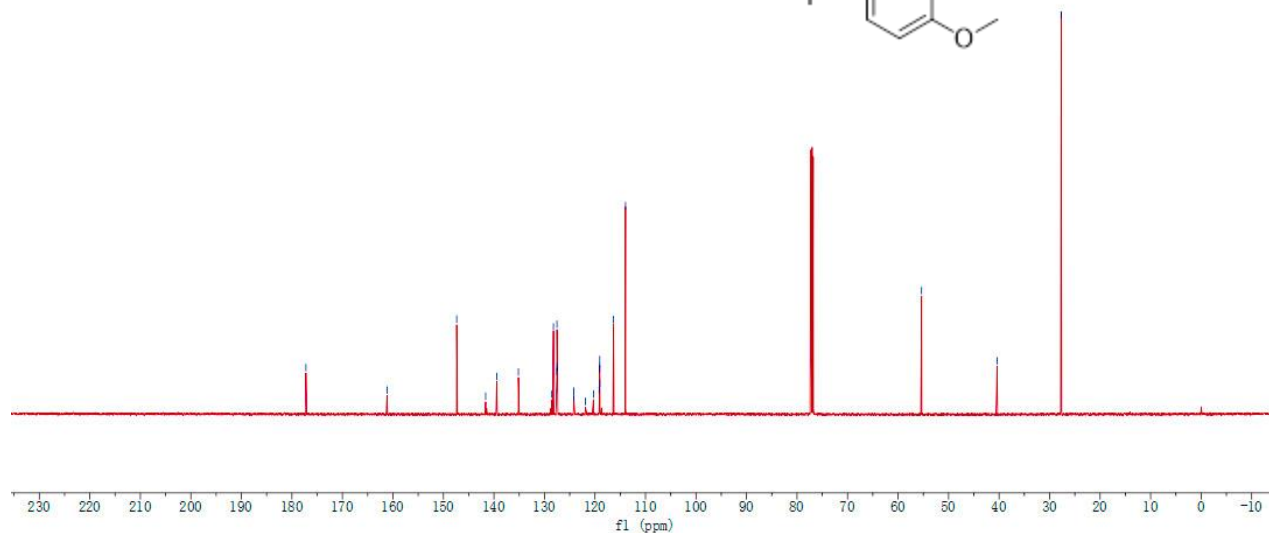



3t-H  
CNV YNMRS600

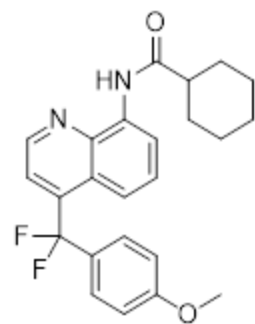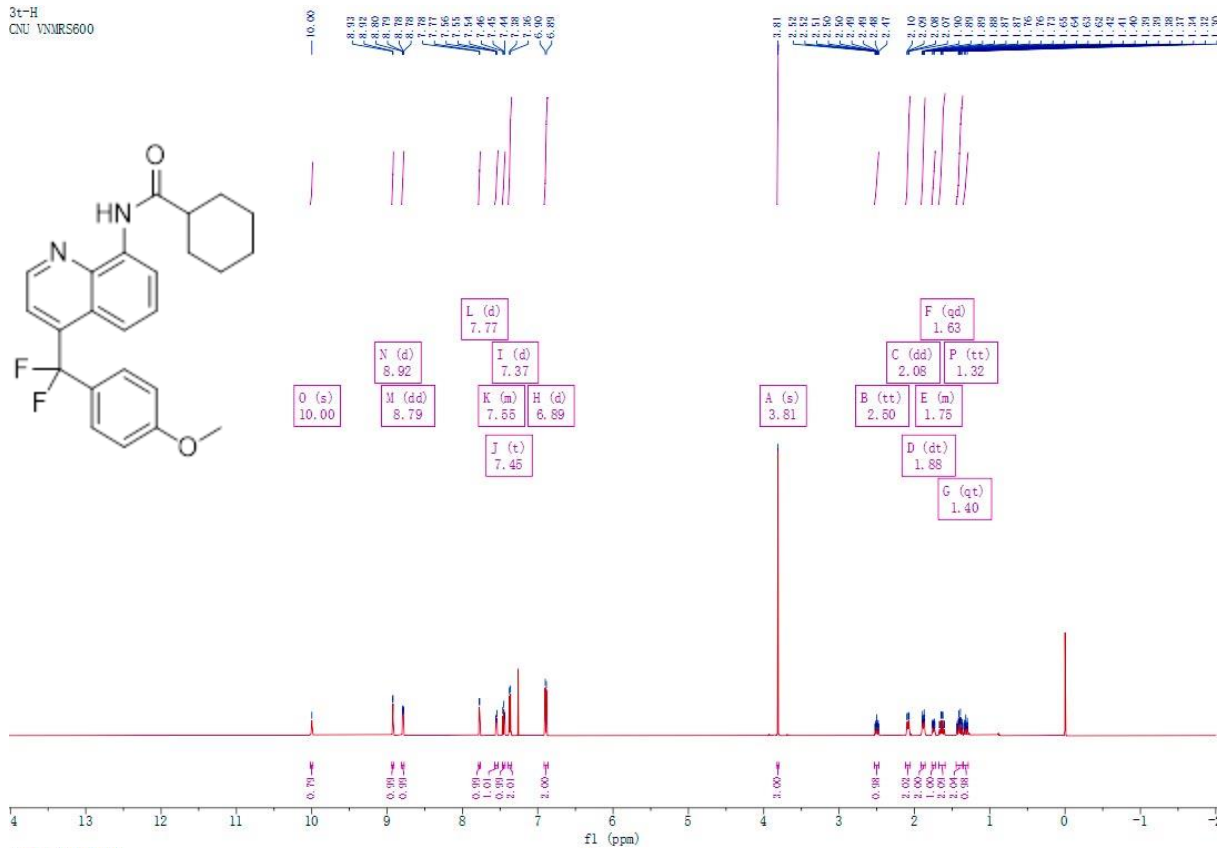

shiyanshiju\_9.fid  
3t in CDCl3, 19F

-84.4

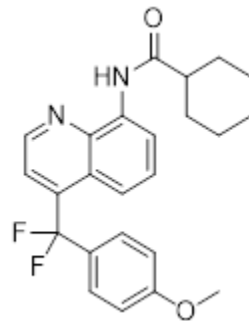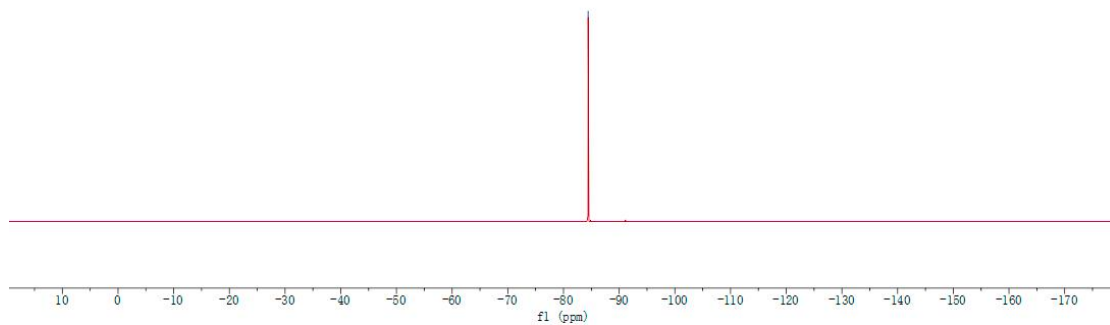

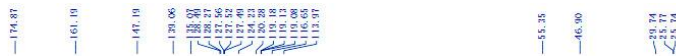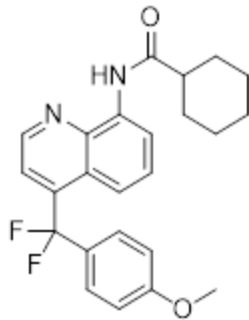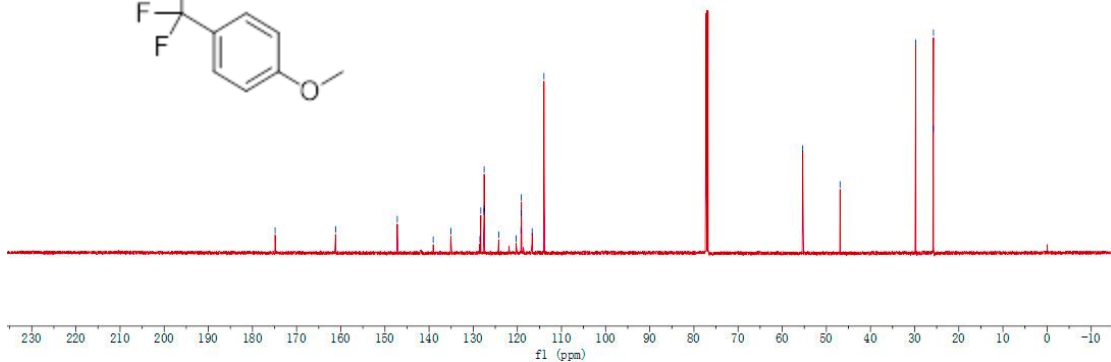

3q-H  
STANDARD 1H OBSERVE - profile

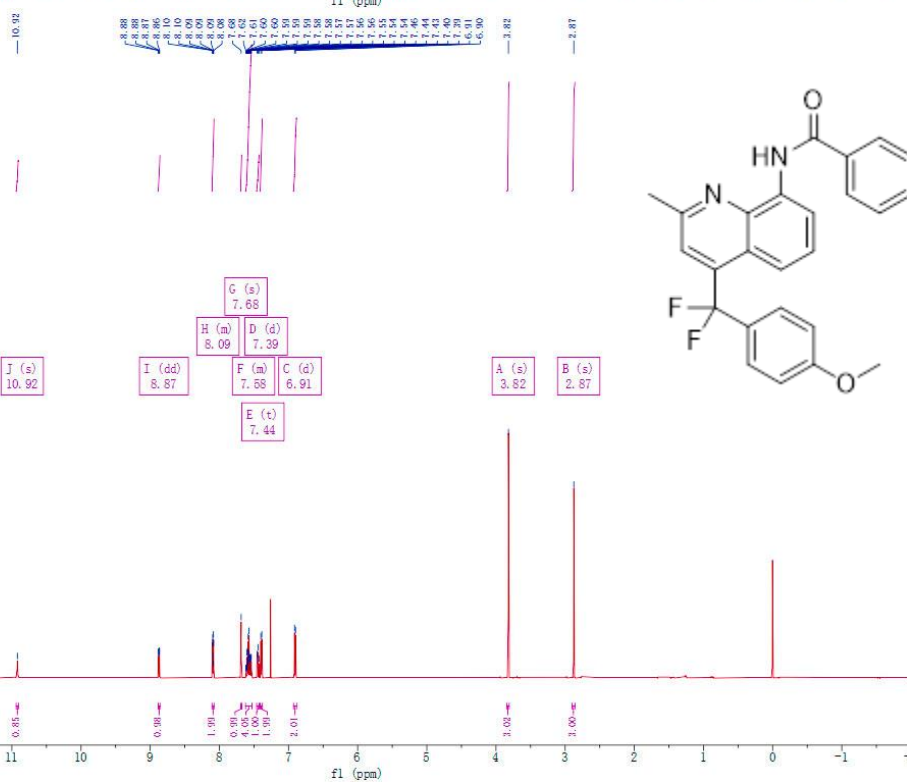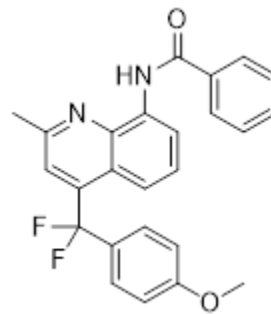

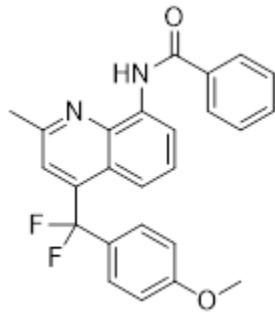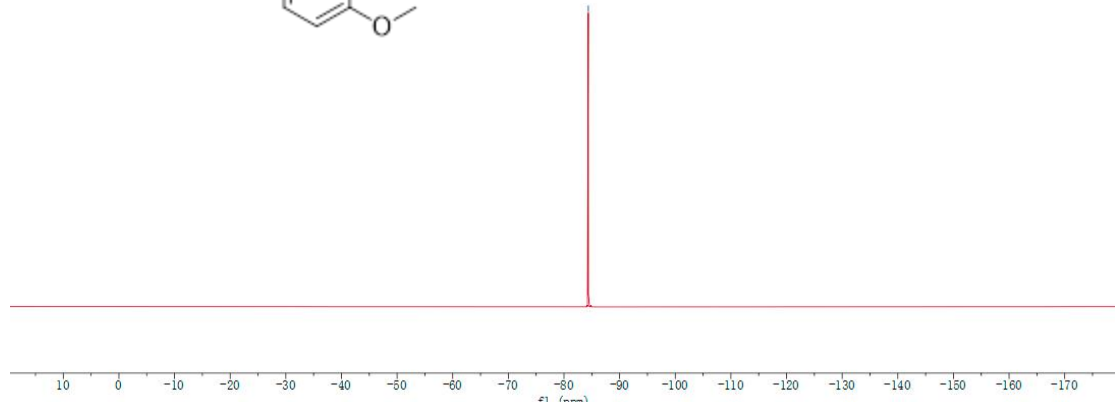

3q-C  
STANDARD 1H OBSERVE - profile

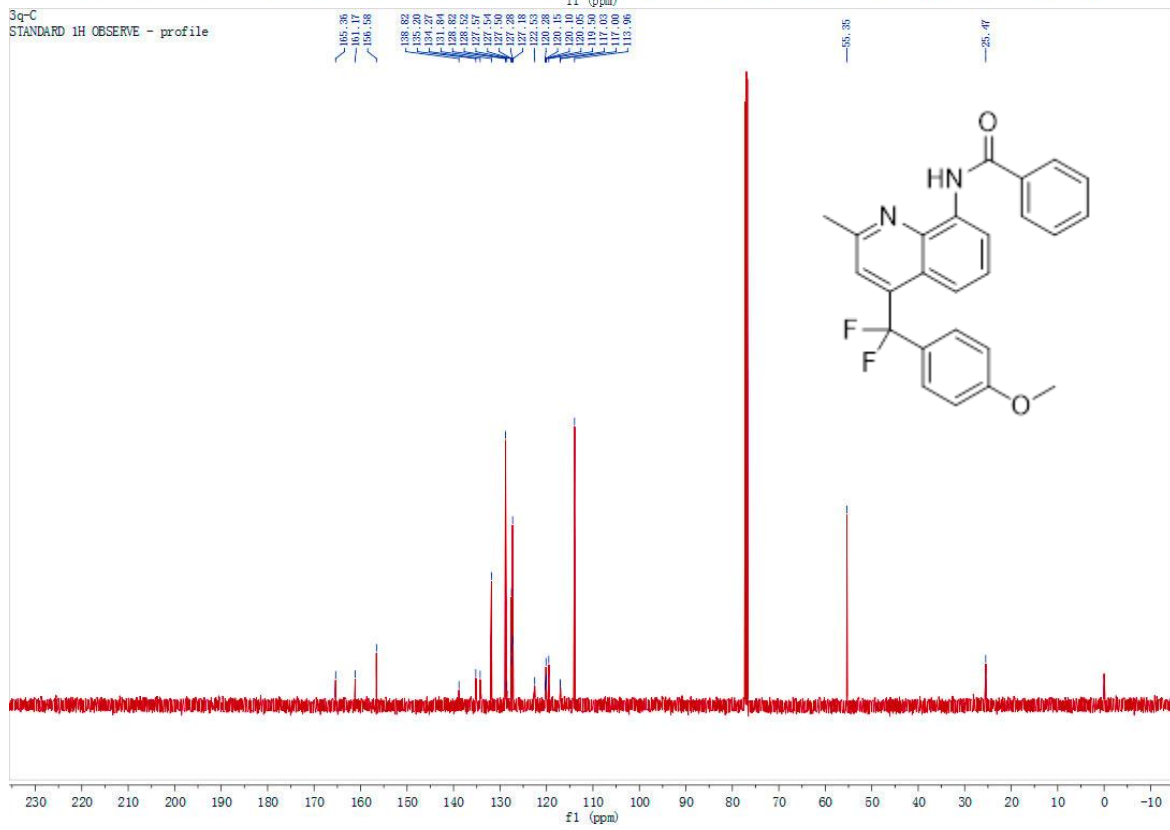

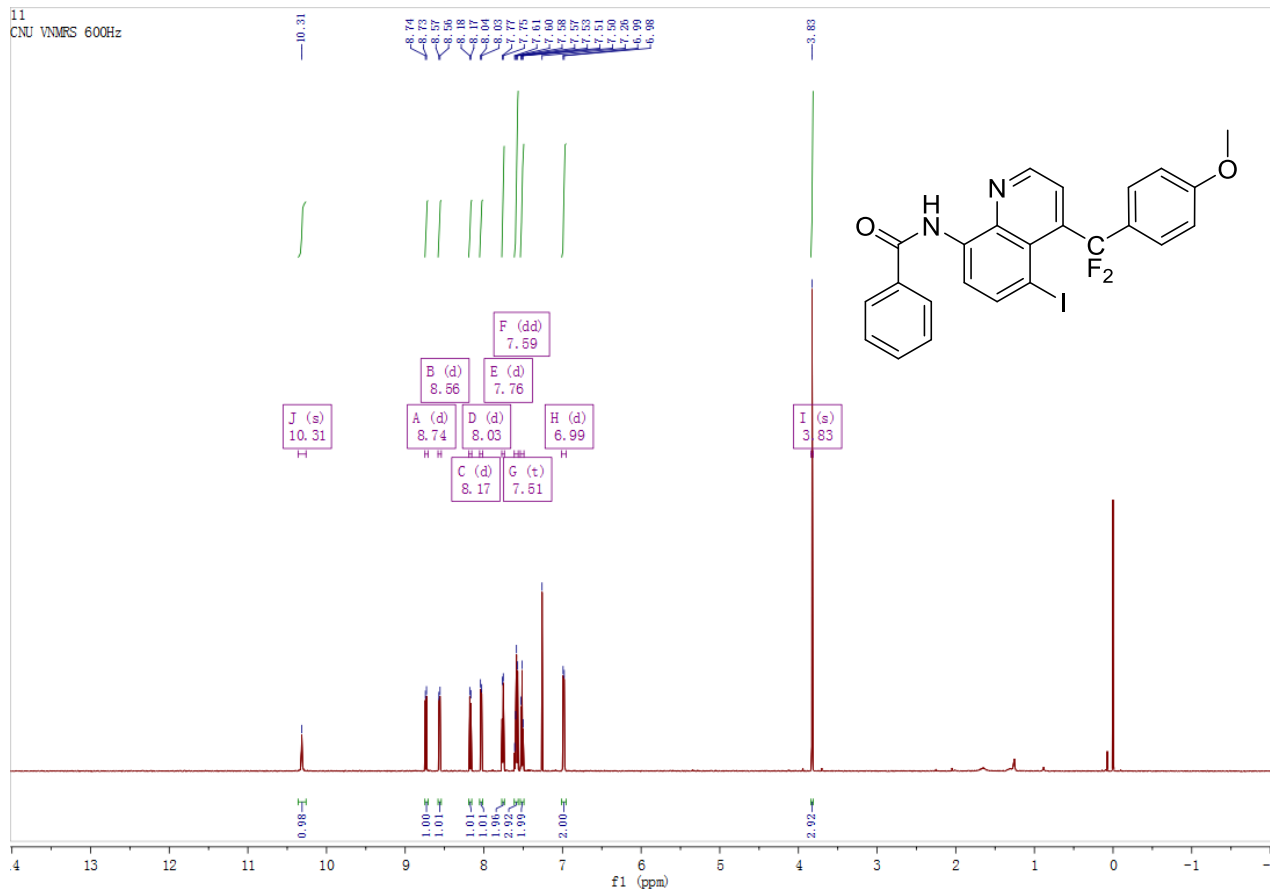

11-c  
STANDARD 1H OBSERVE - profile

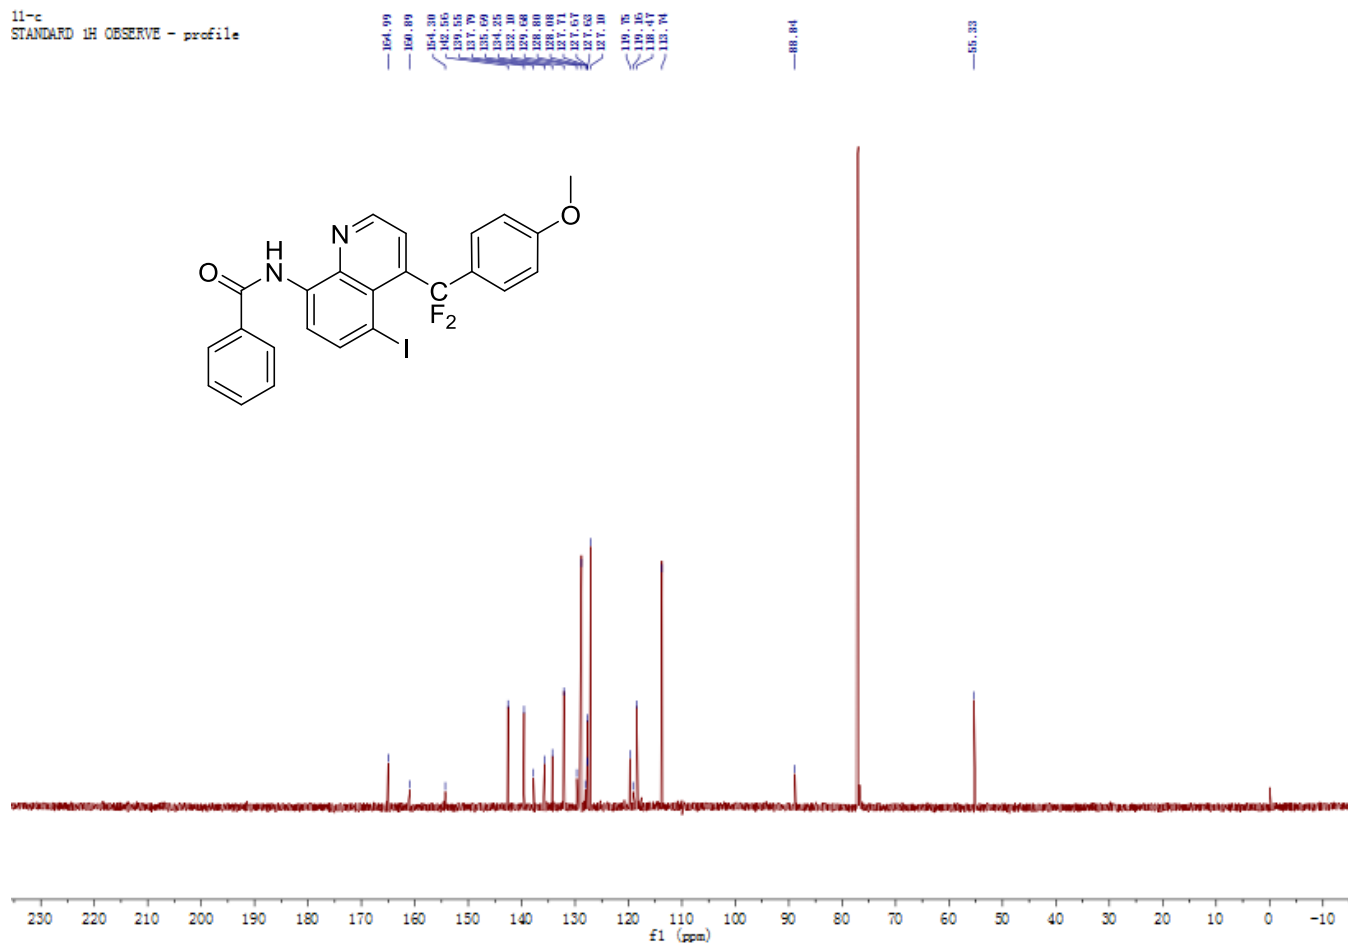

ssd-wly  
11 in CDCl3, 19F

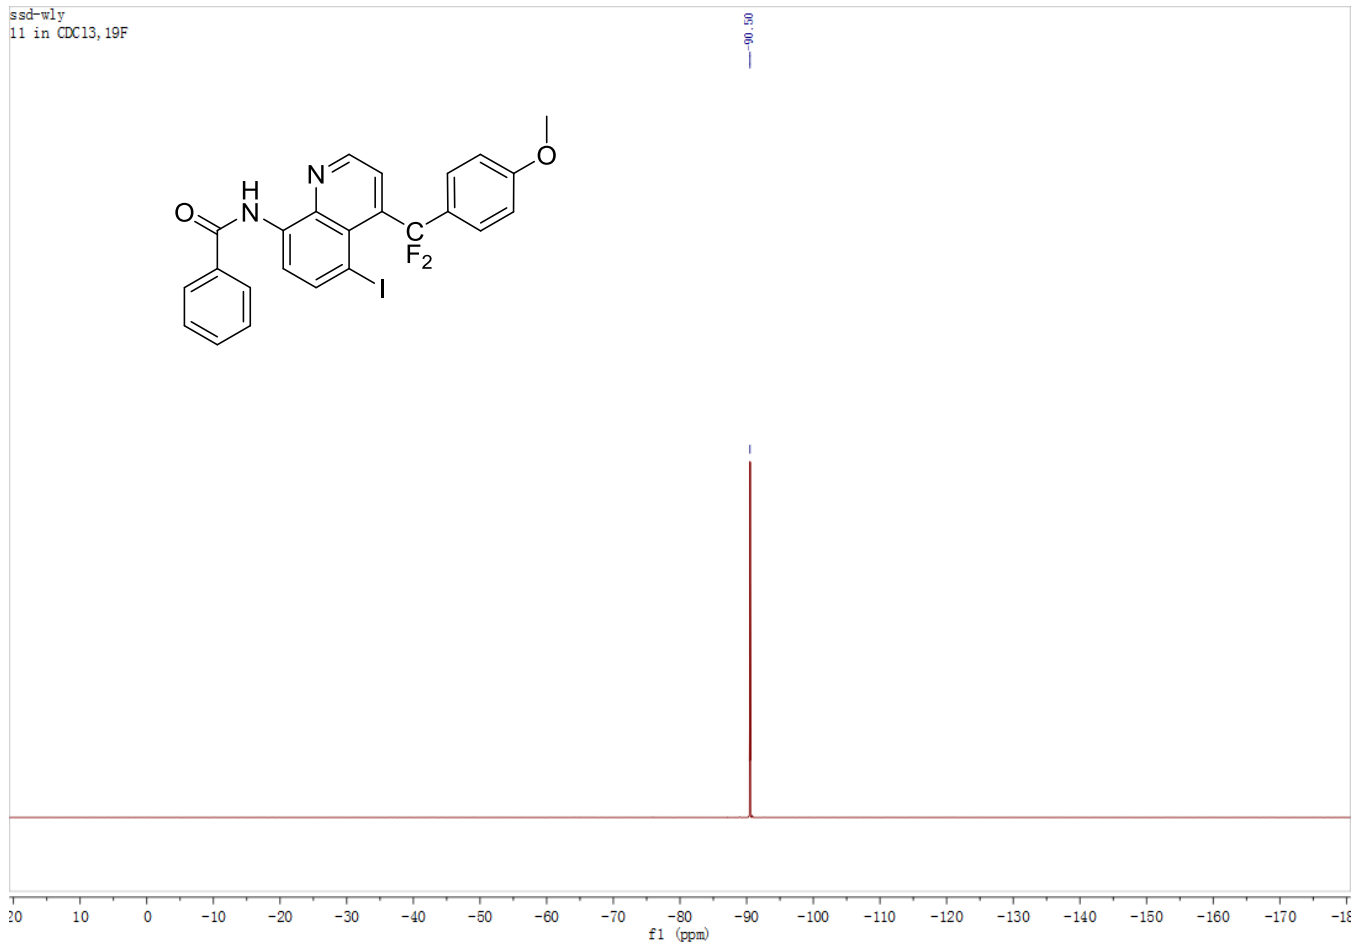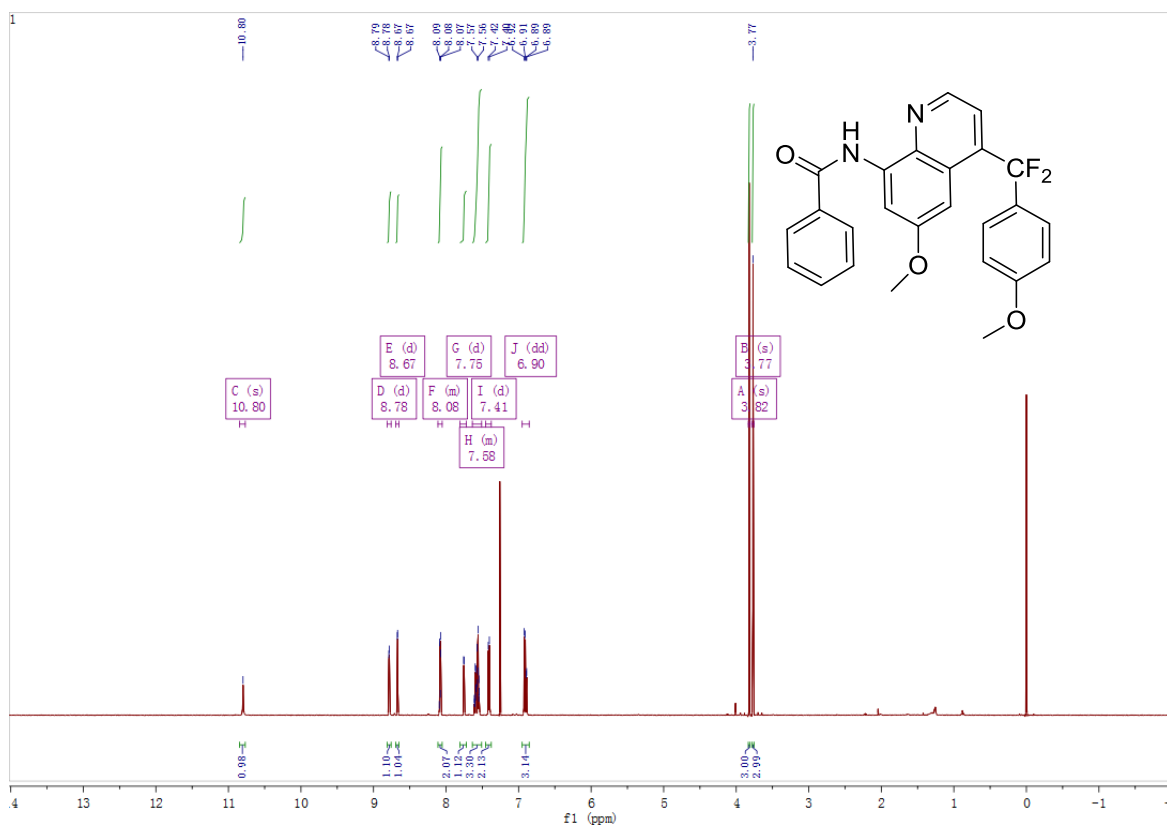

1-c  
STANDARD 1H OBSERVE - profile

160.66  
156.38  
154.01  
139.90  
136.35  
131.33  
131.13  
129.22  
129.07  
122.78  
122.75  
122.71  
122.64  
116.60  
114.96  
109.20  
104.08  
94.00

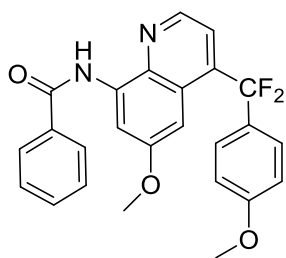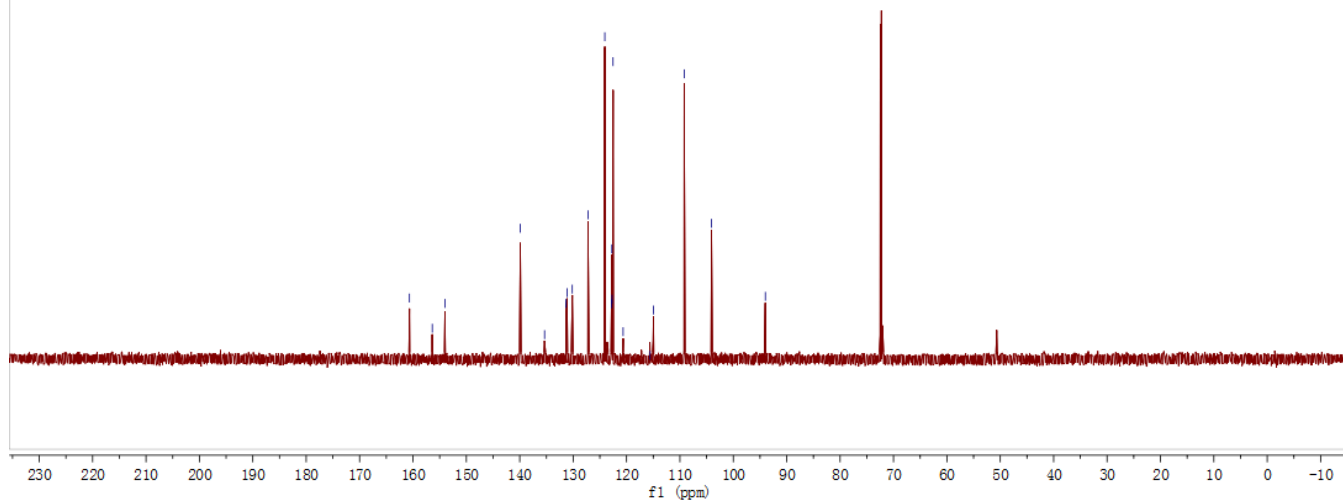

ssd-wly  
1 in CDCl3, 19F

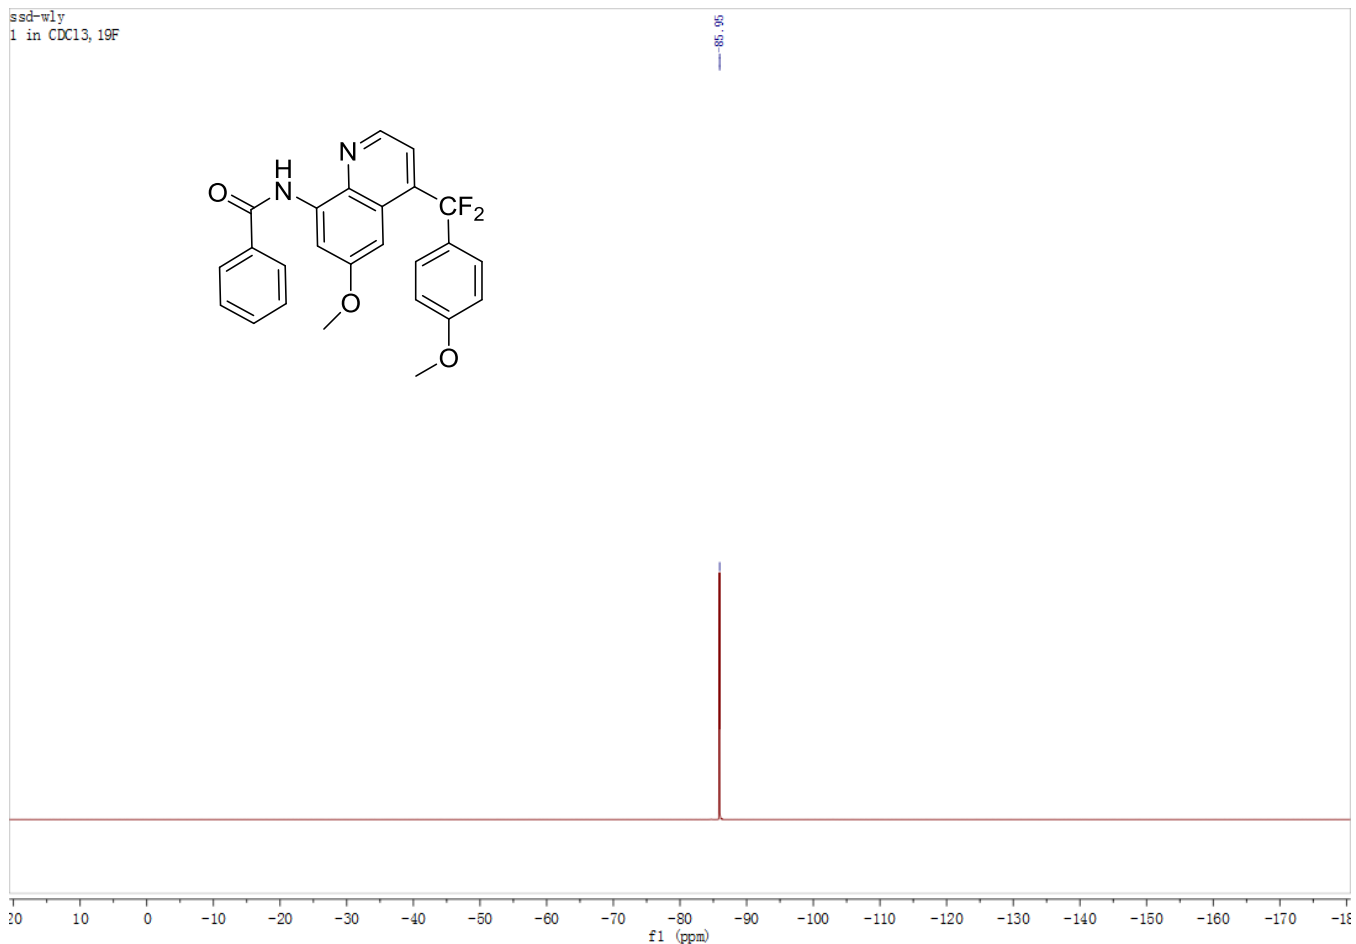

13.2  
CNU VNMR5 600Hz

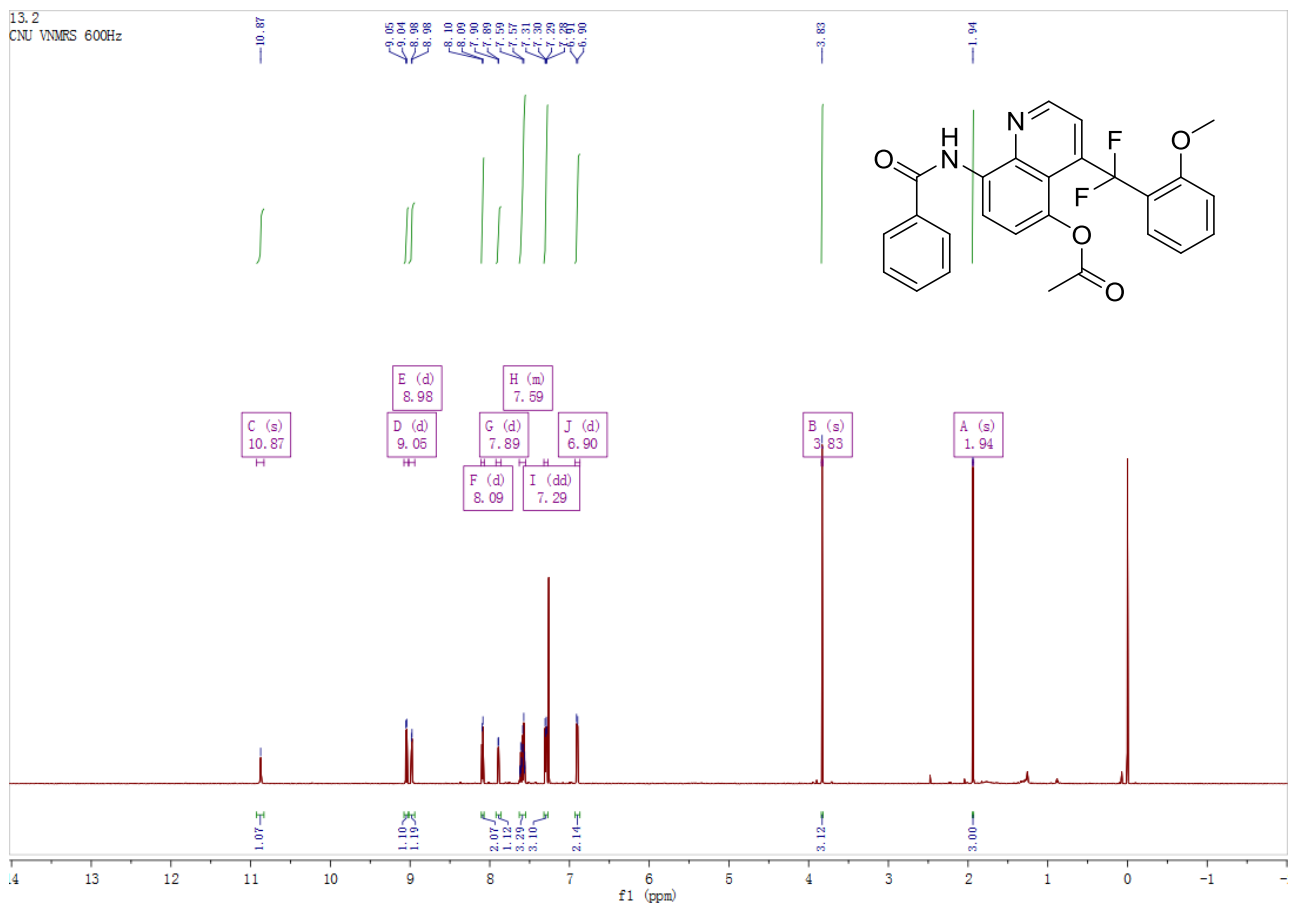

wly-C  
STANDARD 1H OBSERVE - profile

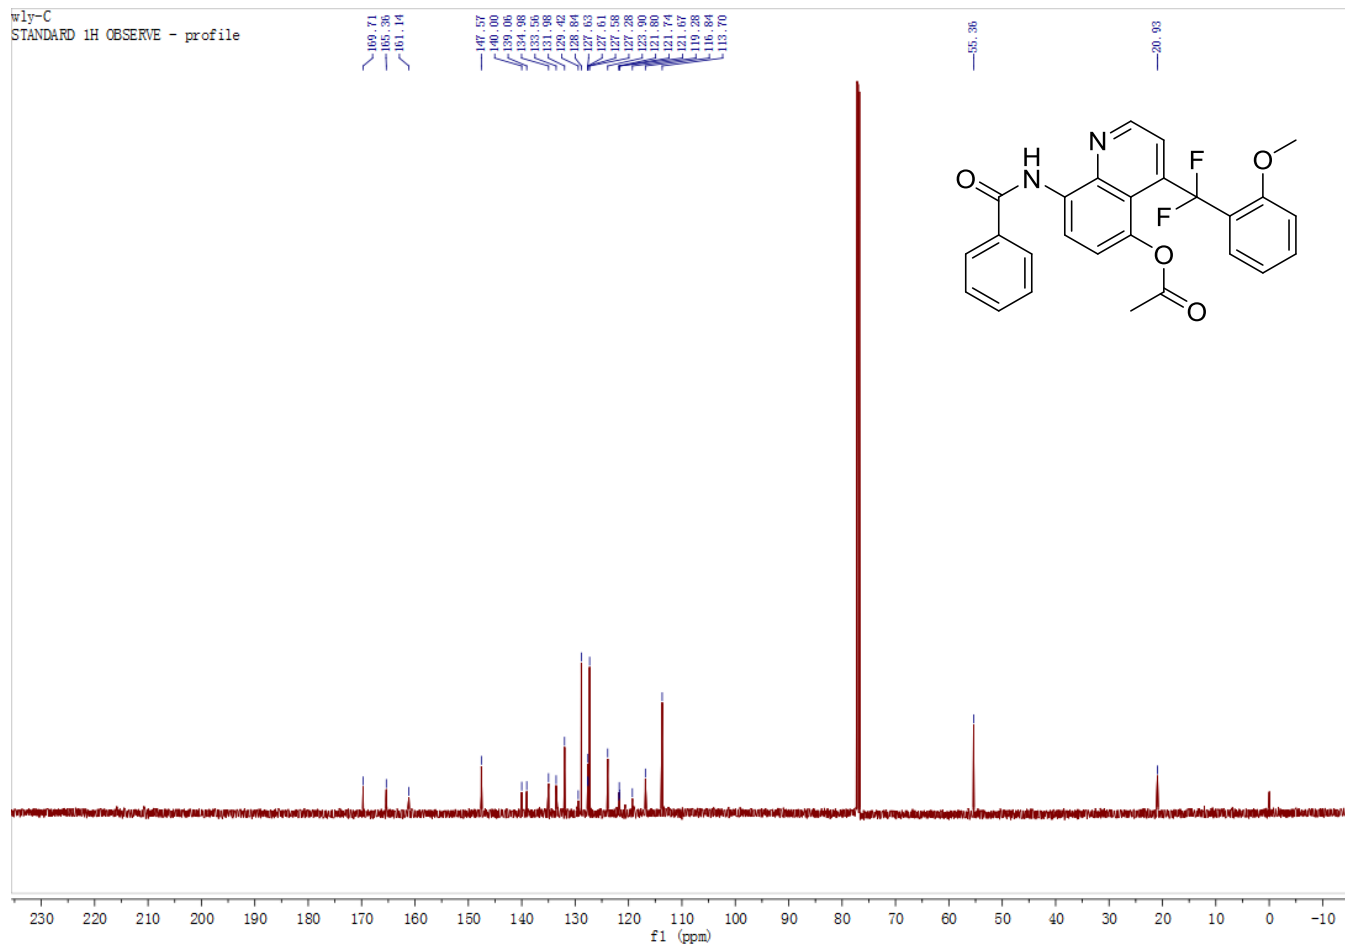

ssd-wly  
13 in CDCl3, 19F

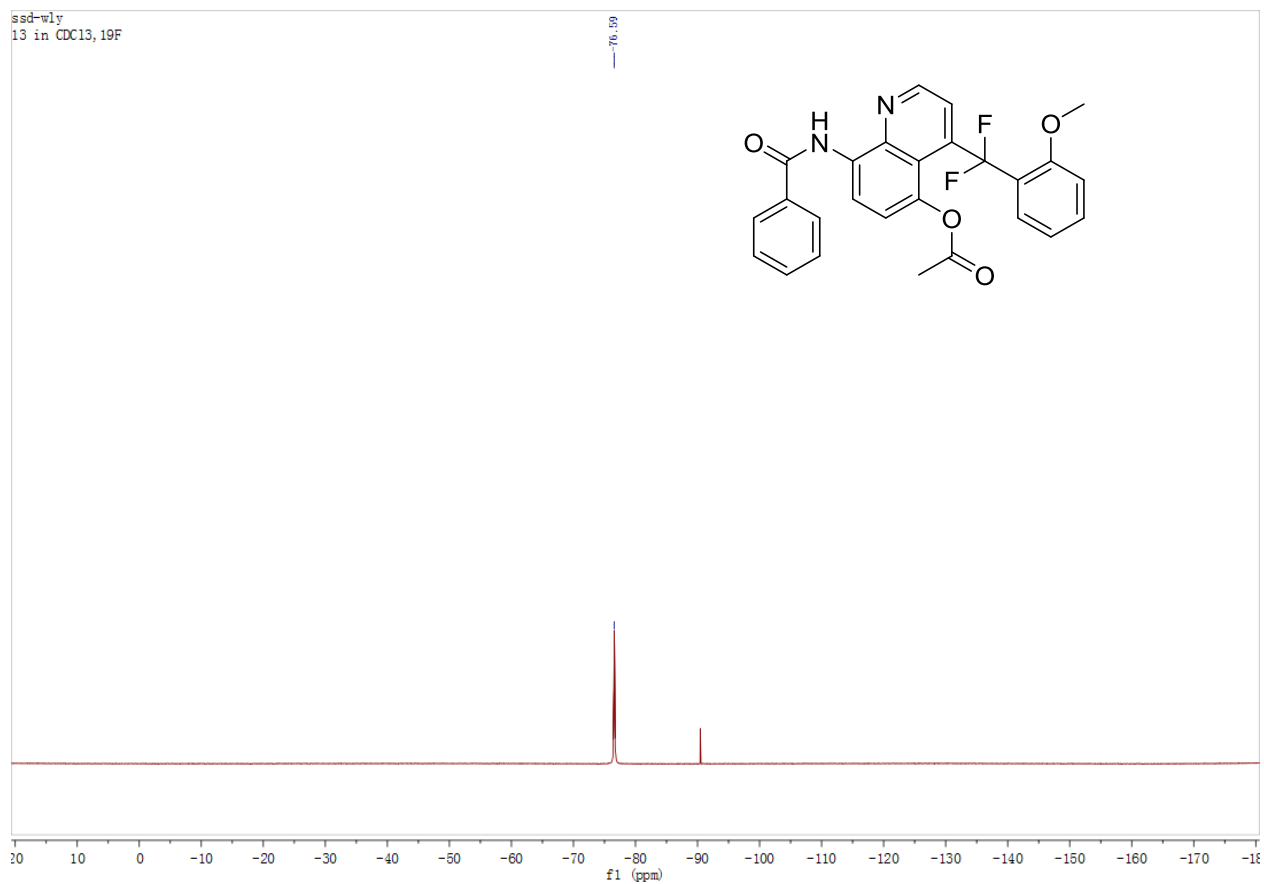



12  
CNH NMR 600Hz

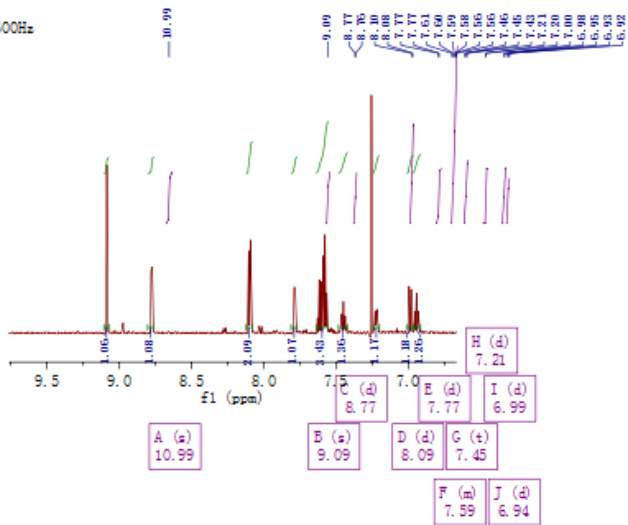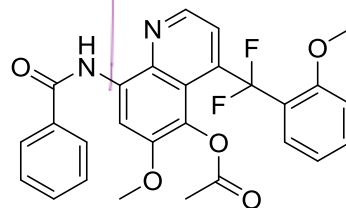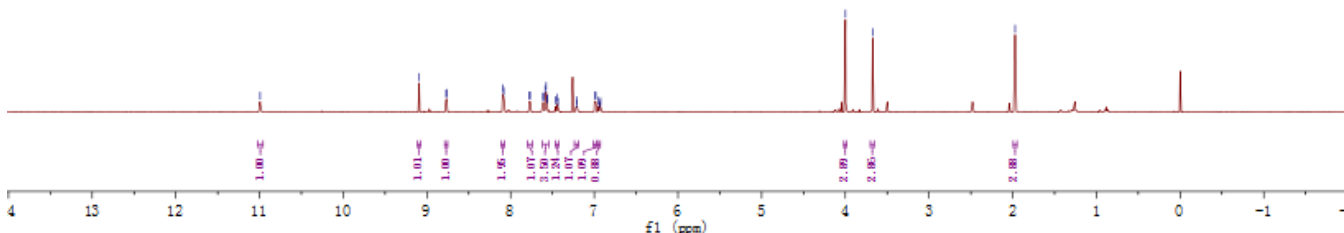

12-c  
STANDARD 1H OBSERVE - profile

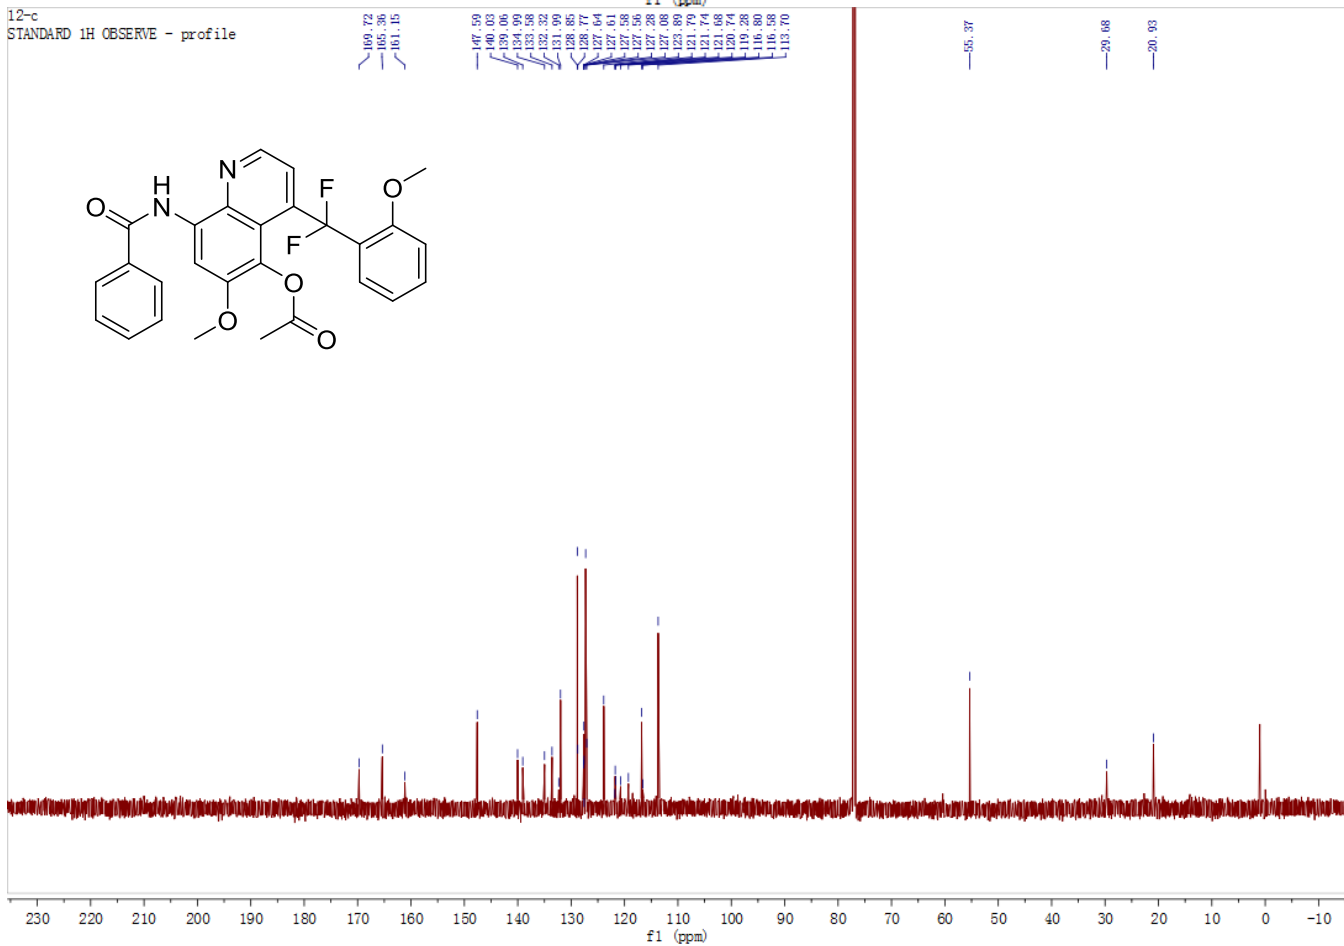

ssd-wly  
12 in CDCl3, 19F

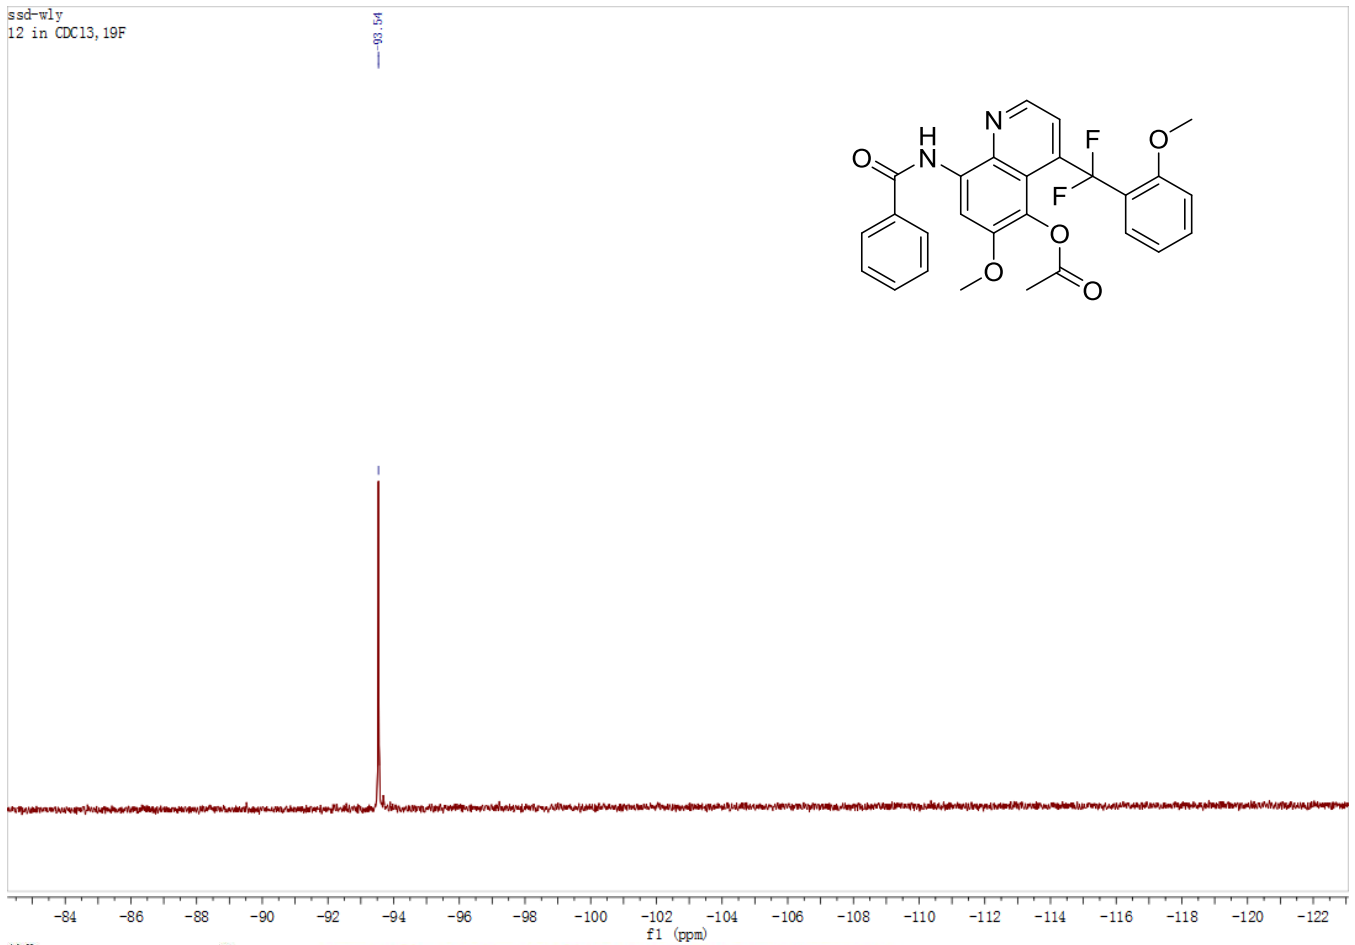

4d-H  
GNU VNMR600

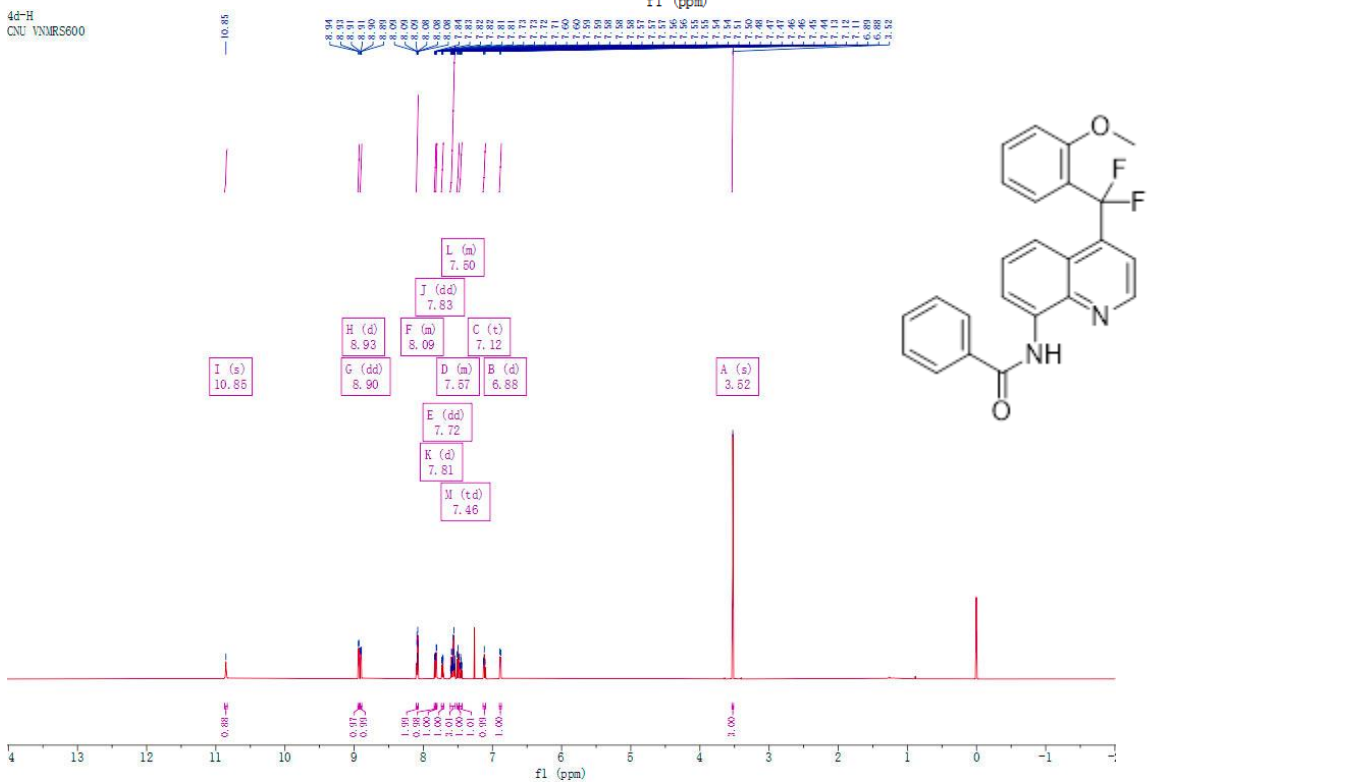

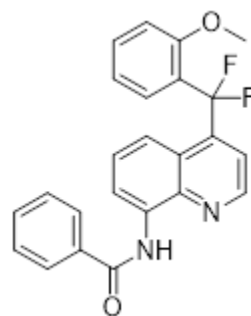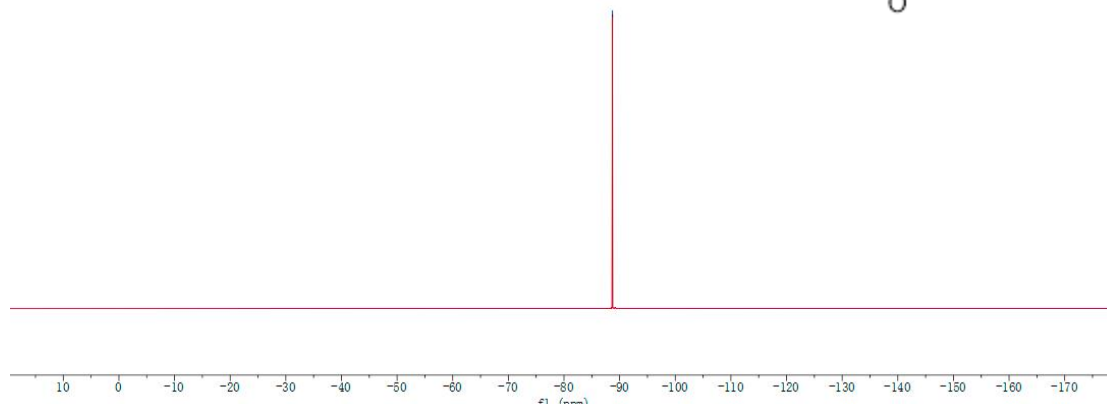

4d-C  
CNU VNMR5600

165.43  
157.08  
147.23  
146.96  
135.15  
134.54  
134.54  
132.37  
131.87  
131.87  
127.88  
127.29  
127.15  
127.10  
124.14  
120.69  
119.84  
119.79  
119.11  
119.02  
119.02  
116.90  
112.25

— 55.37

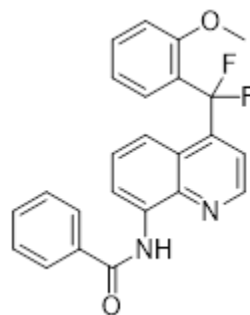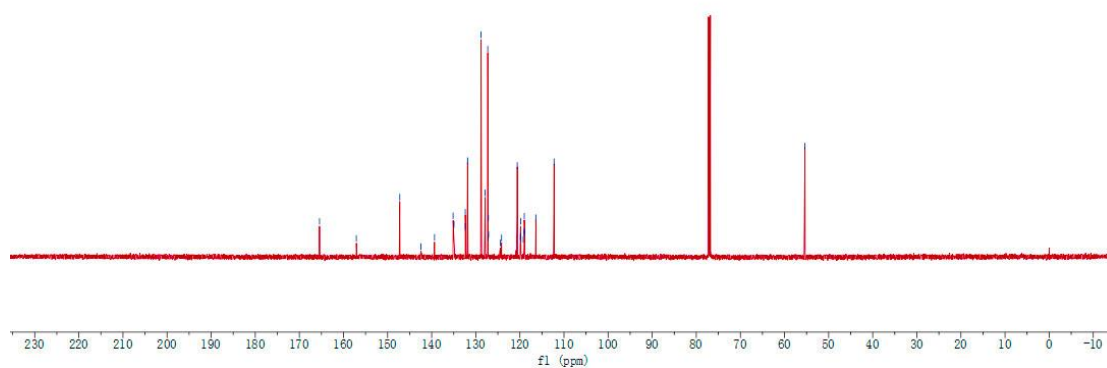

4e-H  
STANDARD 1H OBSERVE - profile

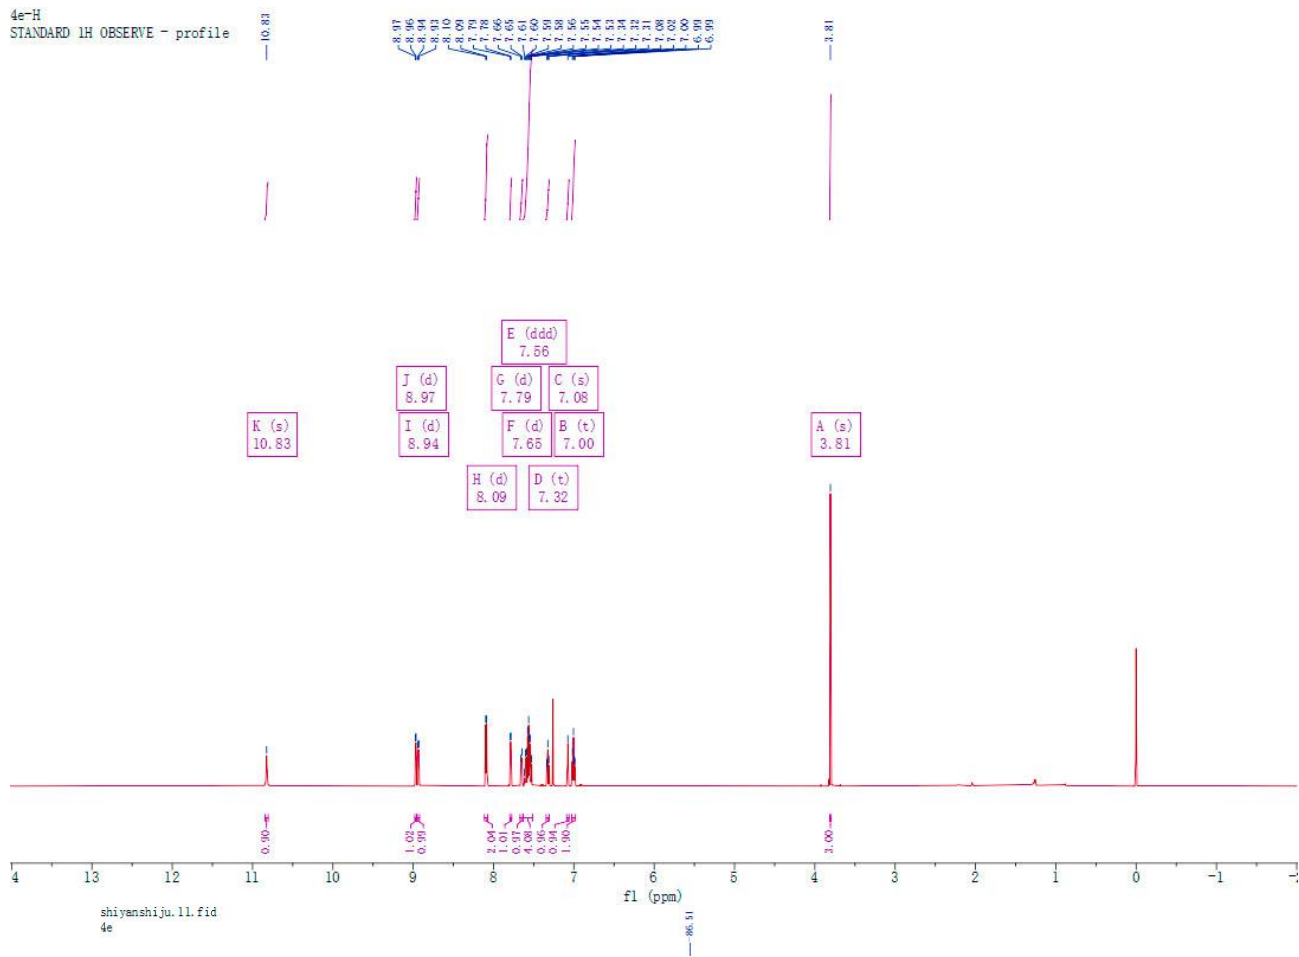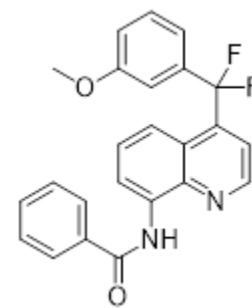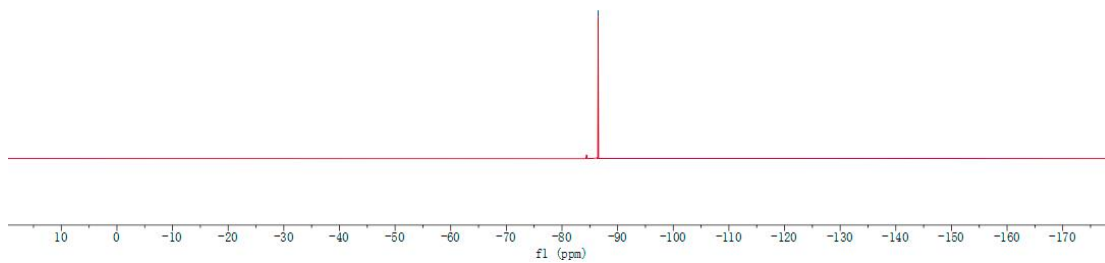

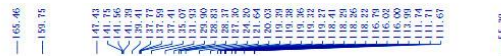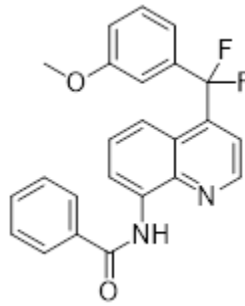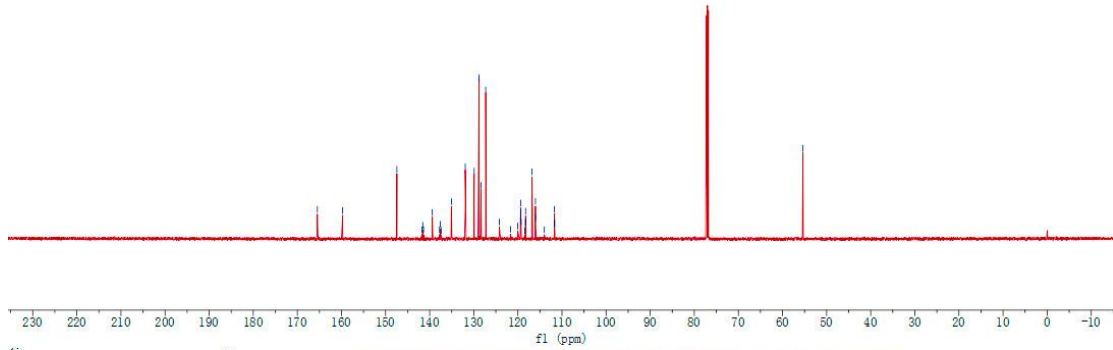

4f  
STANDARD PROTON PARAMETERS

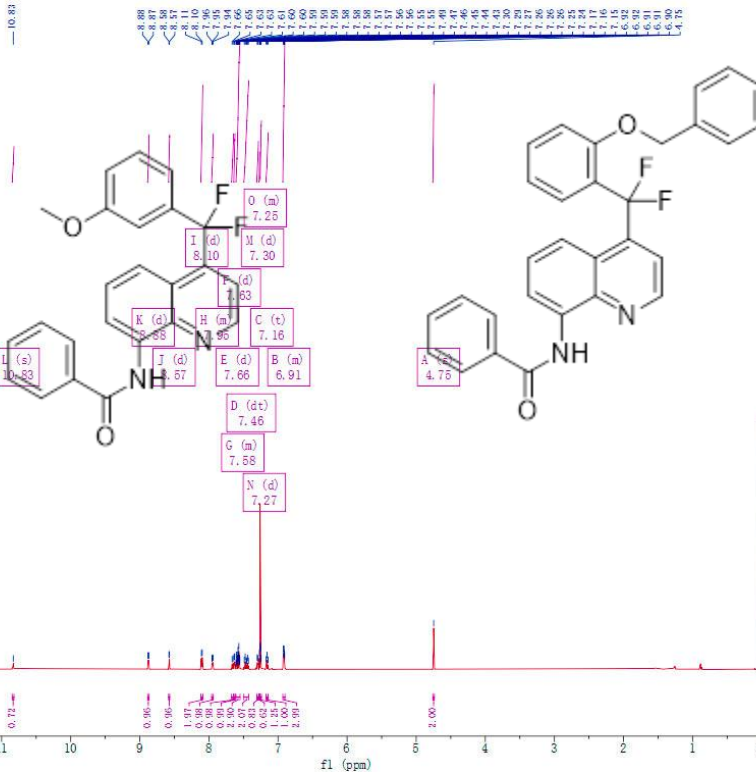

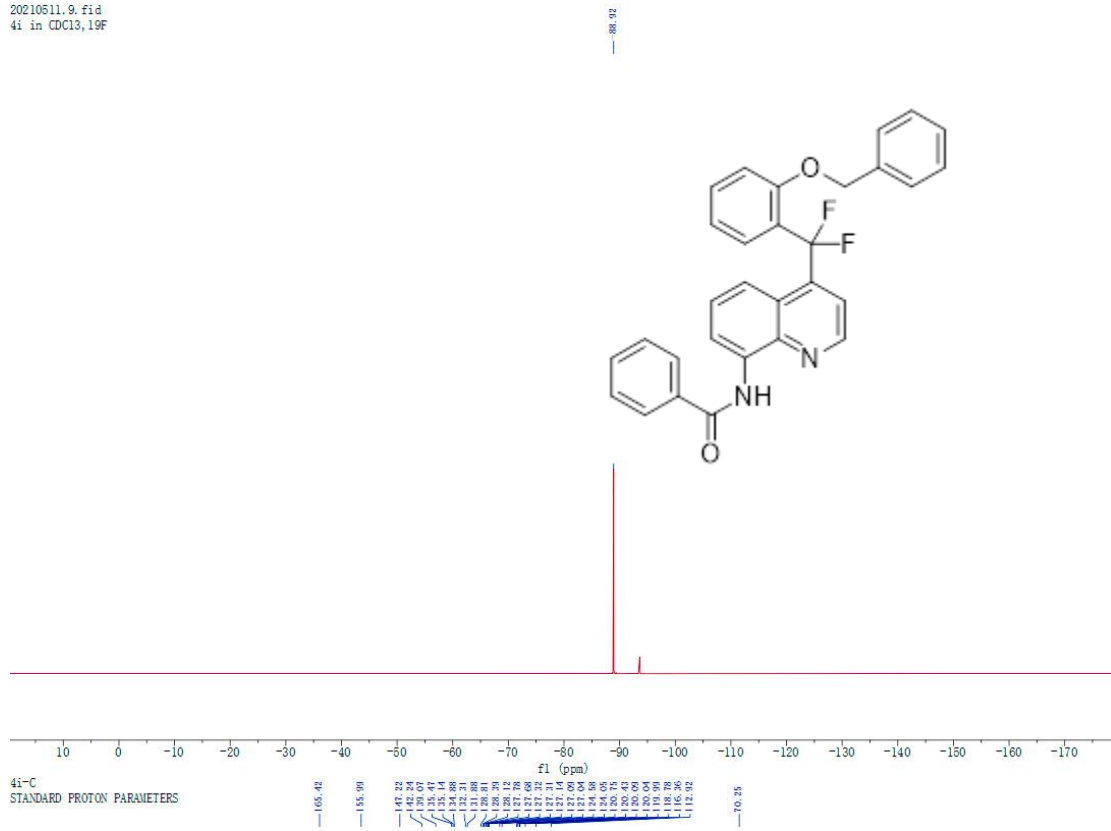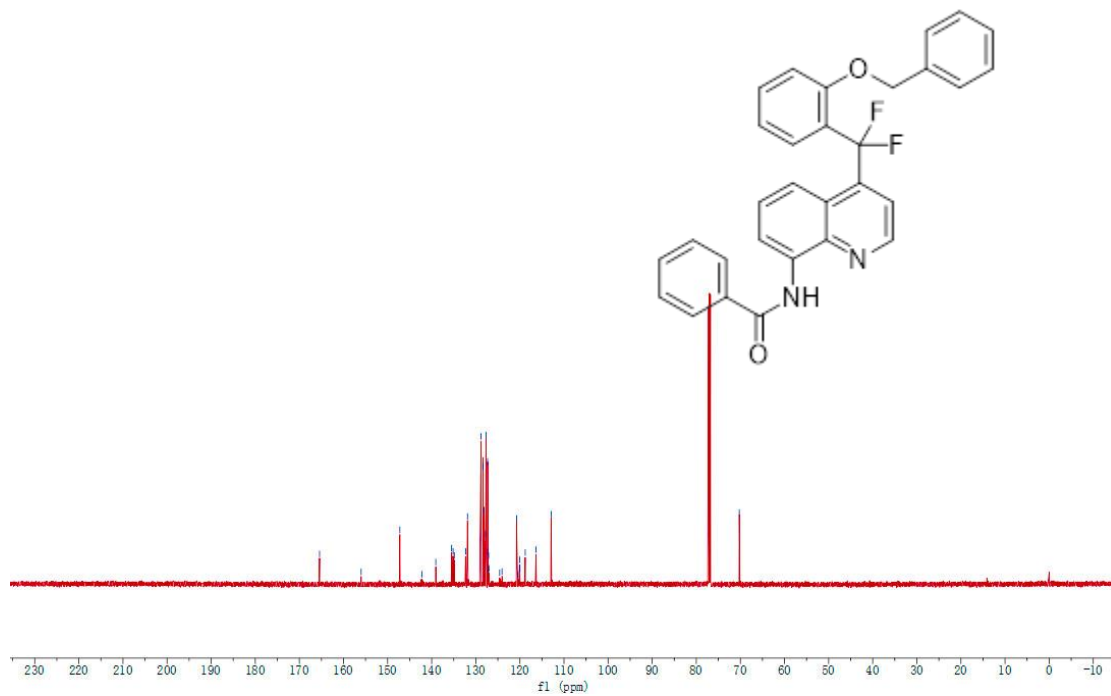

4j-H  
CNV VNMR600

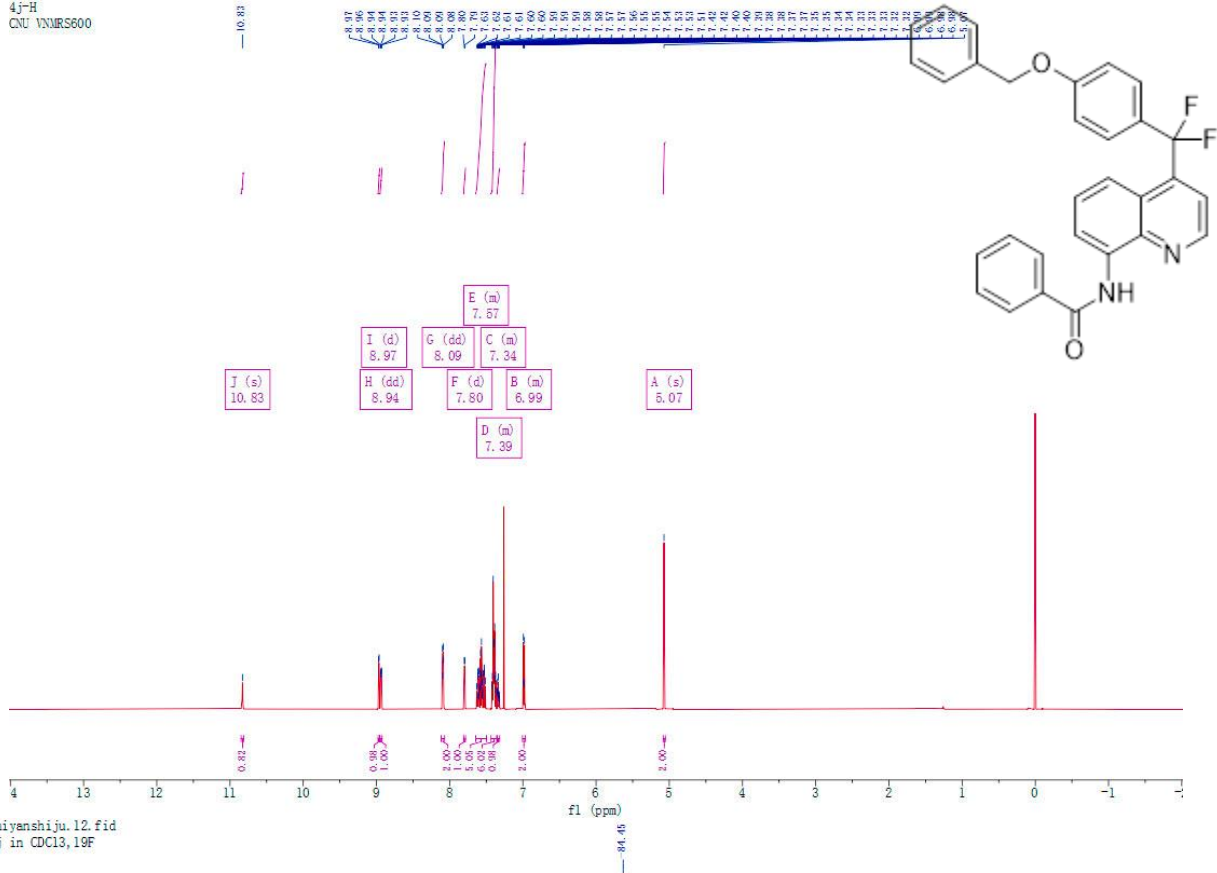

shiyanshiju.12.fid  
4j in CDCl3,19F

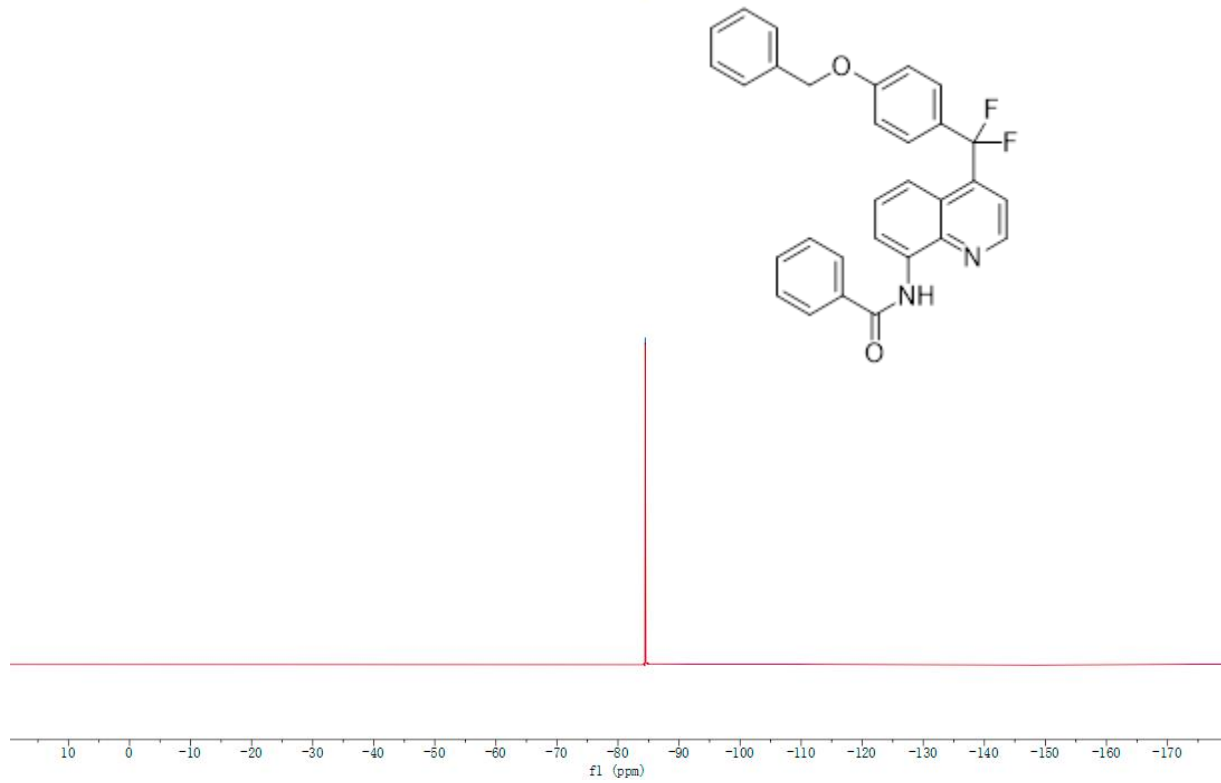

4J-C  
CNV VNMR5000

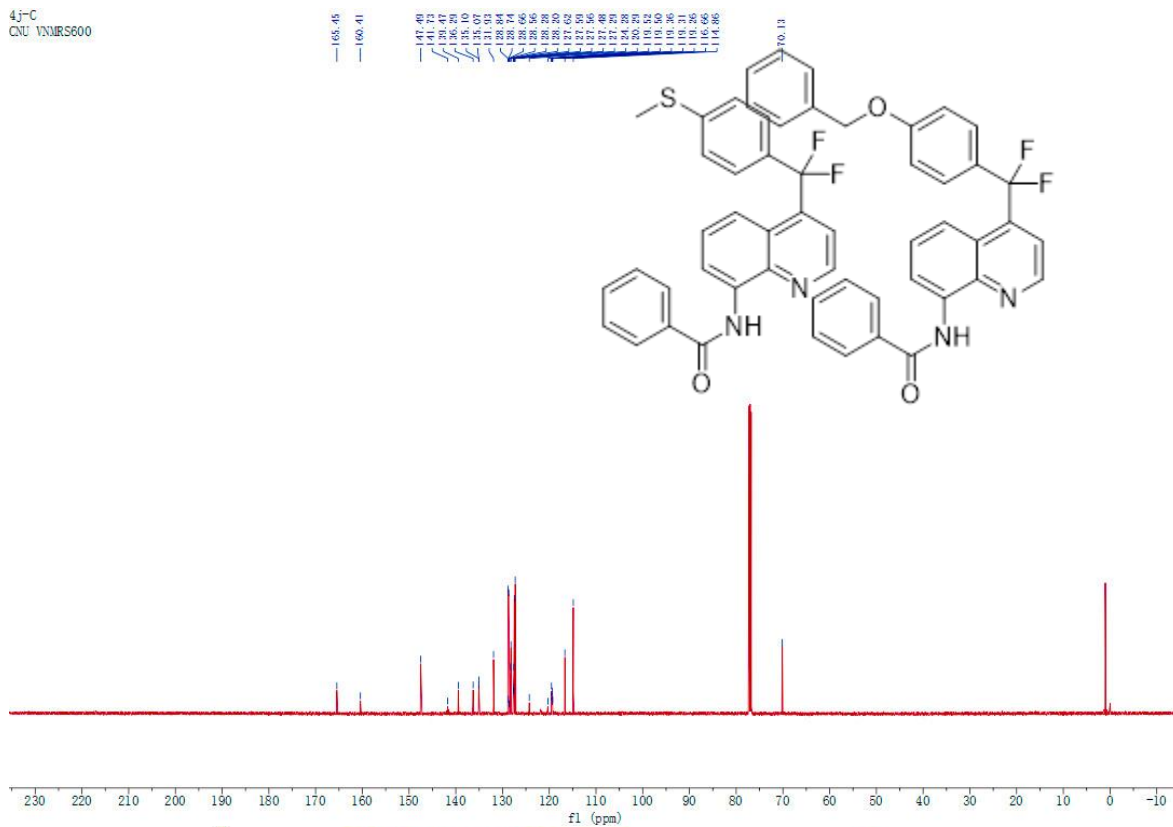

41  
STANDARD PROTON PARAMETERS

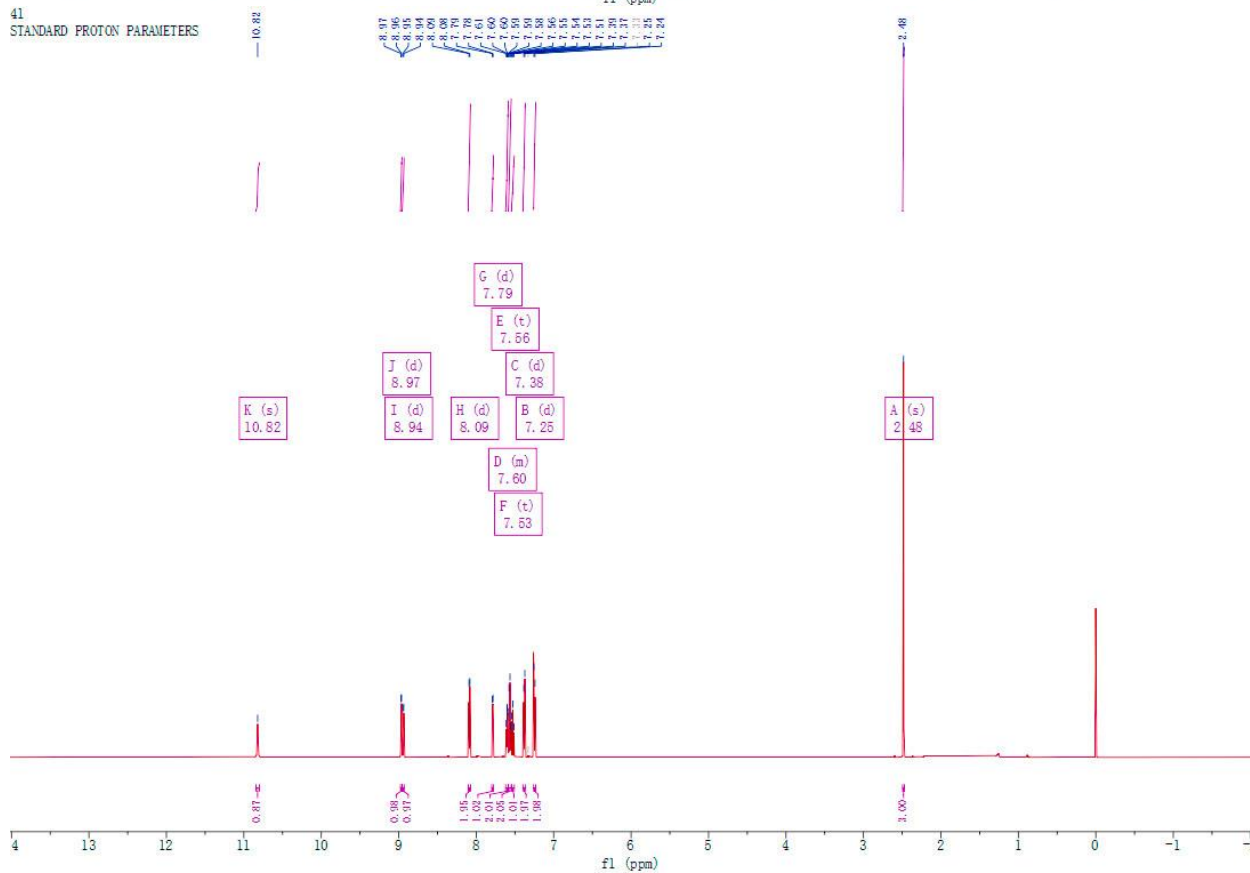



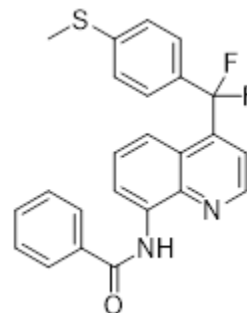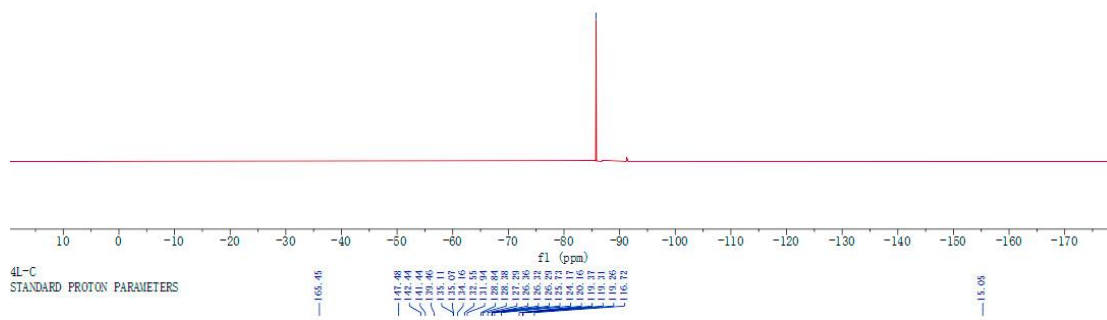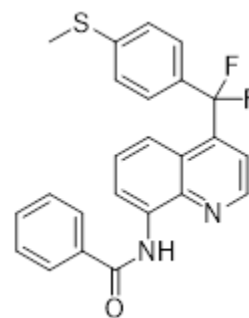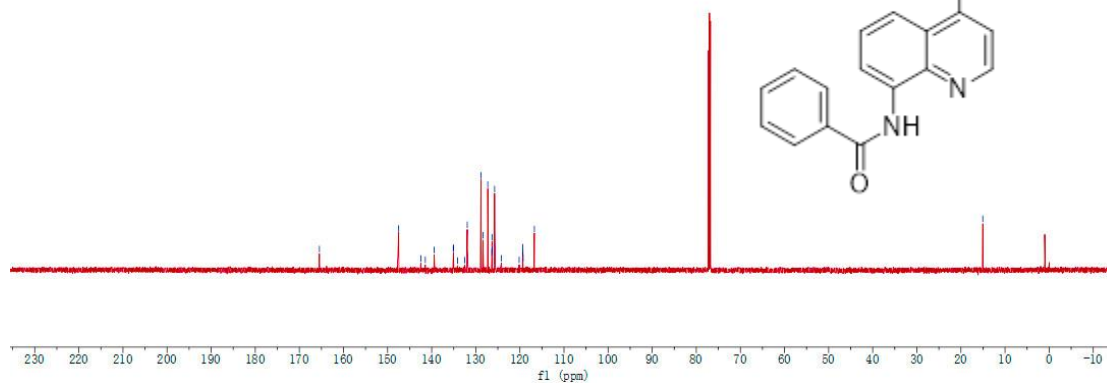

4g-H  
CNV NMR5600

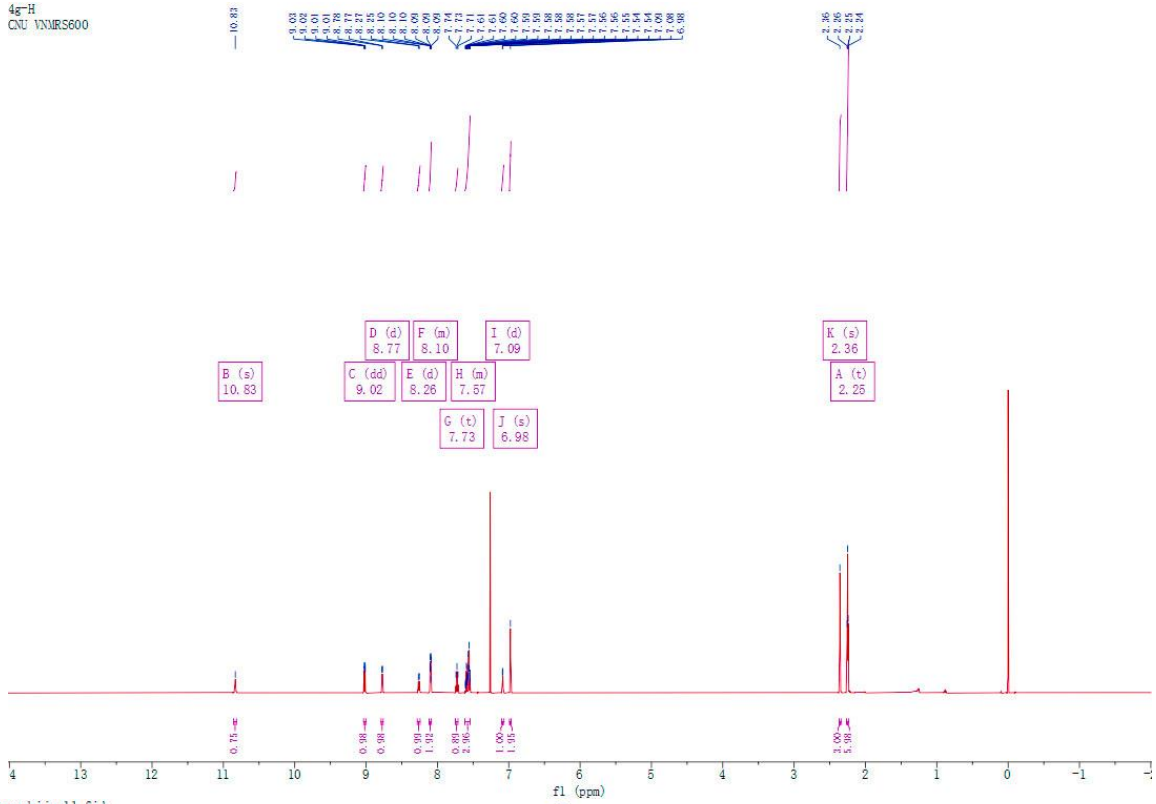

shiyanshiju.11.fid  
4g in CDCl<sub>3</sub>, 19F

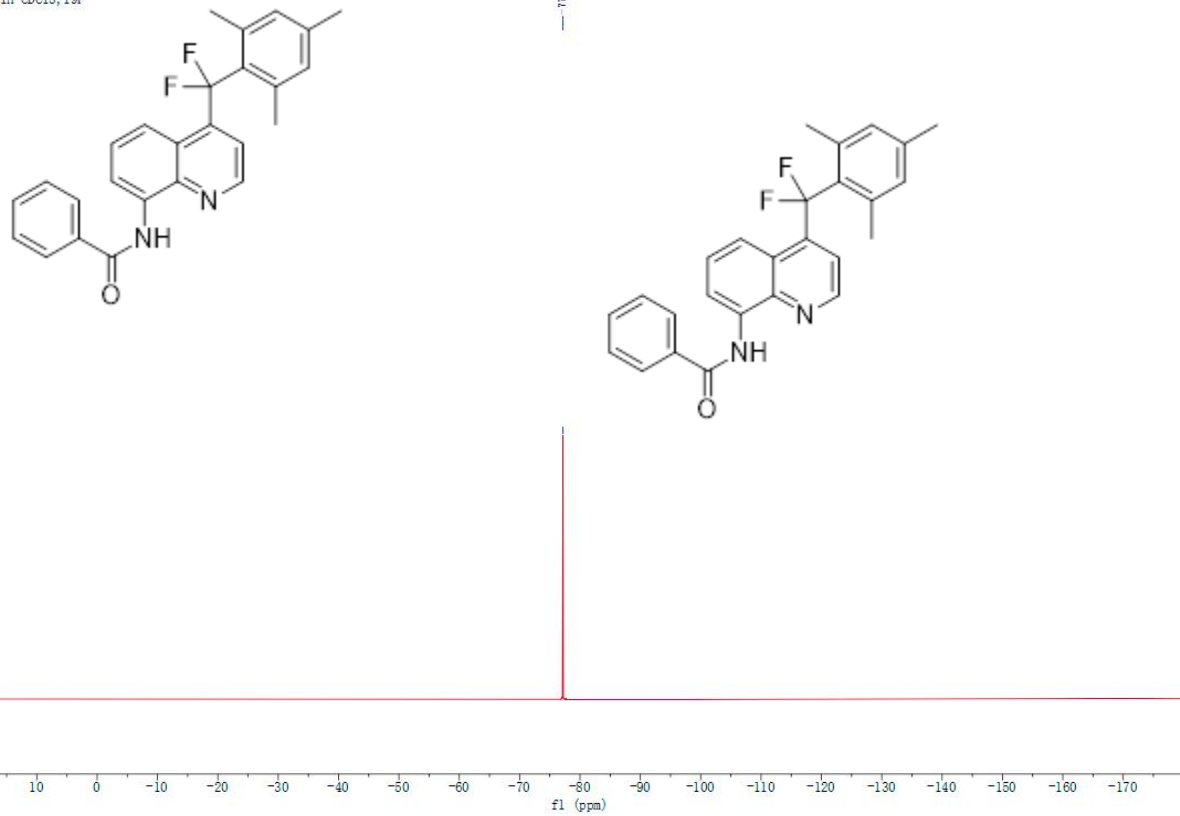

4g-C  
CNV VNMR5600

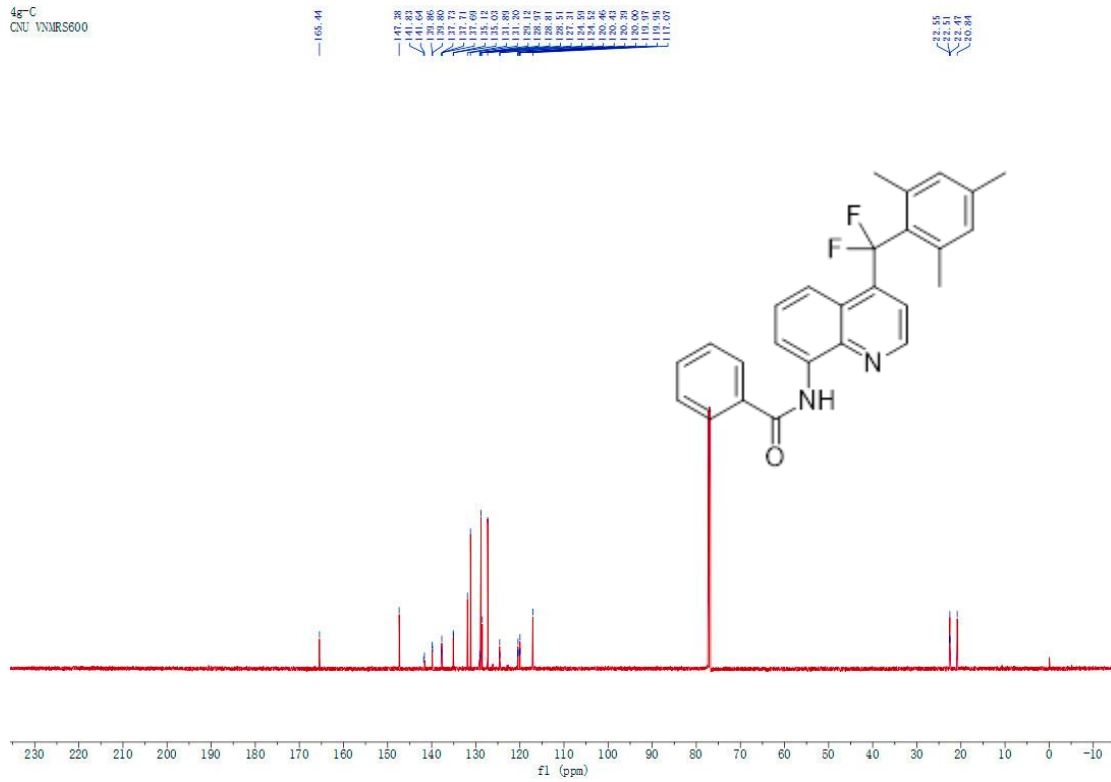

4k-H  
CNV VNMR5600

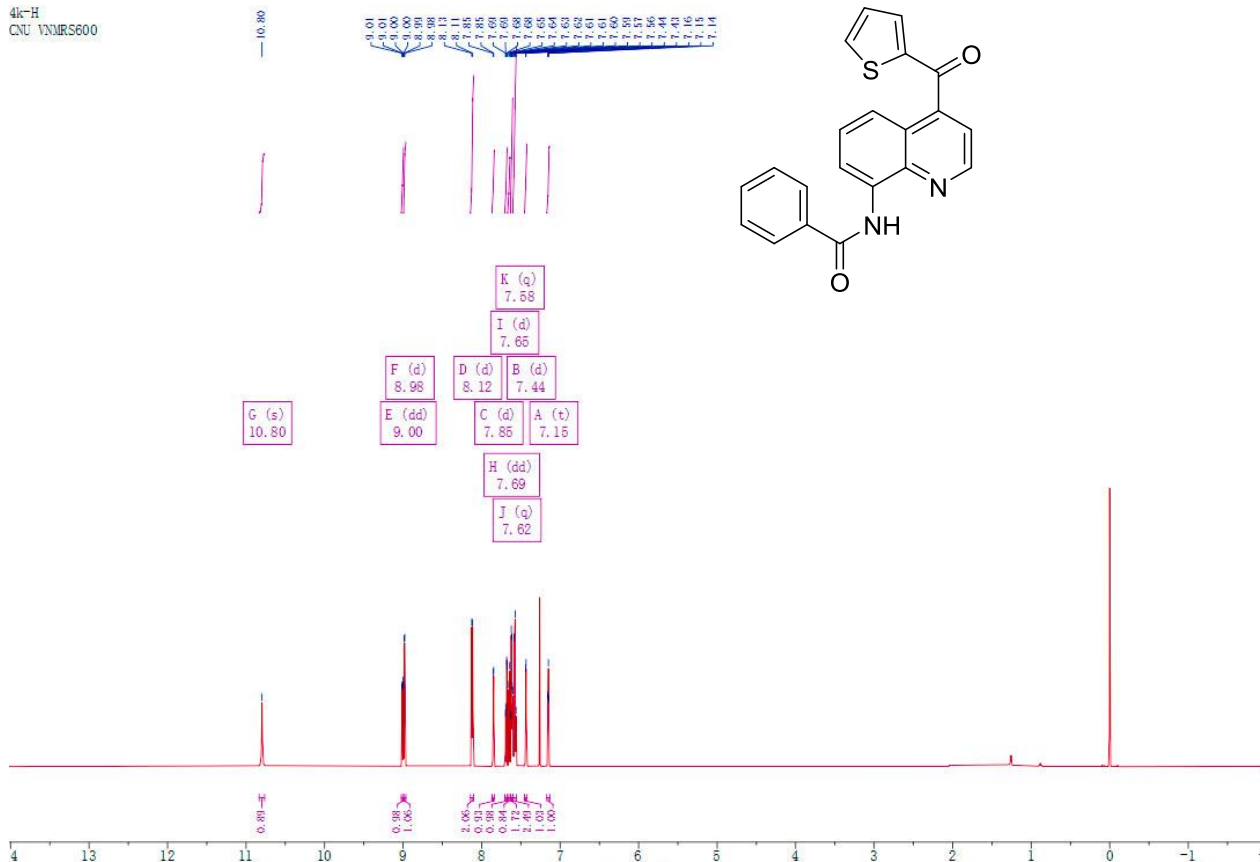

4k-C  
CNU VMRS600

187.45  
177.29  
165.90  
147.34  
144.48  
143.77  
139.19  
138.74  
136.41  
135.06  
134.93  
131.96  
131.82  
128.73  
128.57  
127.31  
127.21  
119.86  
117.17

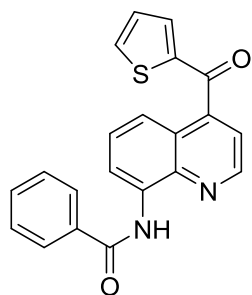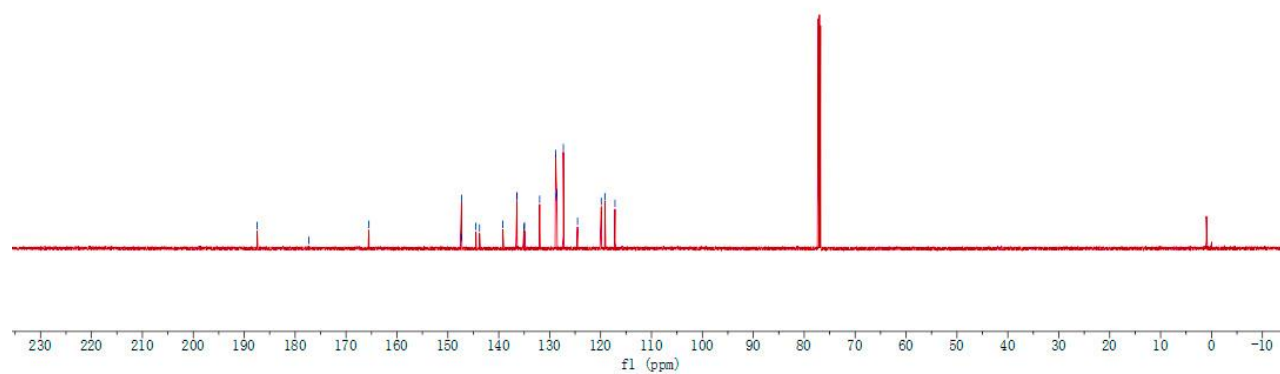



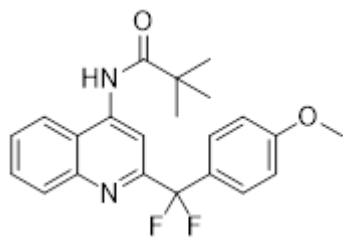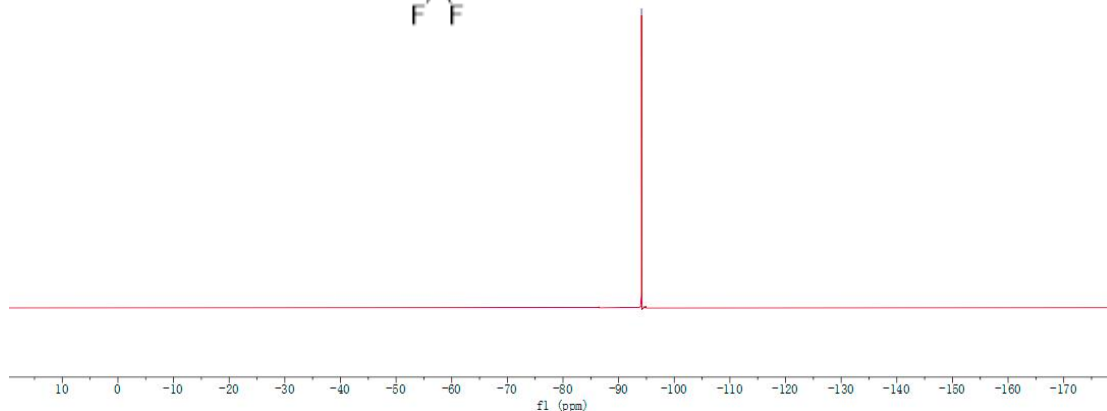

5a  
STANDARD PROTON PARAMETERS

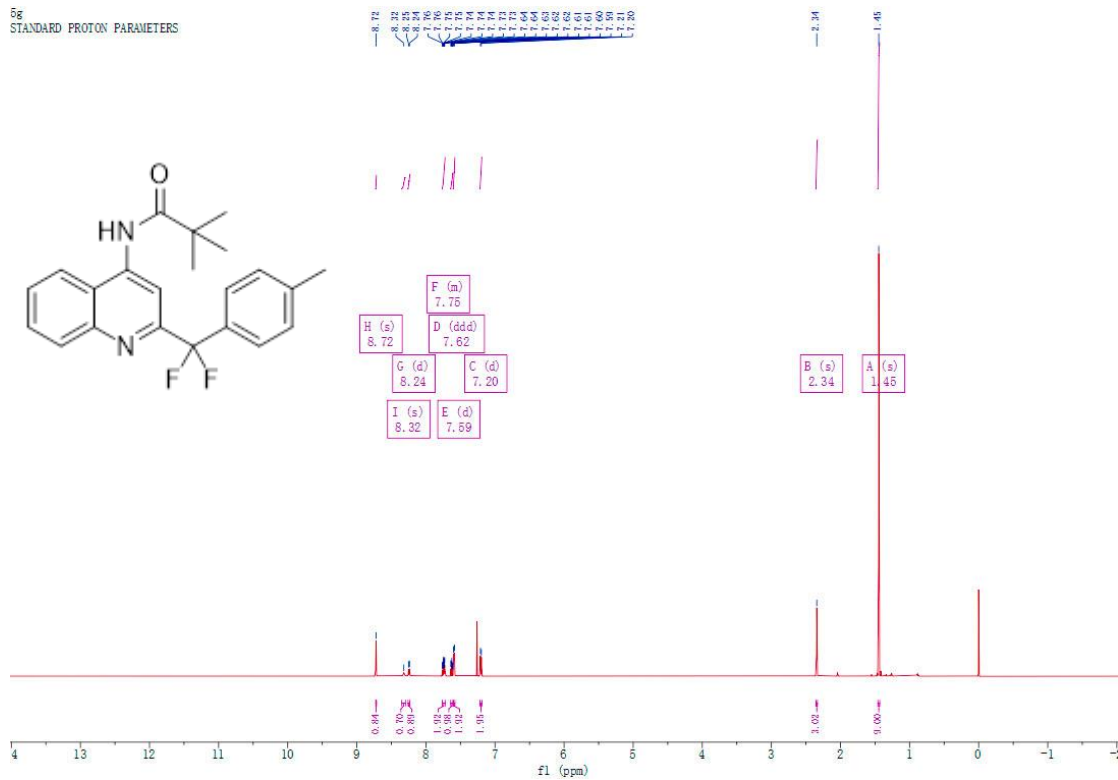

$^{63}\text{C}$   
STANDARD PROTON PARAMETERS

116.96

147.64

140.00  
130.00  
129.04  
127.04  
125.85  
123.81  
119.58  
118.09  
117.06  
107.18  
107.15

40.03

27.61

21.27

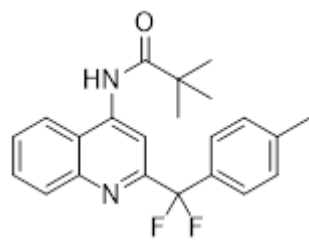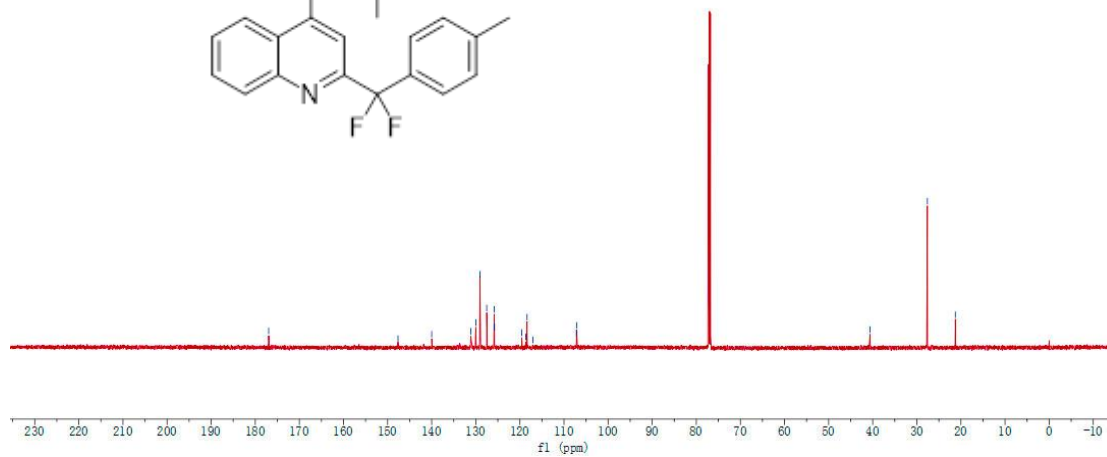

20210511.13.fid  
6j in CDCl<sub>3</sub>,19F

95.90

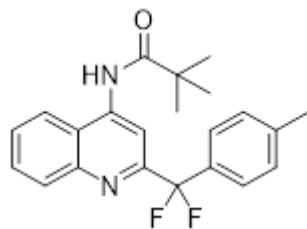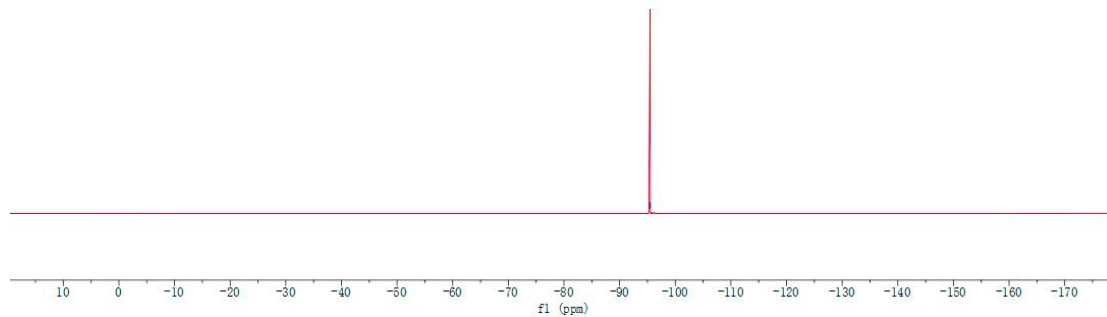







5R-C  
STANDARD PROTON PARAMETERS

116.99

147.32  
142.82  
140.57  
131.38  
129.95  
128.76  
127.58  
127.56  
127.51  
127.13  
126.67  
126.38  
125.24  
119.63  
118.23  
117.12  
107.09

40.64

27.63

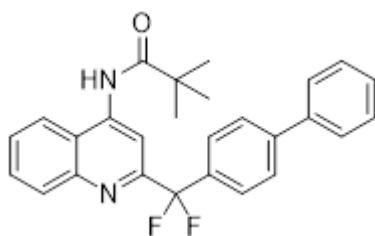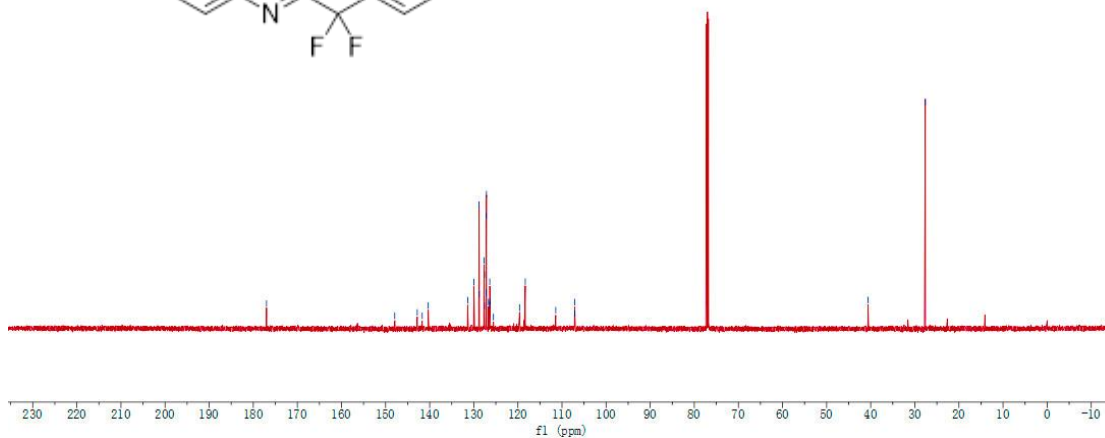

20210611.3.fid  
5r in CDCl3,19F

95.32

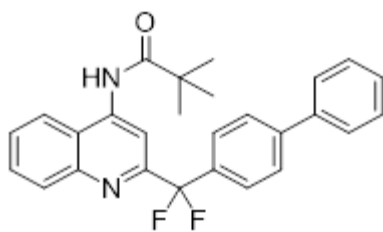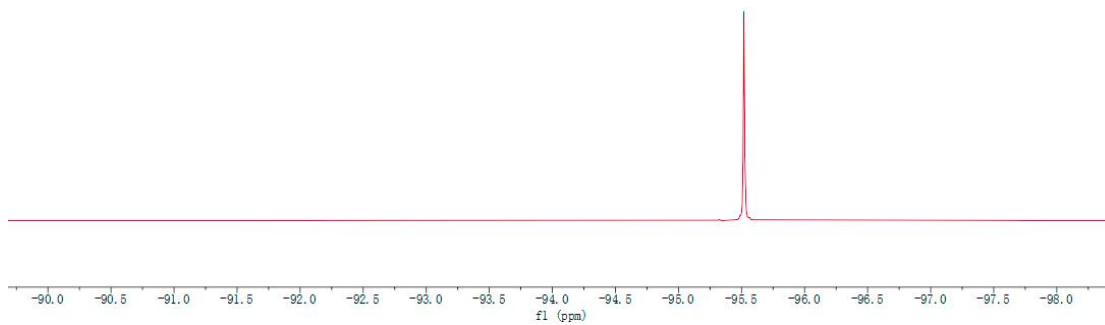

5e  
STANDARD PROTON PARAMETERS

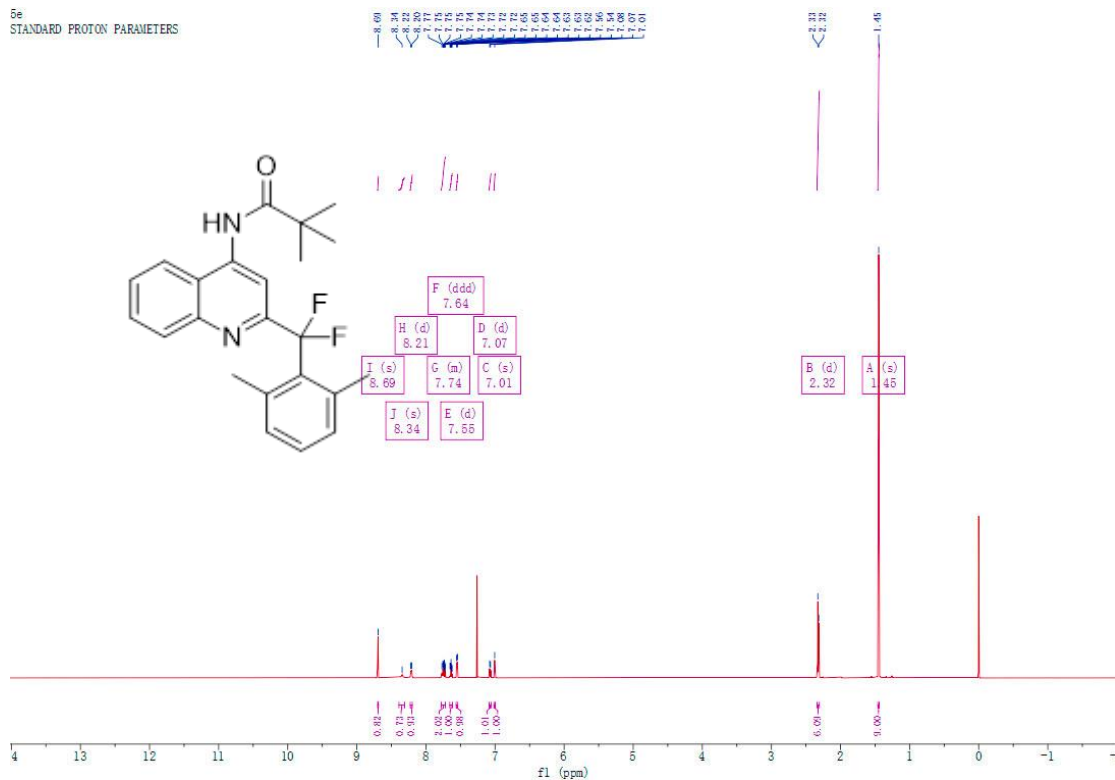

5e-C  
STANDARD PROTON PARAMETERS

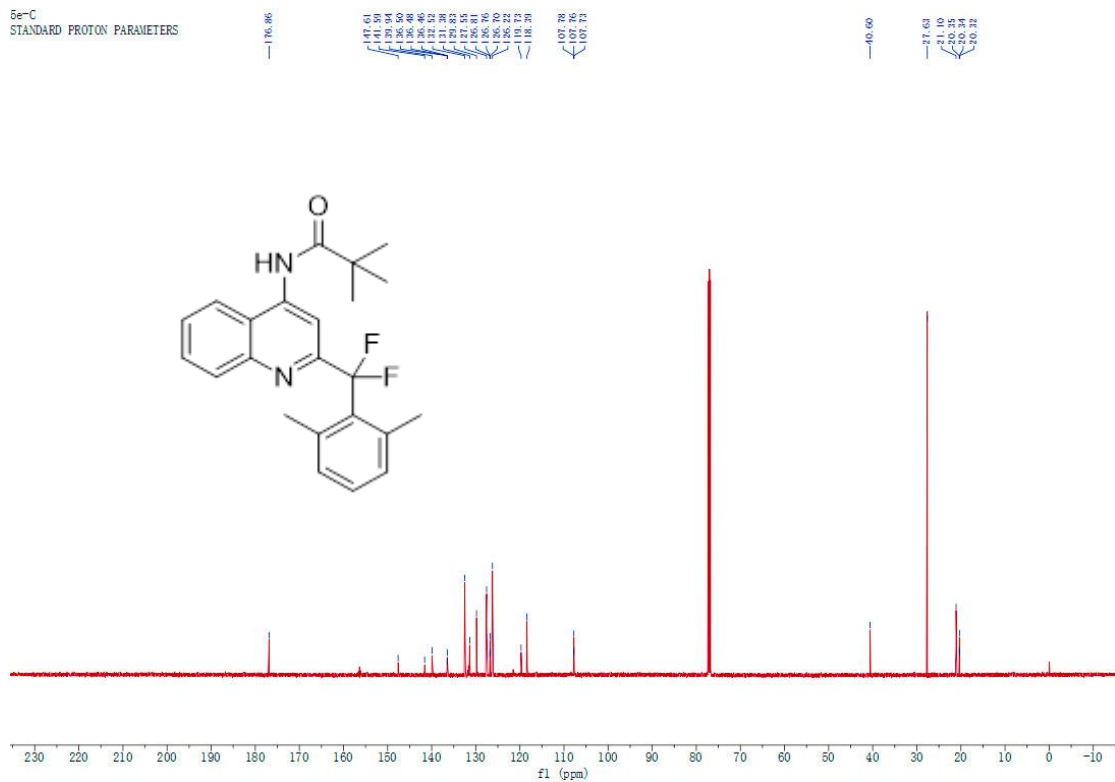

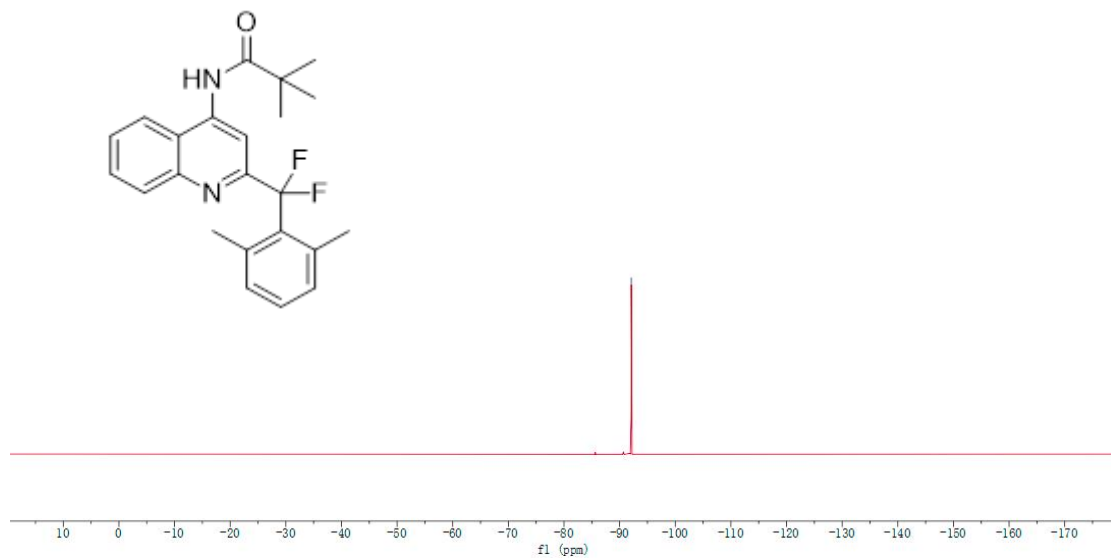

61  
STANDARD PROTON PARAMETERS

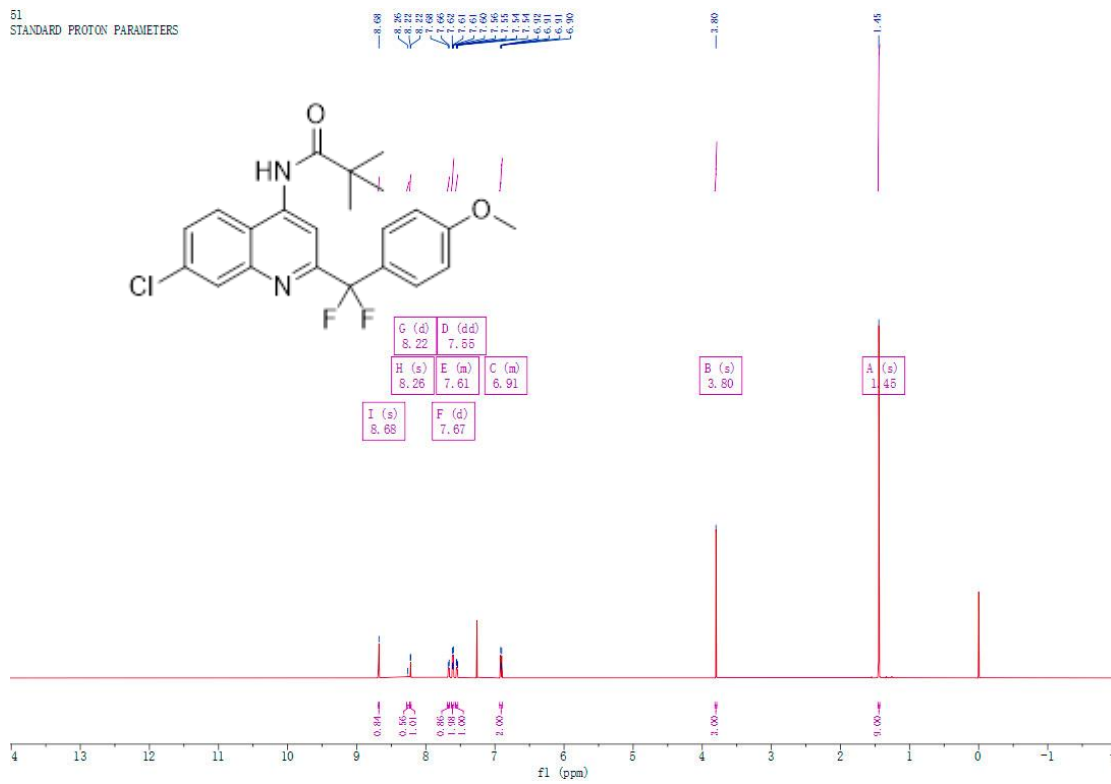

SL-C  
STANDARD 1H OBSERVE - profile

116.97  
160.81  
157.80  
148.29  
141.05  
136.07  
130.04  
128.53  
127.44  
127.41  
125.11  
120.03  
118.55  
118.14  
117.14  
107.54  
107.01  
55.29  
40.61  
27.99

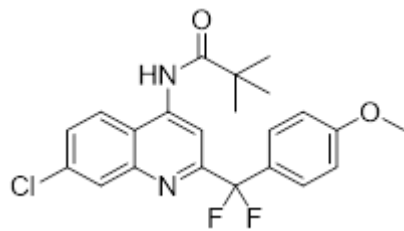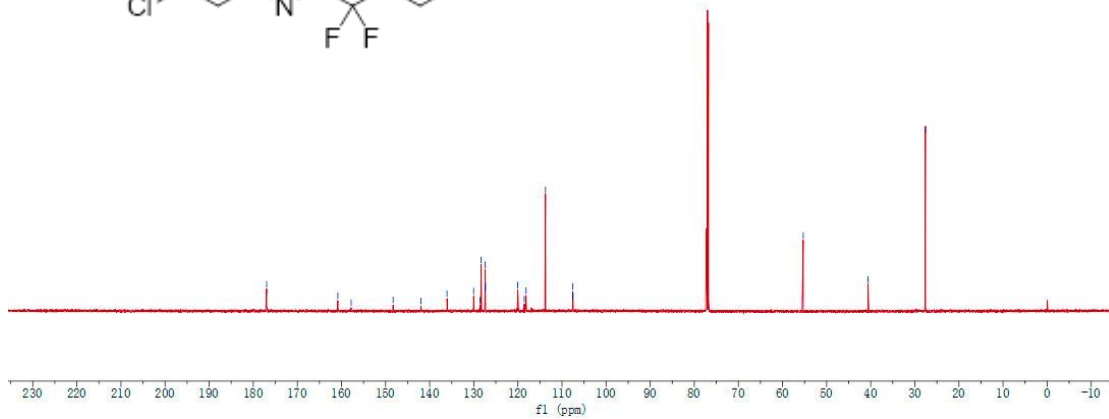

20210611.15.fid  
51 in CDCl3,19F

94.41

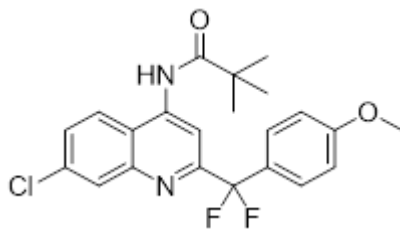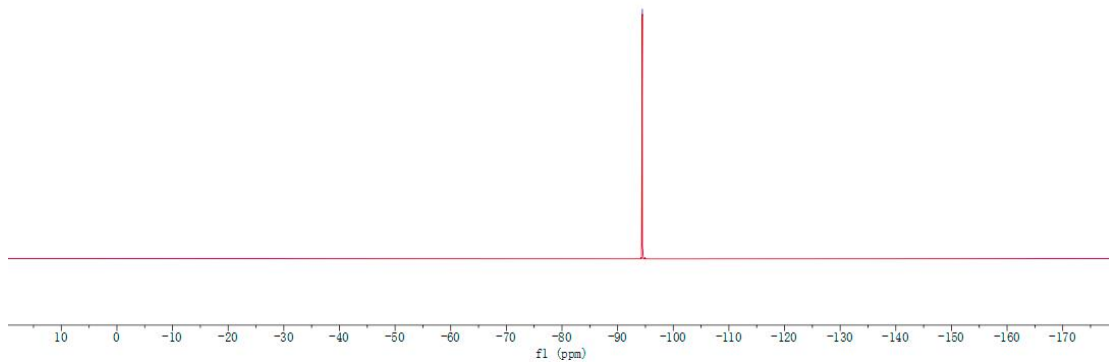

Supplement: d1qo01912k1.pdf [file d1qo01912k1.pdf]
